# Supplementary material for: Synthesis and immunopharmacological evaluation of novel TLR7 agonistic triazole tethered imidazoquinolines
Source: Royal Society of Chemistry journal article supplement (doi:10.1039/d2ra06395f), 2023-01-01
Supplement: d2ra06395f1.pdf [file d2ra06395f1.pdf]

**SYNTHESIS AND IMMUNOPHARMACOLOGICAL EVALUATION OF NOVEL TLR-  
7 AGONISTIC TRIAZOLE TETHERED IMIDAZOQUINOLINES**

**Ayyappa Avoni<sup>a,b,¶</sup>, Sravanthi Vemireddy<sup>a,¶</sup>, Shainy Sambyal<sup>a</sup>, Syed Shafi<sup>c</sup>, Imran  
Khan<sup>c</sup>, Halmuthur M. Sampath Kumar,<sup>\*,a,b</sup>**

***Affiliations***

*<sup>a</sup>Vaccine Immunology Laboratory, OSPC Division, CSIR-Indian Institute of Chemical  
Technology, Hyderabad 500007, india*

*<sup>b</sup>Academy of Scientific and Innovative Research (AcSIR), Ghaziabad Uttar Pradesh 201 002,  
India*

*<sup>c</sup>Department of Chemistry, Hamdard Univeristy, Hamdard Nagar, New Delhi, Delhi 110062*

*¶ Equal Contribution*

***\* Corresponding author:***

Dr. Halmuthur M. Sampath Kumar,

Vaccine Immunology Laboratory,

OSPC Division, CSIR-Indian Institute of Chemical Technology, Hyderabad - 500007, India

Email: [sampath.iict@gov.in](mailto:sampath.iict@gov.in), Phone: +914027191824; Fax: +91-40-27160387

**SUPPORTING INFORMATION**

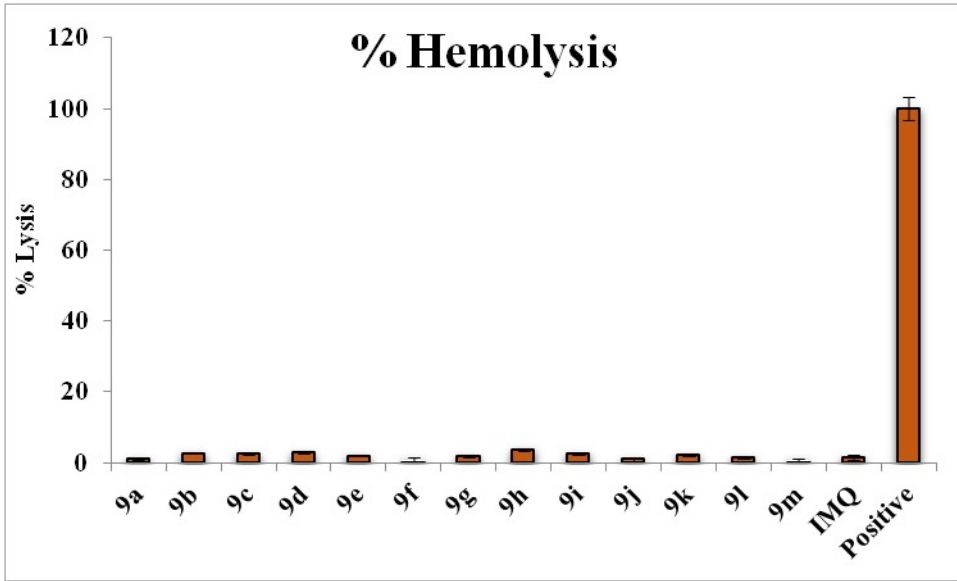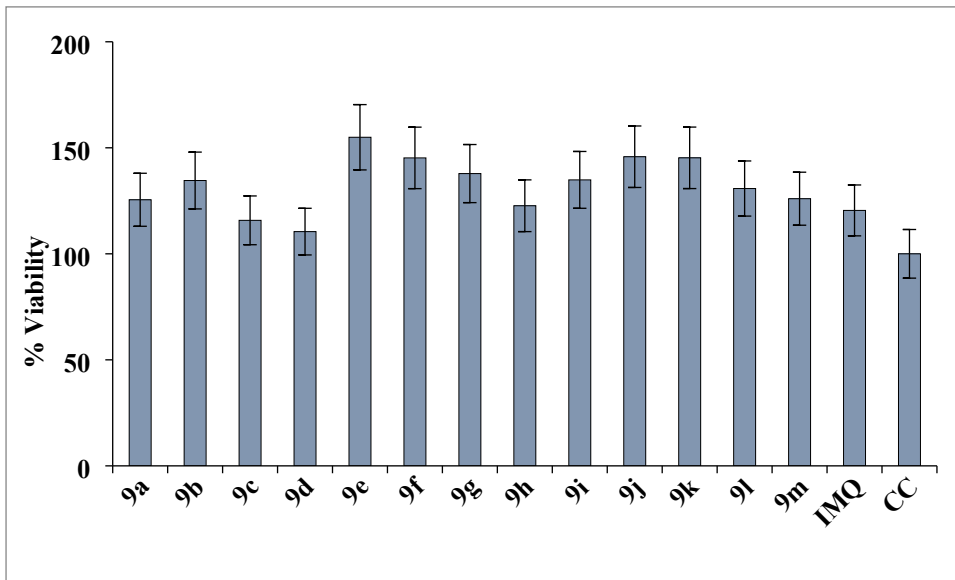

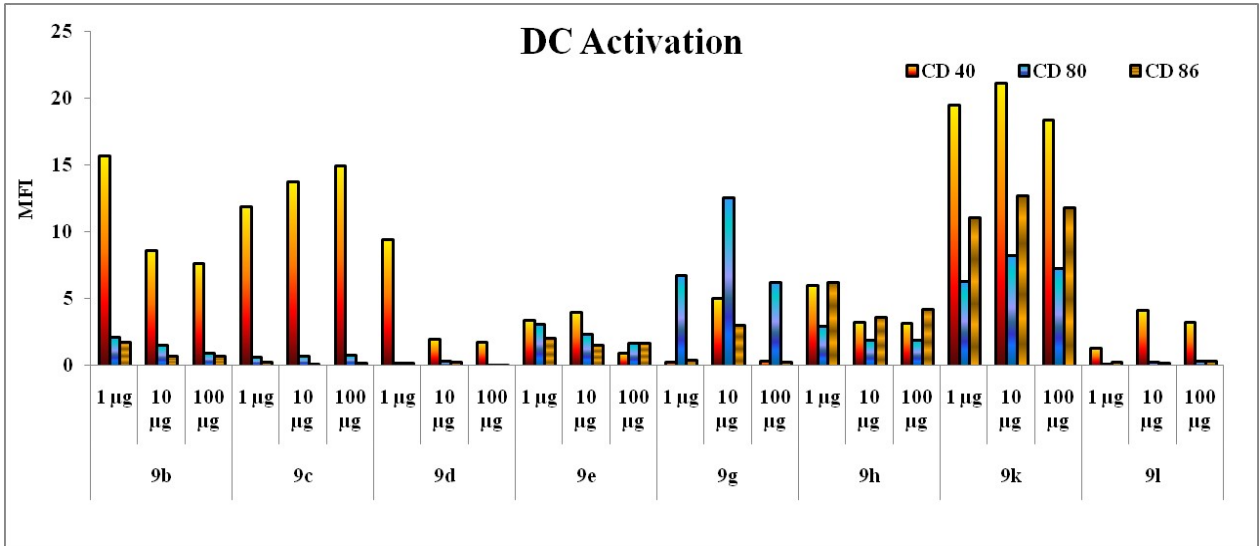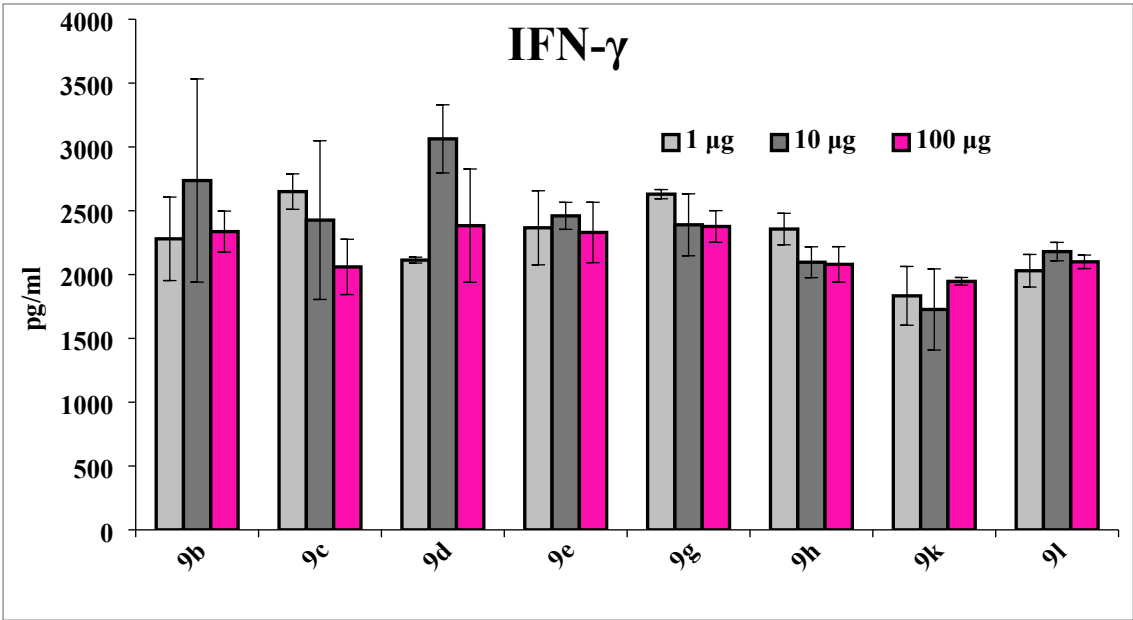

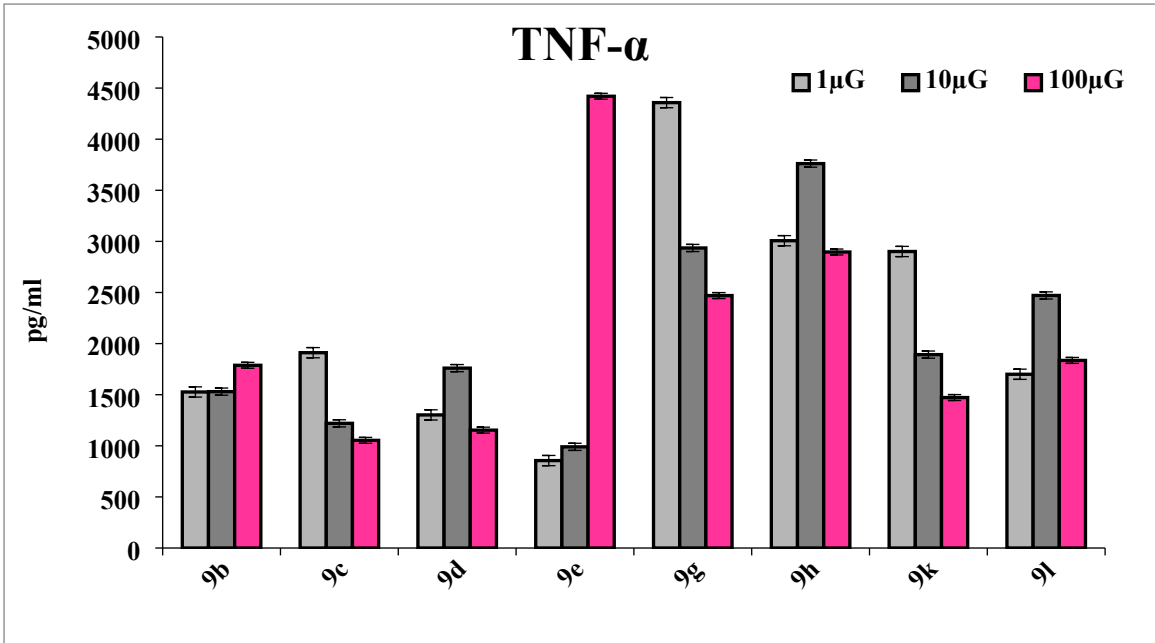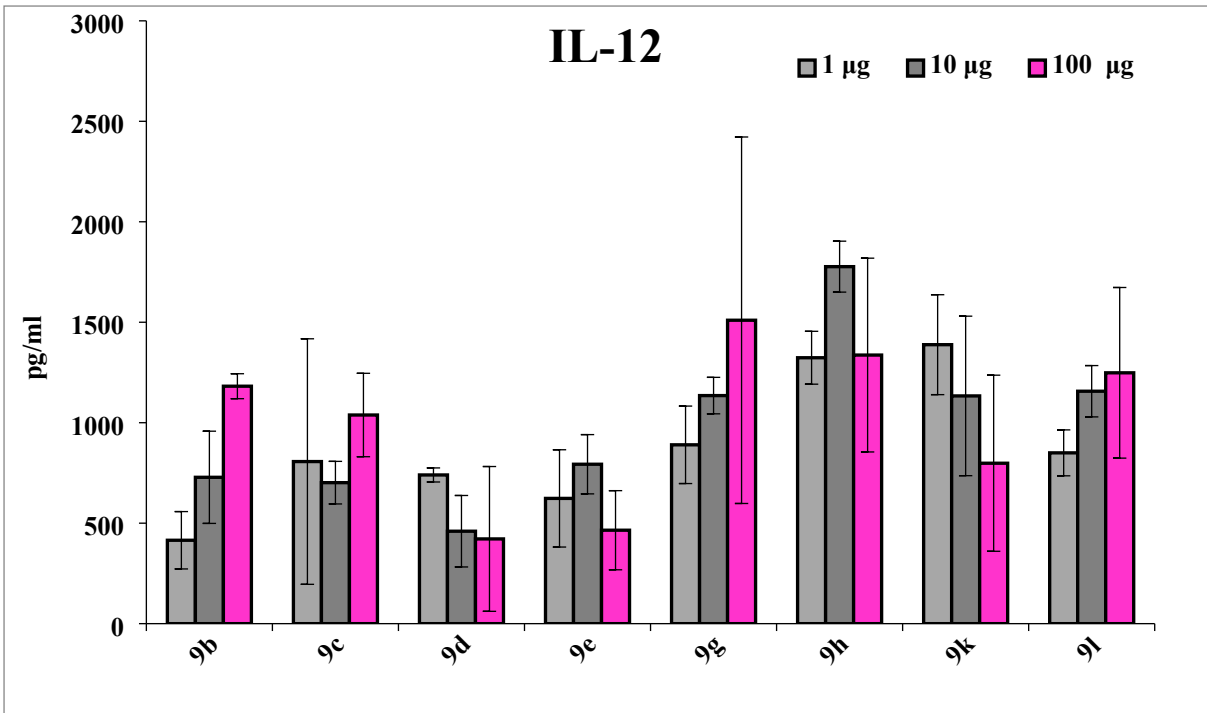

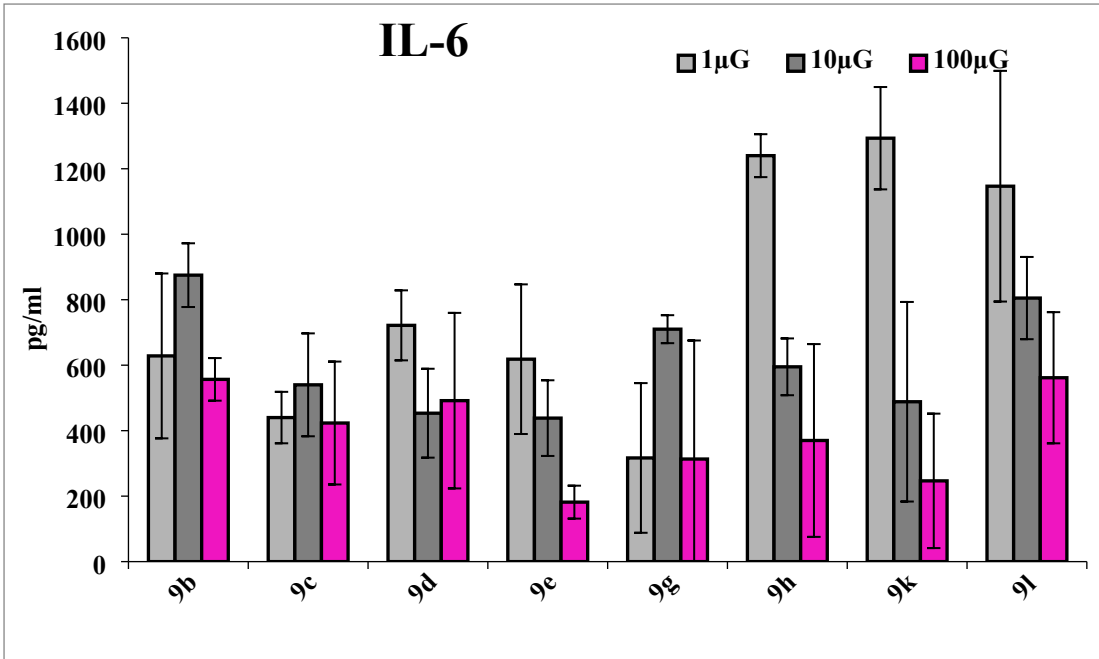

**Figure S1: - Hemolysis, cytotoxicity assay, Cell surface marker and cytokine quantification from stimulated DCs.**

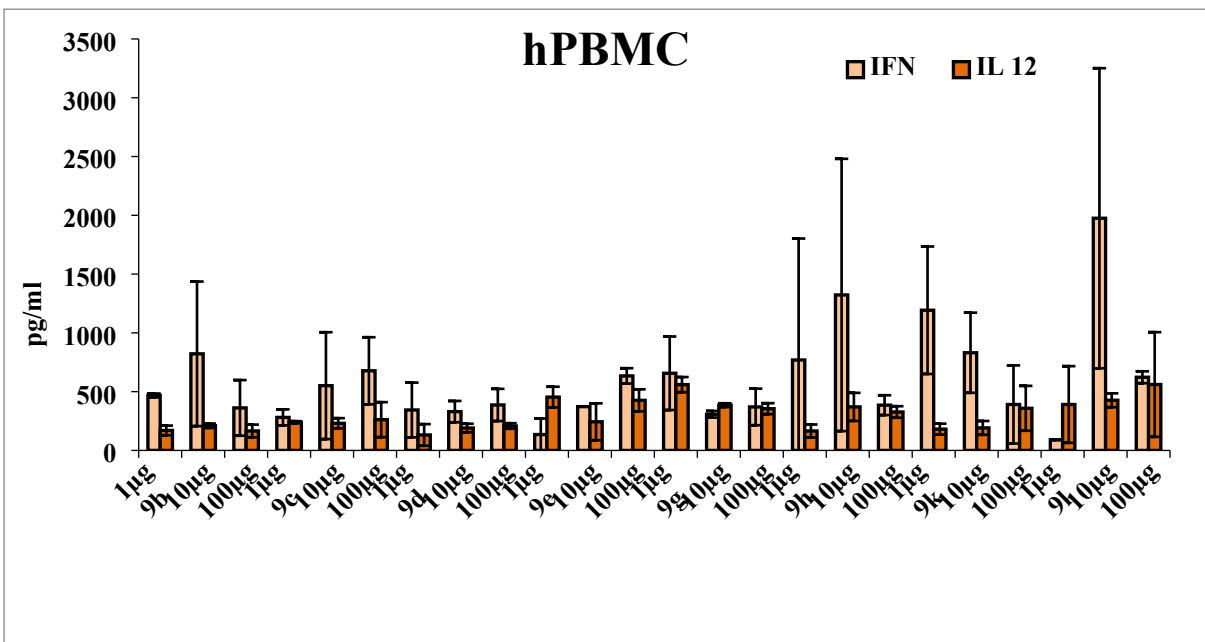

**Figure S2 - IFN and IL-12 cytokine quantification from hPBMC supernatant**

# Spectral Copies of $^1\text{H}$ , $^{13}\text{C}$ NMR, MS (ESI) and HRMS data of Compounds:

## 2. 4-chloro-3-nitroquinoline

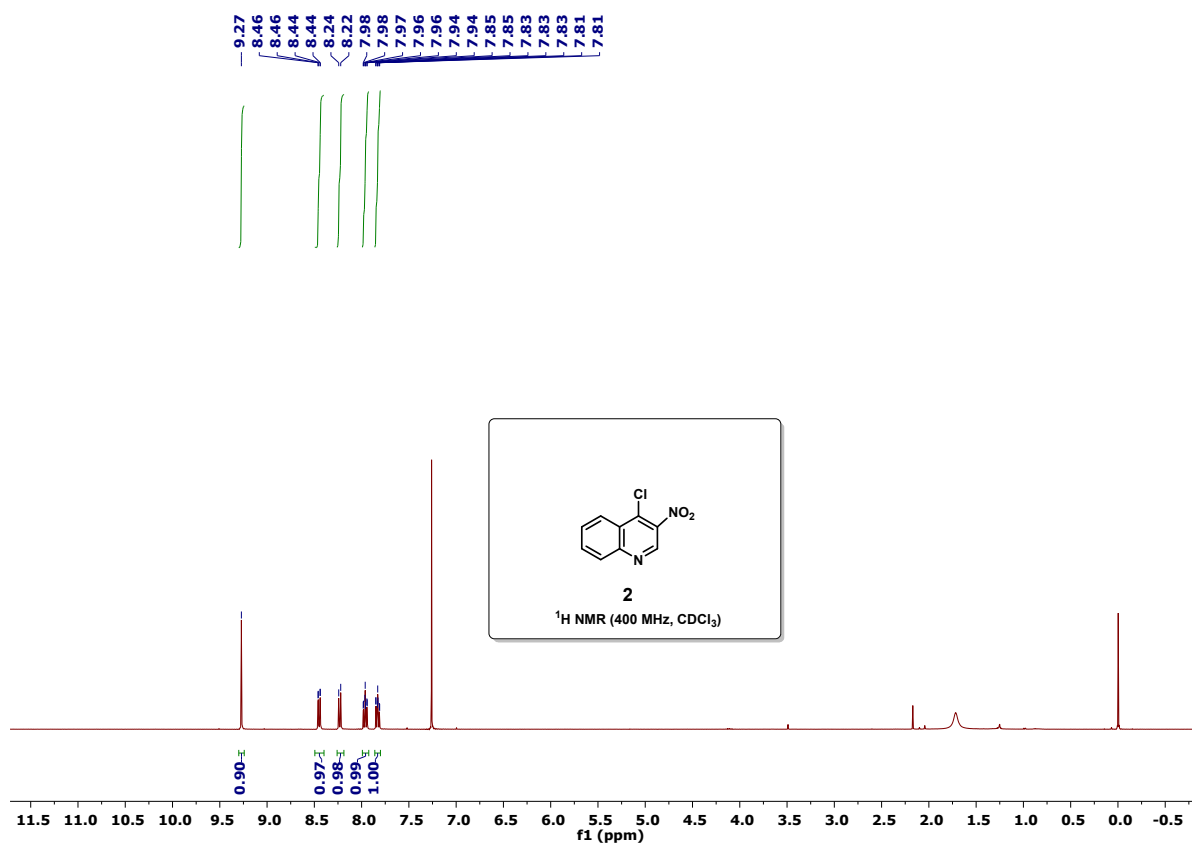

SHIMADZU  
LabSolutions

### MASS REPORT

OSPC, Dr RATHOD

Sample Name : HMS-RQ-208  
Data File : 23112020\_35.lcd  
Date Acquired : 11/23/2020 3:23:08 PM  
Batch File : 23112020.lcb

MS Spectrum  
D:\DATA\NOV-2020\23112020\_35.lcd

Averaged ESI Positive+  
Spectrum Mode: Averaged 0.420-0.812(181-349)  
[GPS]

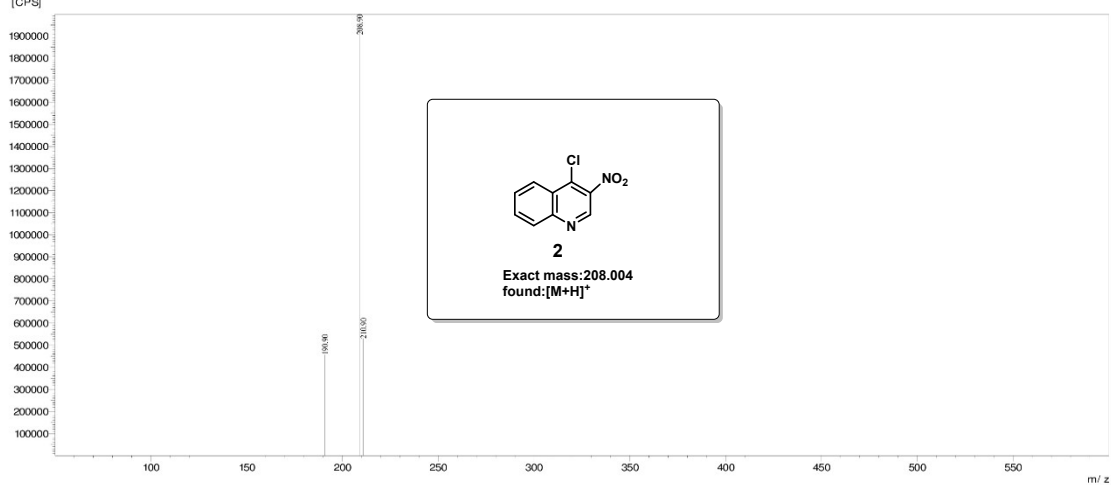

### 3. 4-isobutylamino-3-nitroquinoline

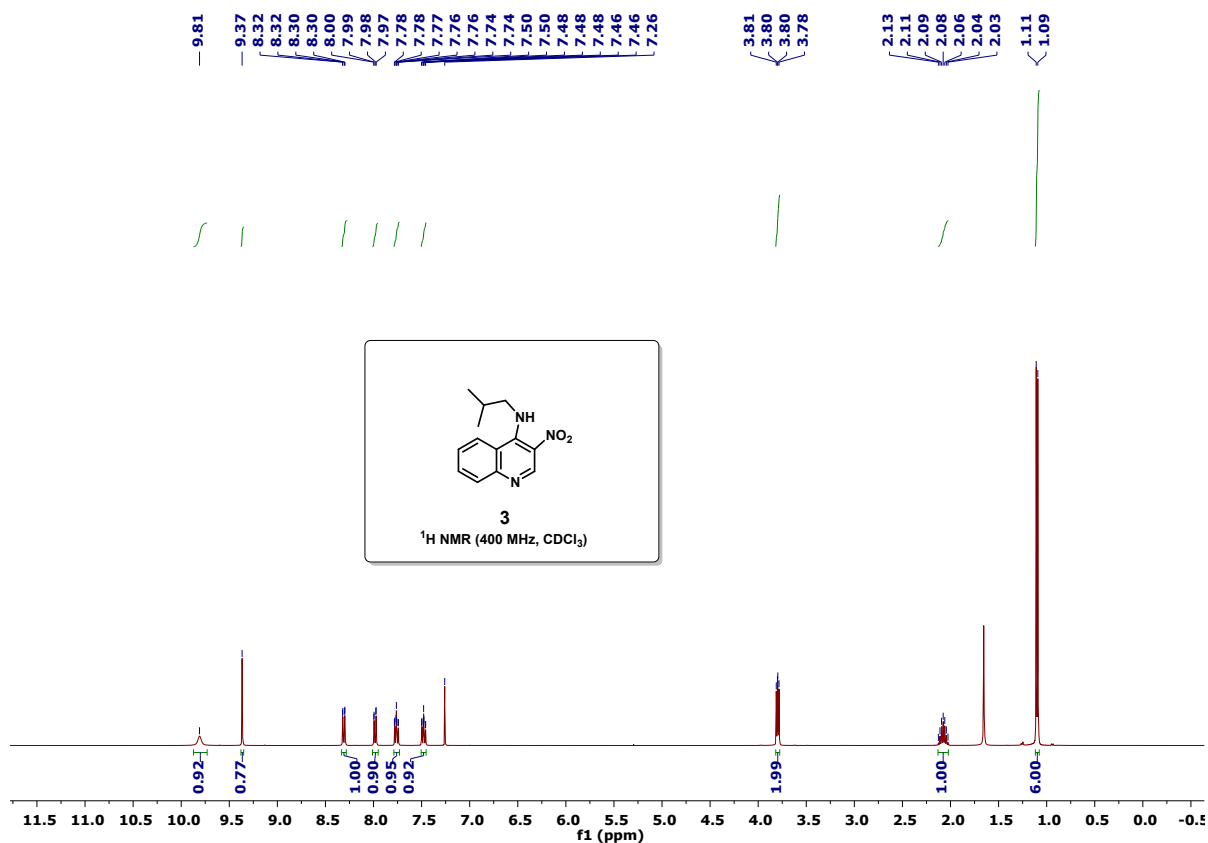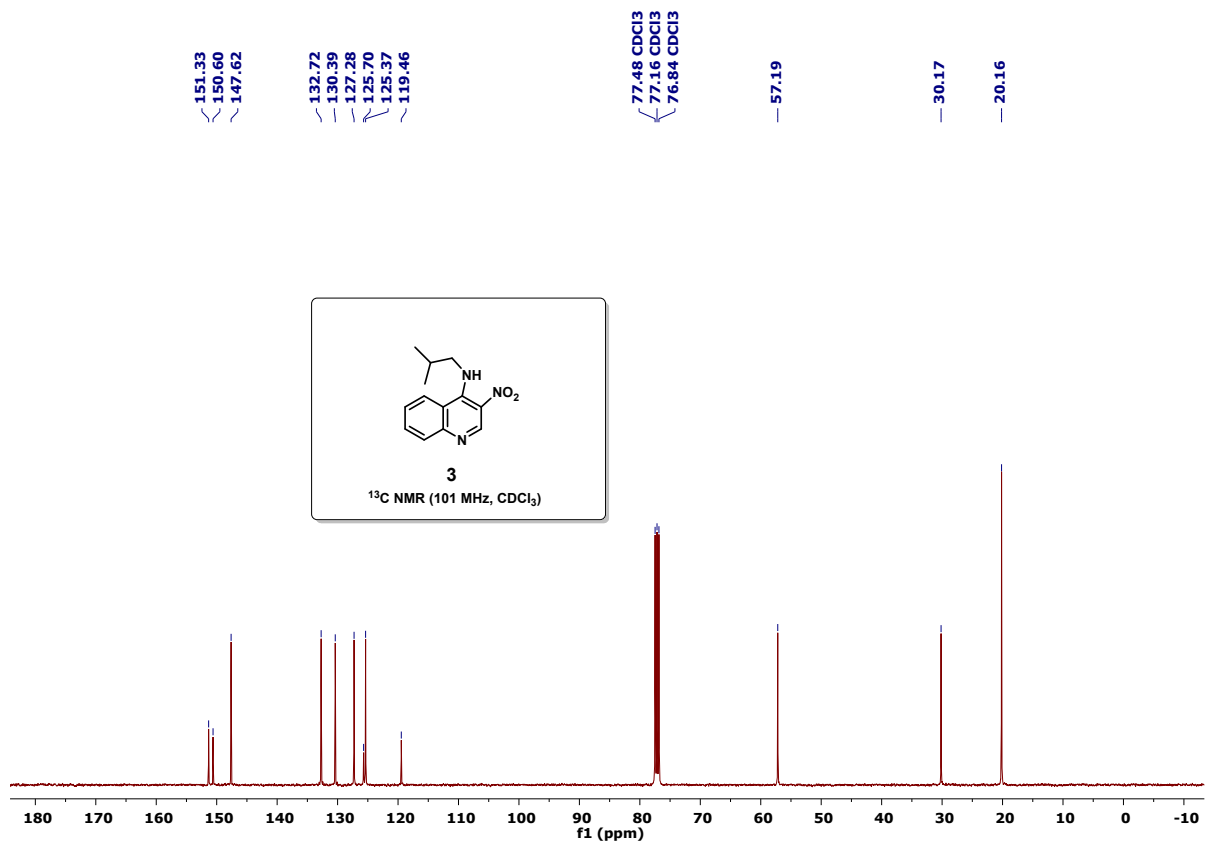

# MASS REPORT

Sample Name : HMS-AN-245  
 Data File : 09112020.71cd  
 Date Acquired : 11/9/2020 12:32:18 PM  
 Batch File : 09112020.1cb

MS Spectrum  
 D:\DATA\NOV-2020\09112020.71cd

Averaged ESI Positive+  
 Spectrum Mode: Averaged 0.411-0.803(177-345)  
 [CPS]

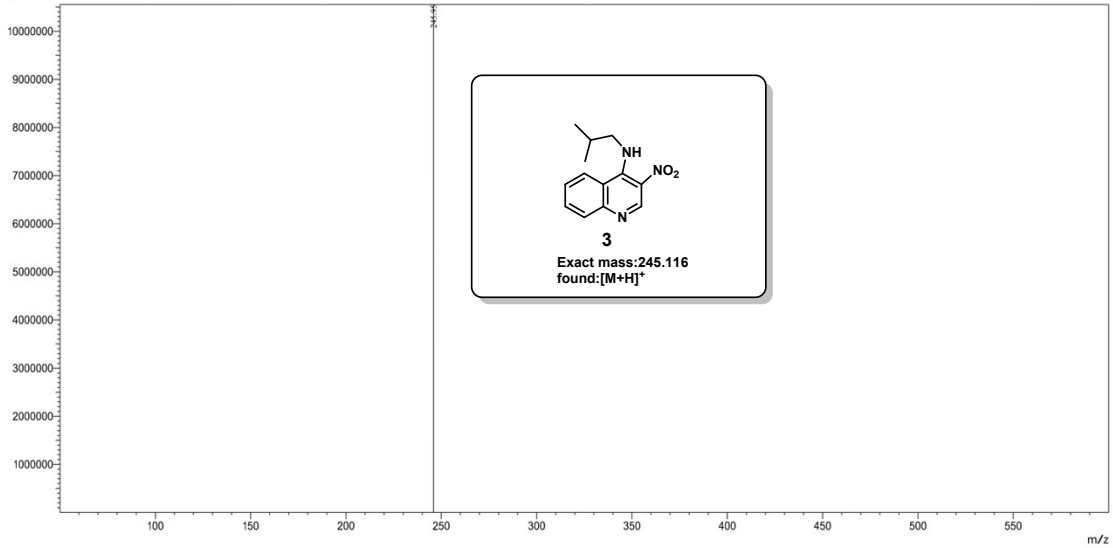

1

## 4.3-amino-4-isobutylaminoquinoline

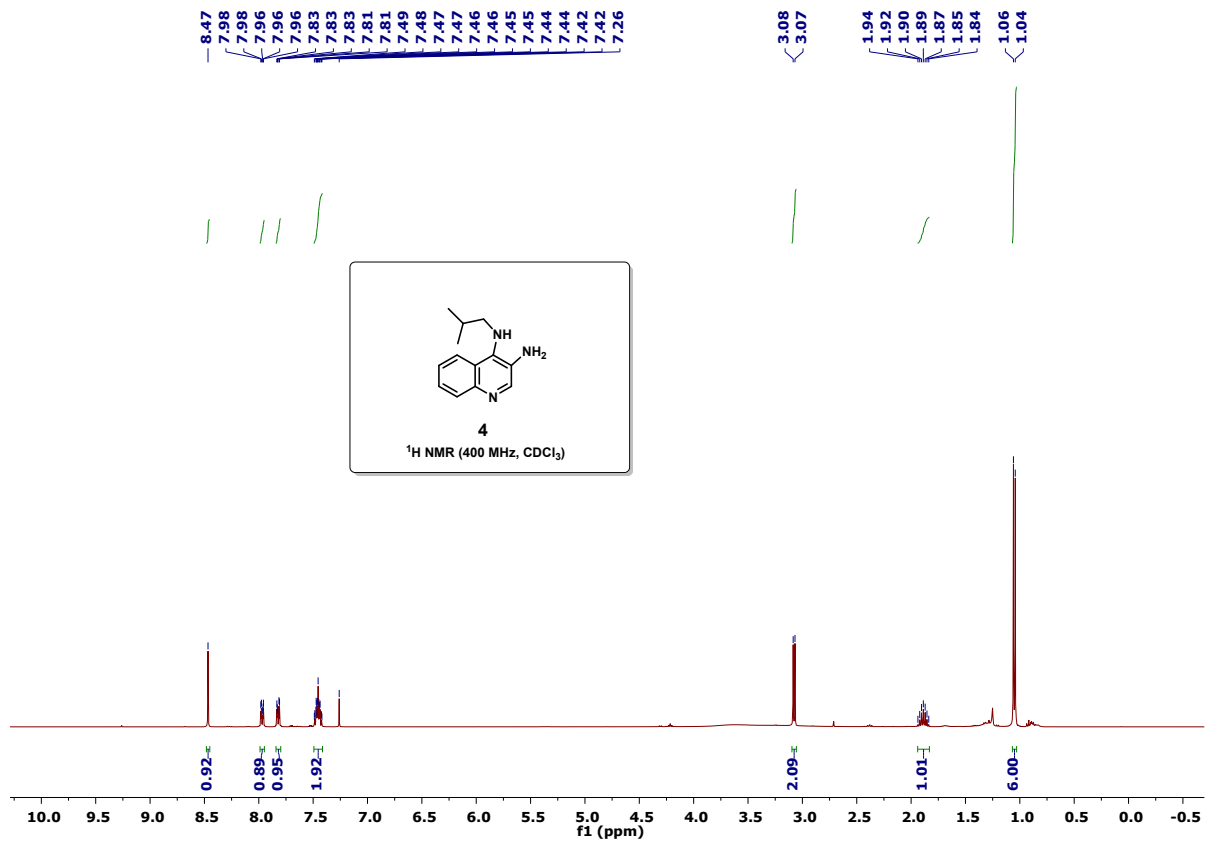



144.41  
143.53  
136.70  
130.48  
129.89  
125.97  
125.92  
123.55  
120.18

77.41 CDCl<sub>3</sub>  
77.16 CDCl<sub>3</sub>  
76.91 CDCl<sub>3</sub>

54.75

30.01

20.53

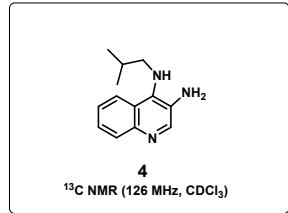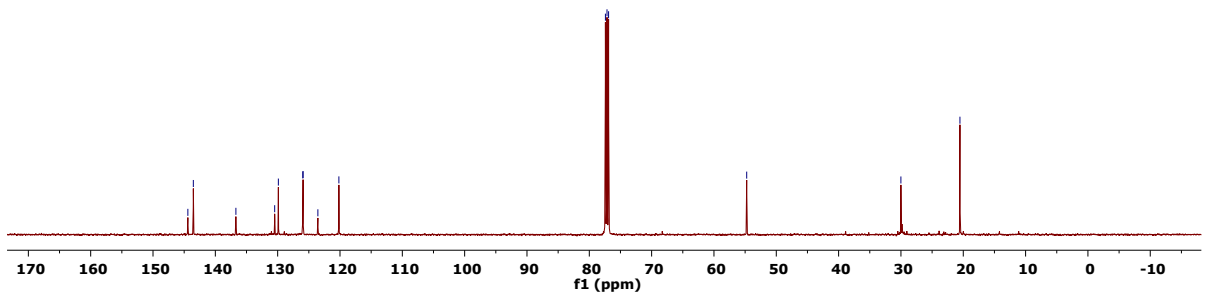

OSPC, Dr RATHOD

SHIMADZU  
LabSolutions

## MASS REPORT

Sample Name : HMS-AN-215  
Data File : 16112020.35.lcd  
Date Acquired : 11/16/2020 5:21:28 PM  
Batch File : 16112020.1cb

MS Spectrum  
D:\DATA\NOV-2020\16112020.35.lcd

Averaged ESI Positive+  
Spectrum Mode: Averaged 0.415-0.779(179-335)

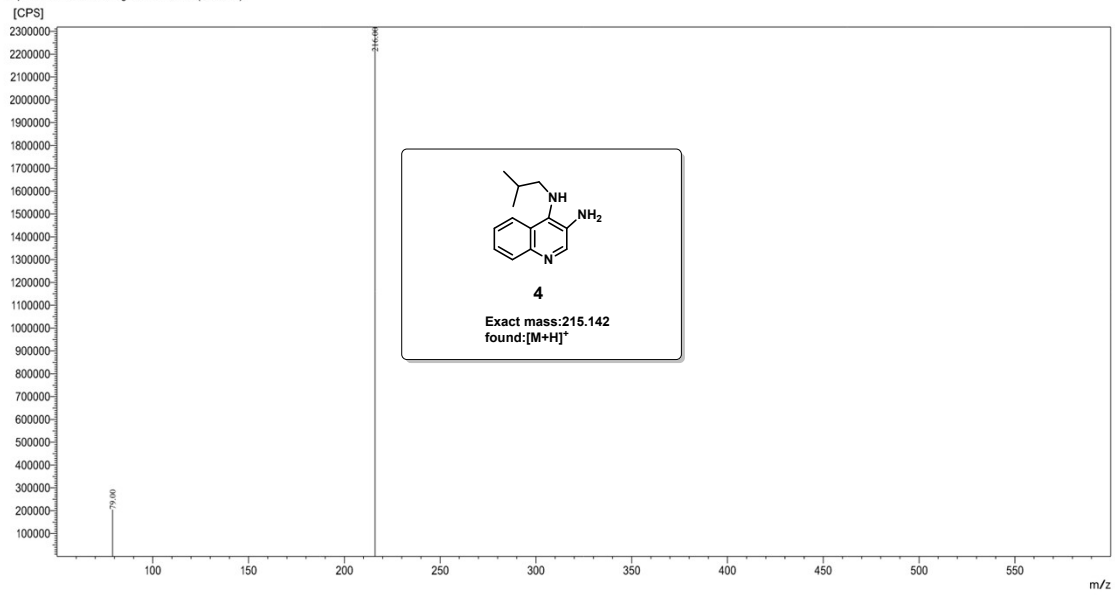

1

## 5. 2-(but-3-yn-1-yl)-1-isobutyl-1H-imidazo[4,5-c]quinoline

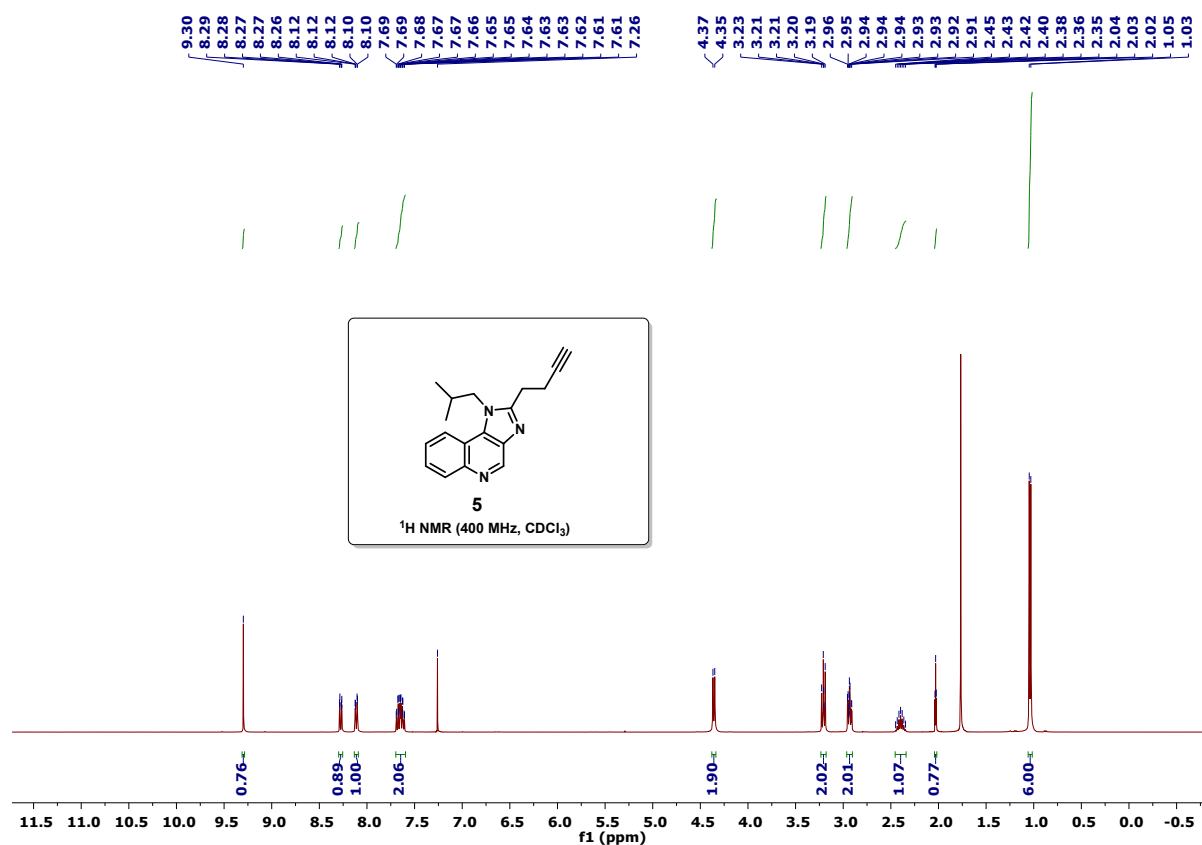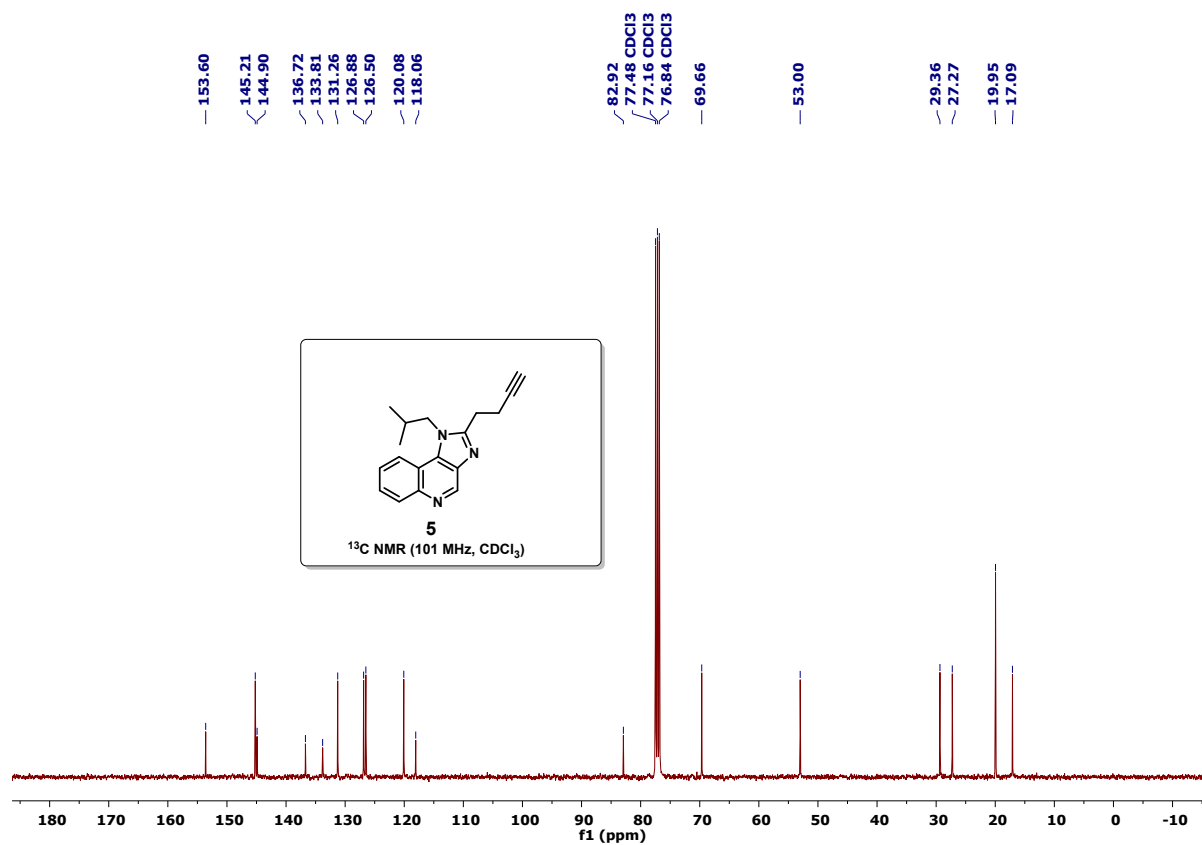

## MASS REPORT

Sample Name : HMS-AN-277  
 Data File : 04122020.51.lcd  
 Date Acquired : 12/4/2020 5:24:57 PM  
 Batch File : 04122020.lch

MS Spectrum  
 D:\DATA\NOV-2020\04122020.51.lcd

Averaged ESI Positive+  
 Spectrum Mode: Averaged 0.401-0.817(173-351)  
 [CPS]

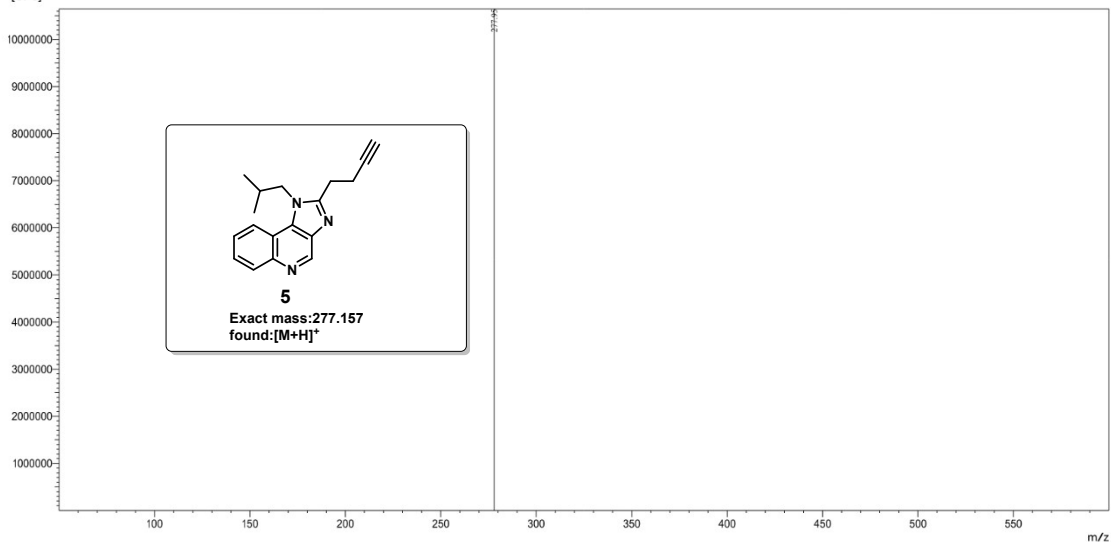

1

## 6. 2-(but-3-yn-1-yl)-1-isobutyl-1H-imidazo[4,5-c]quinoline 5-oxide

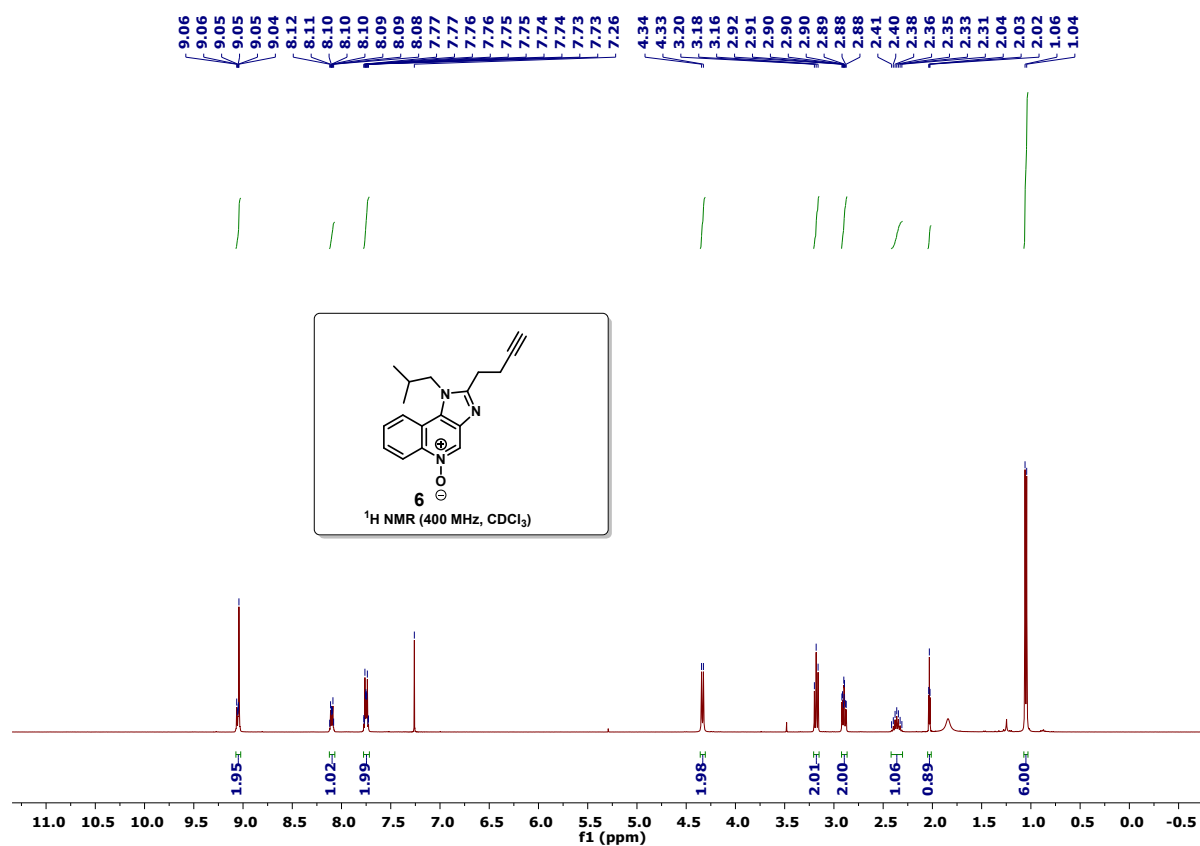

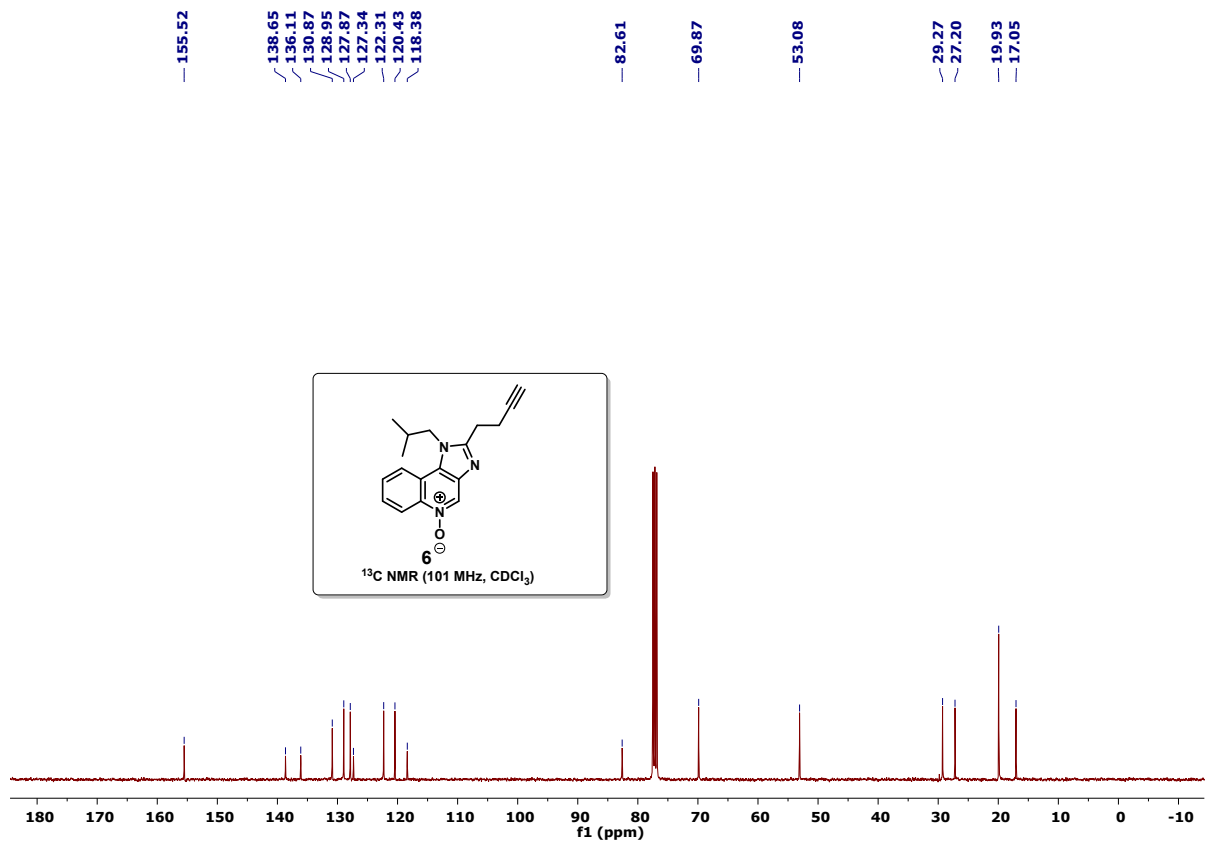

OSPC, Dr RATHOD

SHIMADZU  
LabSolutions

## MASS REPORT

Sample Name : HMS-AN-293  
 Data File : 18122020.10.lcd  
 Date Acquired : 12/18/2020 11:23:53 AM  
 Batch File : 18122020.1cb

MS Spectrum  
D:\DATA\DEC-2020\18122020.10.lcd

Averaged ESI Positive+  
 Spectrum Mode: Averaged 0.434-0.812(187-349)

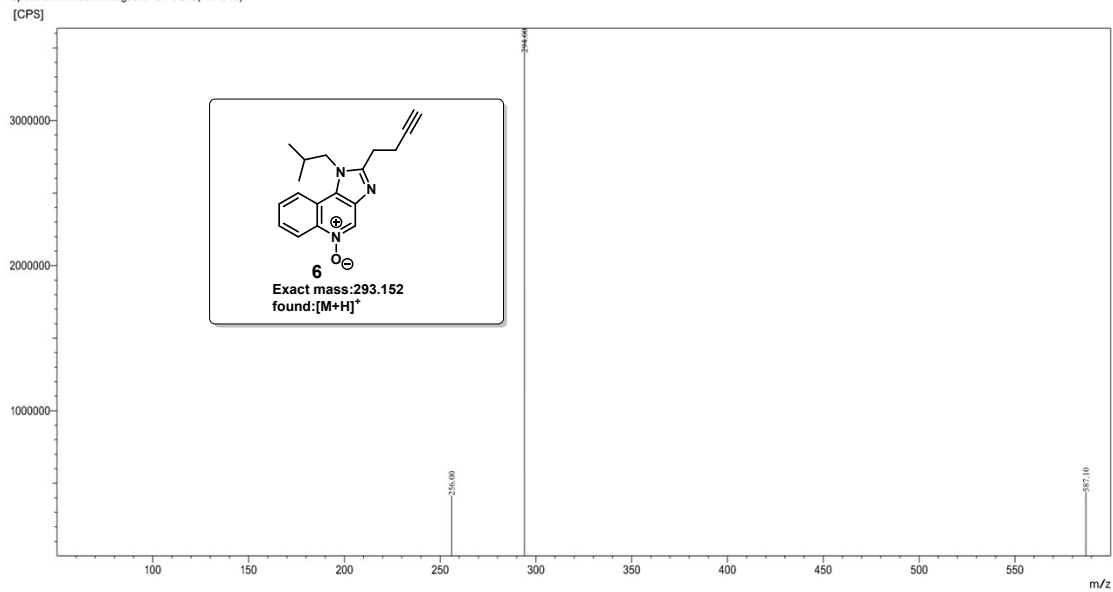

1

7. N-(2-(but-3-yn-1-yl)-1-isobutyl-1H-imidazo[4,5-c]quinolin-4-yl)benzamide

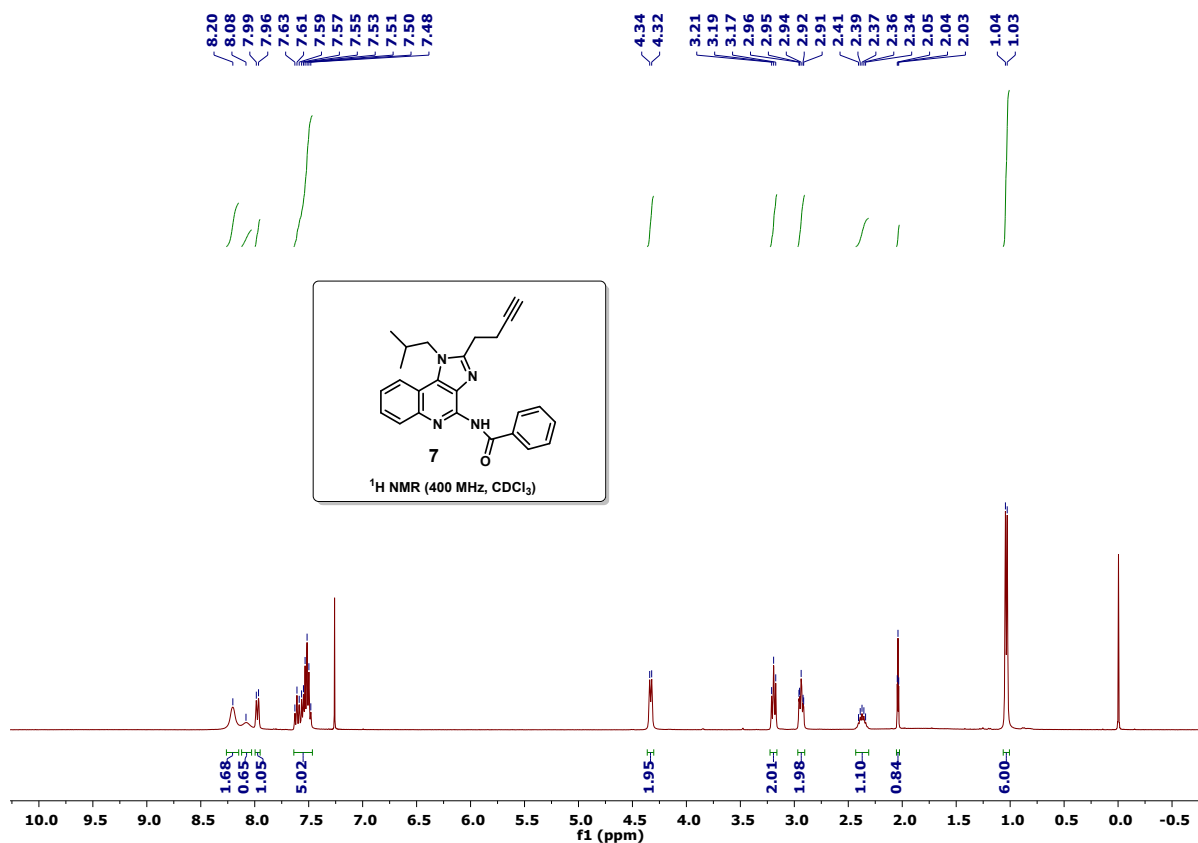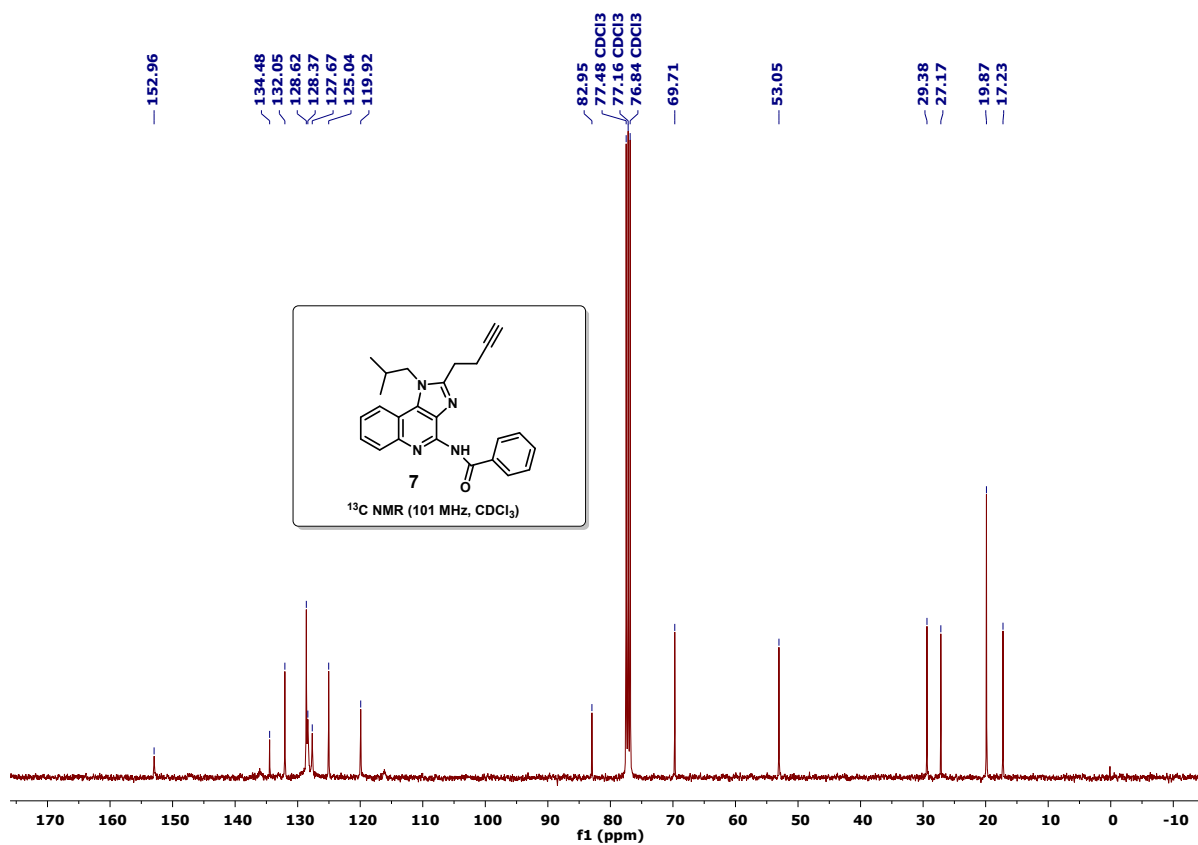

Sample Name : HMS-AN-396  
Data File : 29072022.2.lcd  
Date Acquired : 7/29/2022 2:20:12 PM  
Batch File : 29072022.lch

MS Spectrum  
D:\DATA\JULY-2022\29072022.2.lcd

SingleESI Positive+  
Spectrum Mode:Single 0.338(21)  
[CPS]

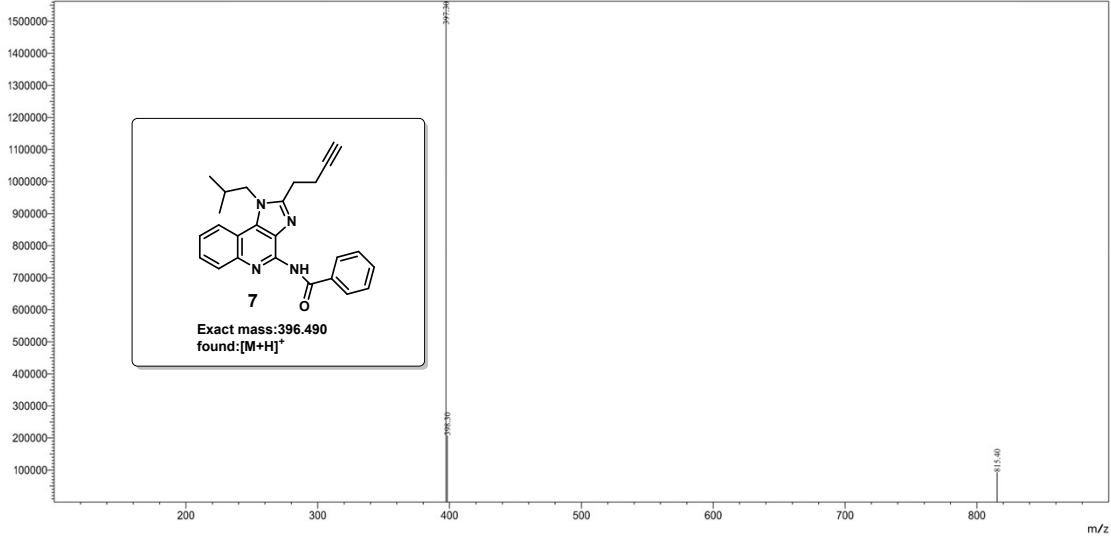

### 8. 2-(but-3-yn-1-yl)-1-isobutyl-1H-imidazo[4,5-c]quinolin-4-amine

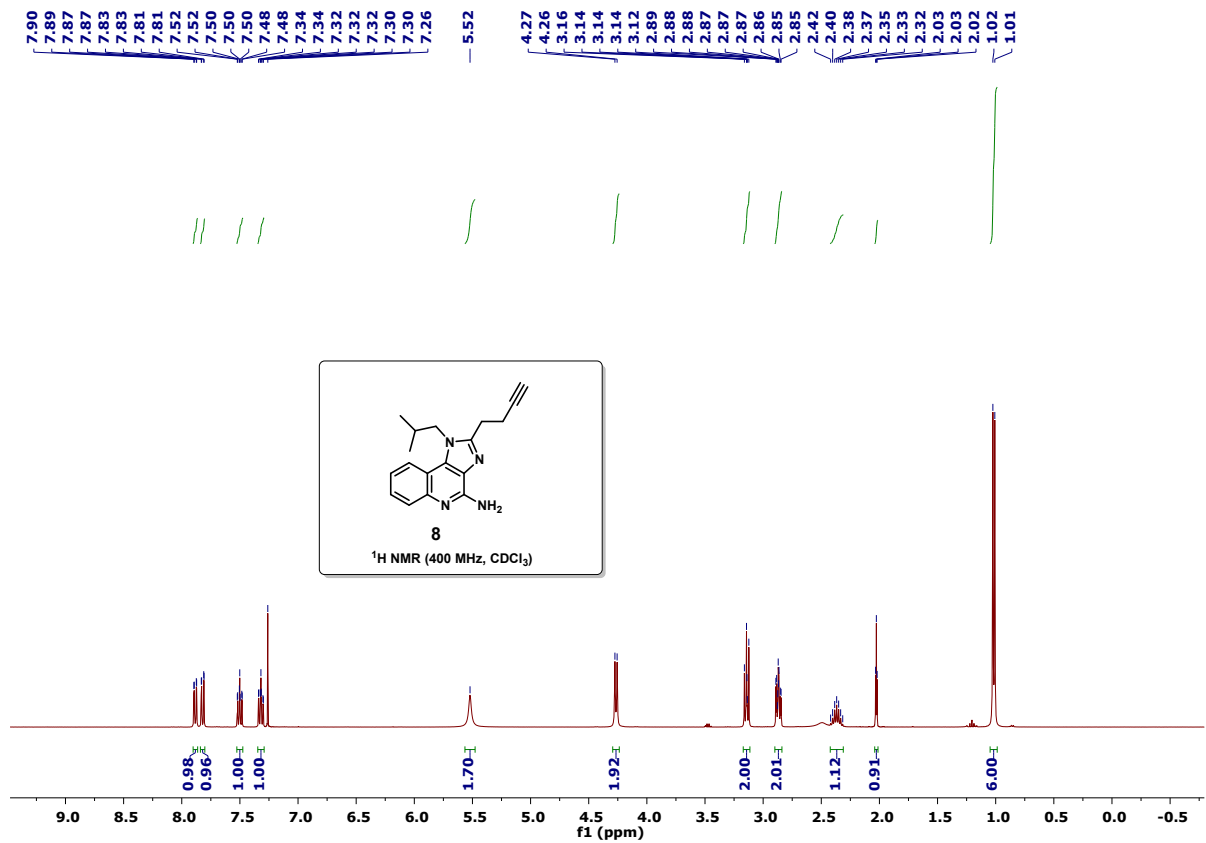

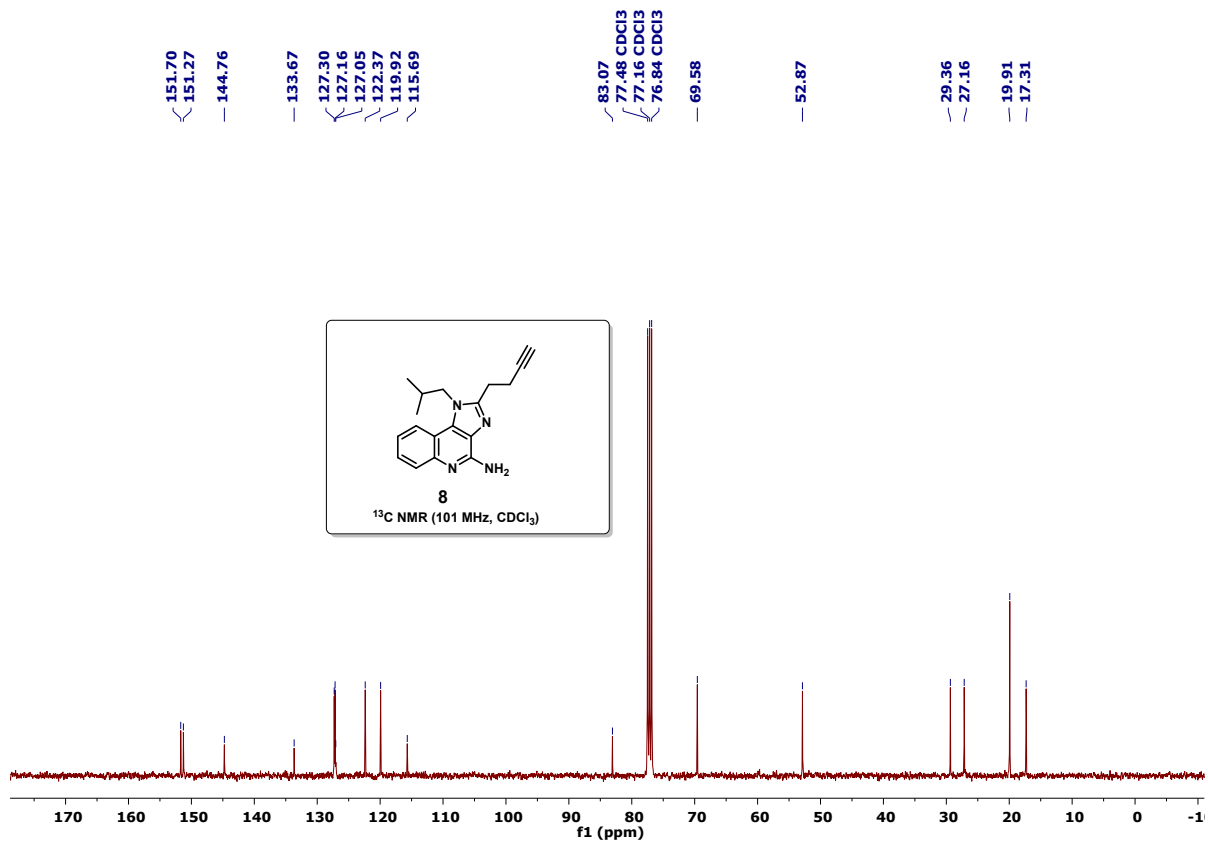

OSPC, Dr RATHOD

SHIMADZU  
LabSolutions

## MASS REPORT

Sample Name : HMS-AN-292  
Data File : 29012021.44.lcd  
Date Acquired : 1/29/2021 1:27:19 PM  
Batch File : 29012021.lcb

MS Spectrum  
D:\DATA\UAN2021\29012021.44.lcd

Single ESI Positive+  
Spectrum Mode: Single 0.569(245)

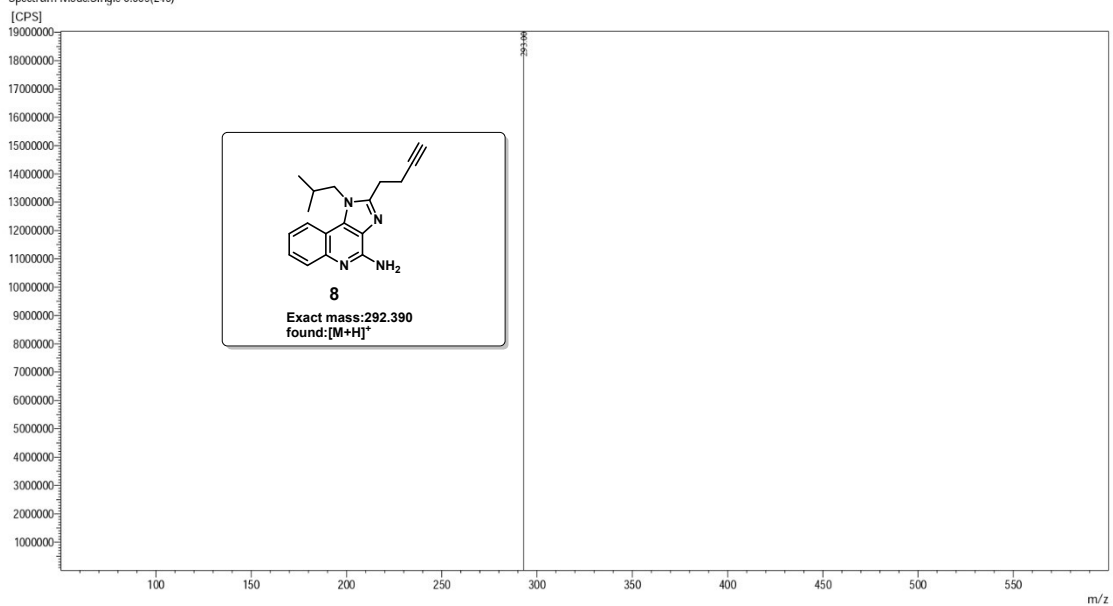

1

Created on: Oct 01, 2021

Item name: 20200728\_Elemental Composition Sep 30, 2021 11:18:40 India Standard Time

Created time: 10:05:40 India Standard Time

Item name: HMS-AN-FACETYL-292

Item name: HMS-AN-FACETYL-292, Sample position: 2:D,1, Replicate number: 1

|   | Component name | Observed neutral mass (Da) | Neutral mass (Da) | Observed m/z | Mass error (ppm) | Adducts |
|---|----------------|----------------------------|-------------------|--------------|------------------|---------|
| 1 | C18H20N4       | 292.1694                   | 292.16880         | 293.1767     | 2.2              | +H      |

Component name: C18H20N4

Item name: HMS-AN-FACETYL-292  
Item description:

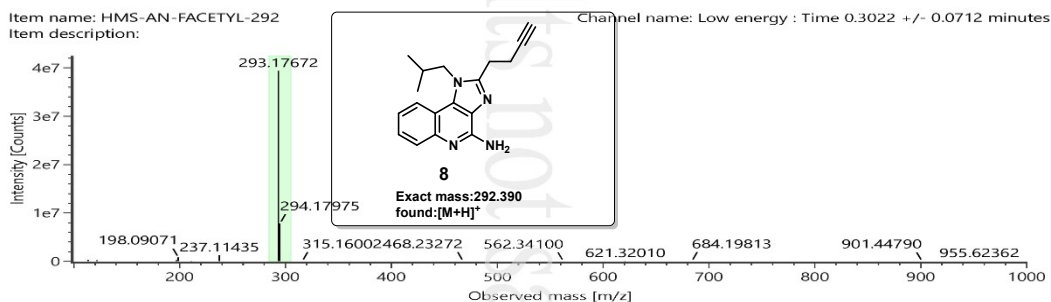

### 9a. 1-isobutyl-2-(2-(1-phenyl-1H-1,2,3-triazol-4-yl)ethyl)-1H-imidazo[4,5-c]quinolin-4-amine

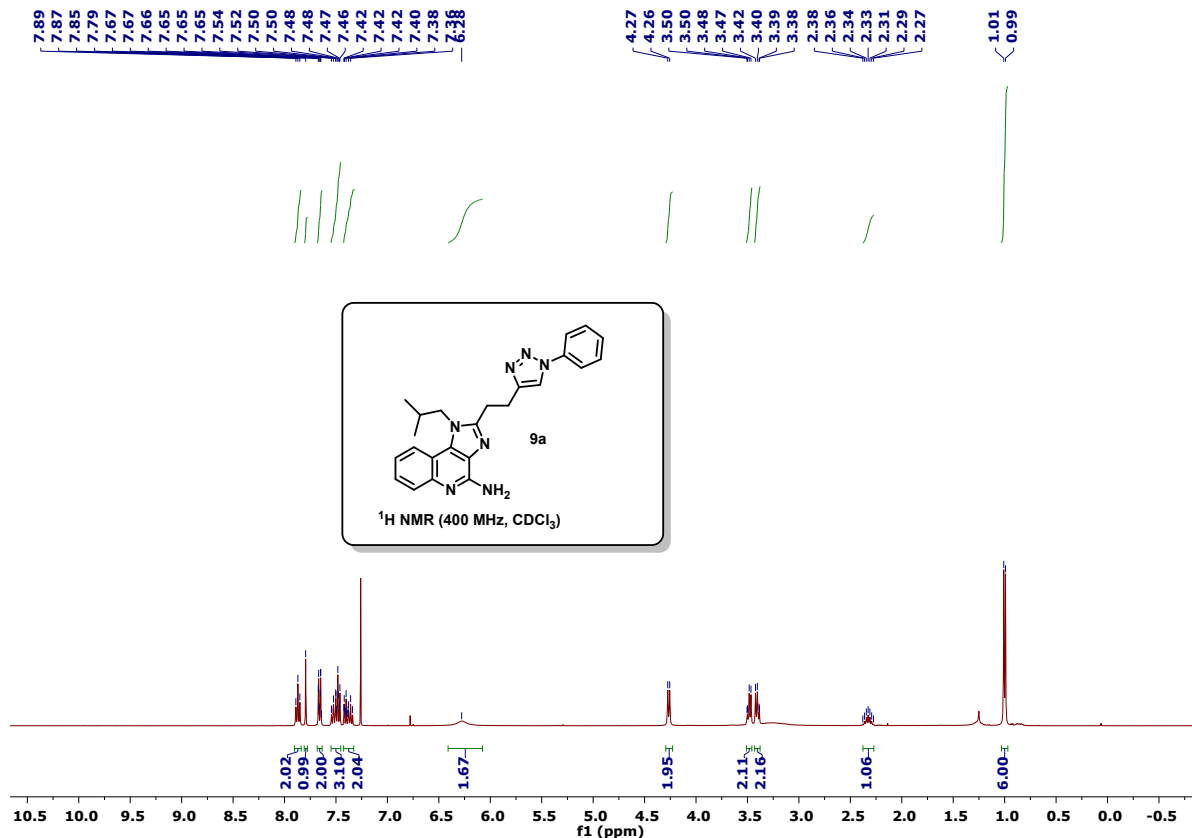



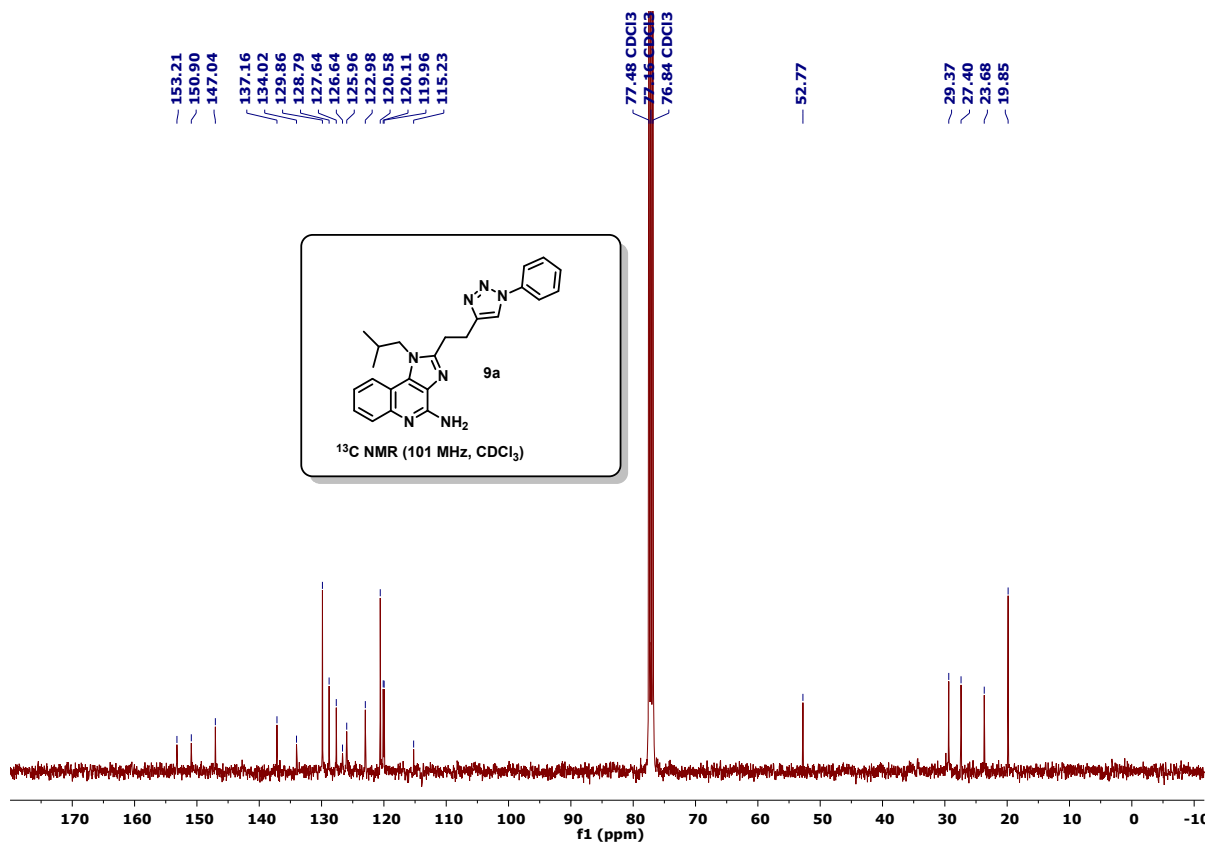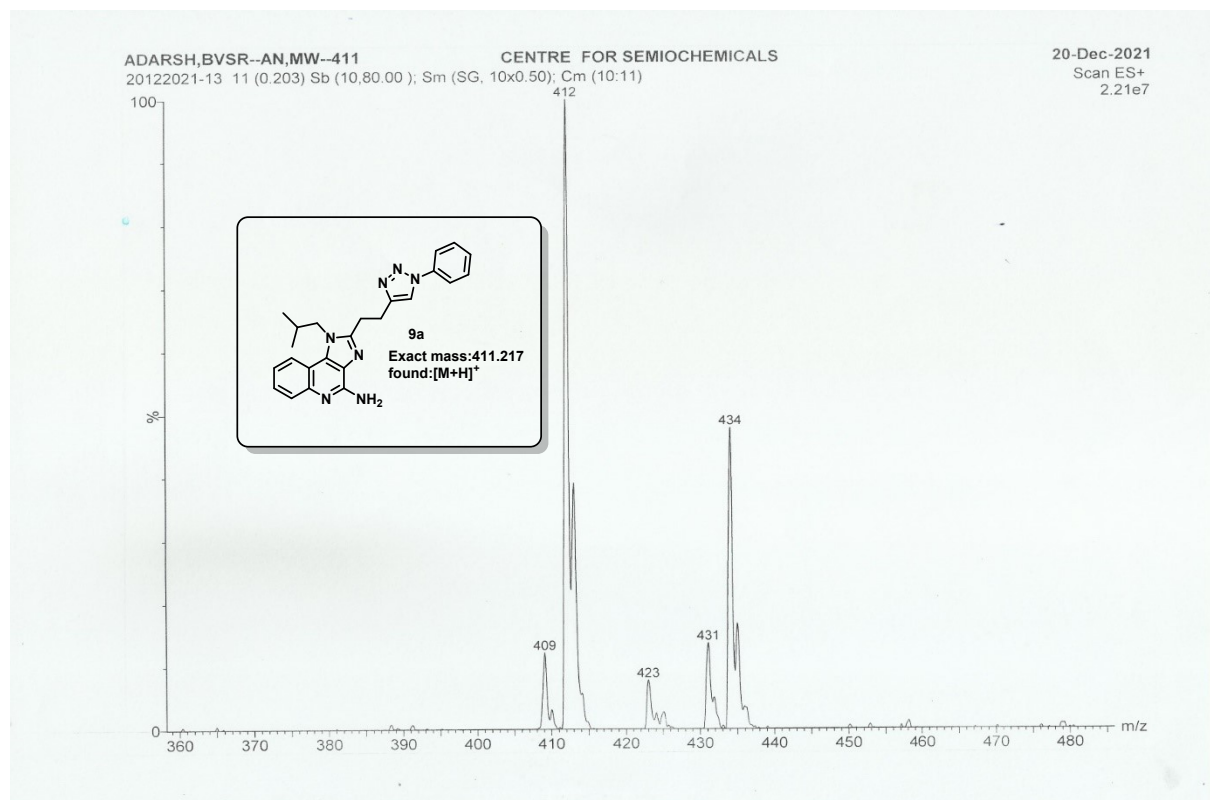

Item name: HRMS Elemental composition Mar 07, 2022 16:47:47 India Standard Time

Created time: 17:15:49 India Standard Time

**Item name: HMSAN-AN-411**

Item name: HMSAN-AN-411, Sample position: 1:B,3, Replicate number: 1

| Component name | Observed neutral mass (Da) | Neutral mass (Da) | Observed m/z | Mass error (ppm) | Adducts |
|----------------|----------------------------|-------------------|--------------|------------------|---------|
| C24H25N7       | 411.2168                   | 411.21714         | 412.2240     | -0.9             | +H      |

**Component name: C24H25N7**

Item name: HMSAN-AN-411

Item description:

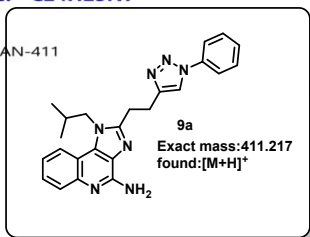

Channel name: Low energy : Time 0.3801 +/- 0.1800 minutes

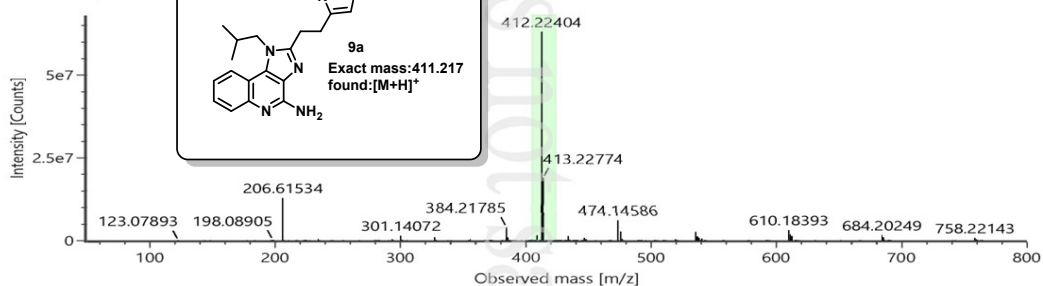

### 9b.2-(2-(1-(4-bromophenyl)-1H-1,2,3-triazol-4-yl)ethyl)-1-isobutyl-1H-imidazo[4,5-c]quinolin-4-amine

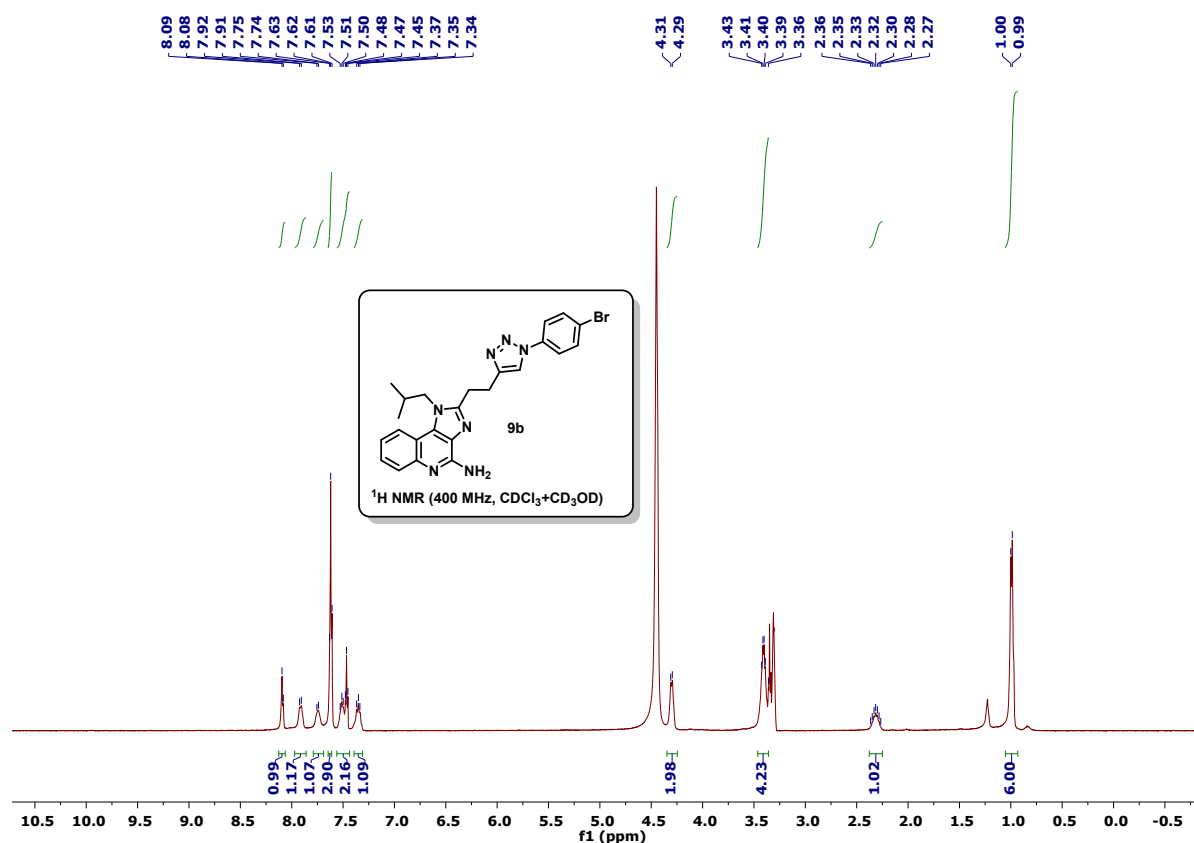

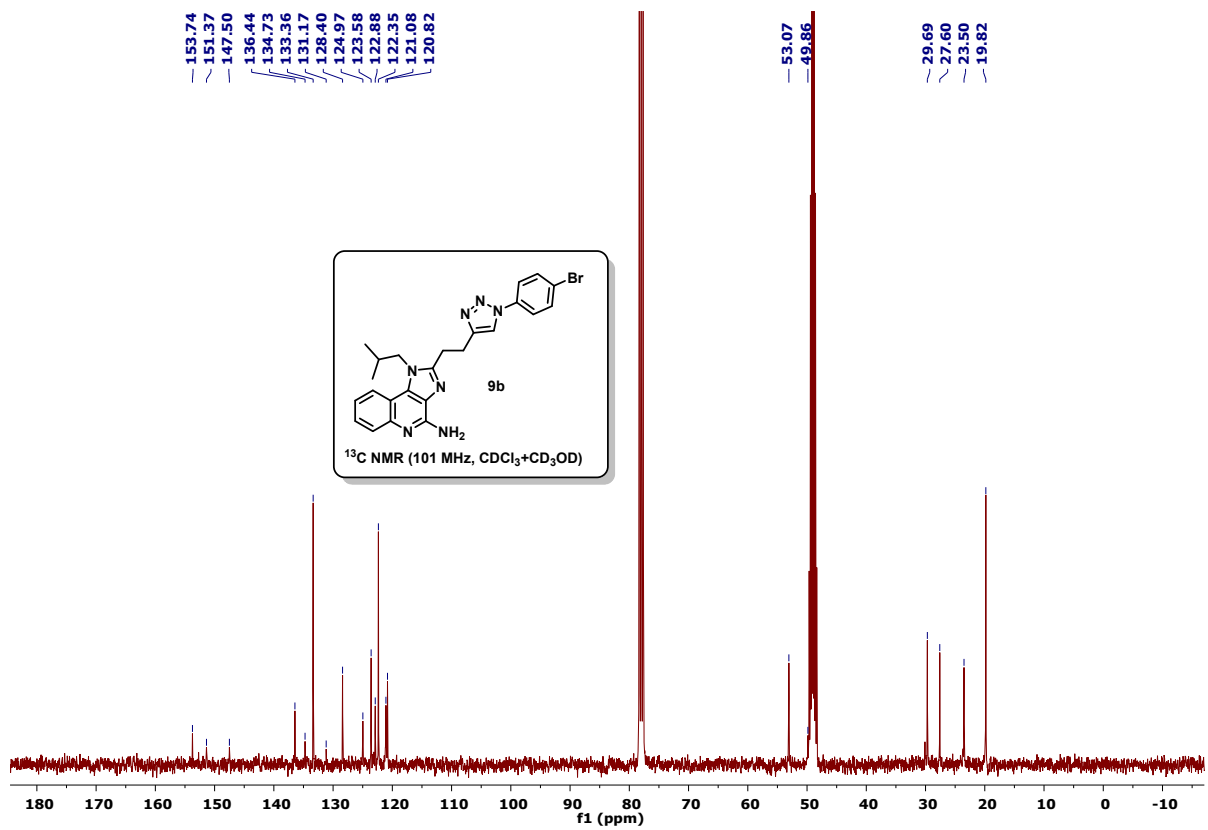

10/28/2022 2:14:36 PM Page 1 / 1

====Department of Organic Synthesis and Process Chemistry, CSIR-IITC====

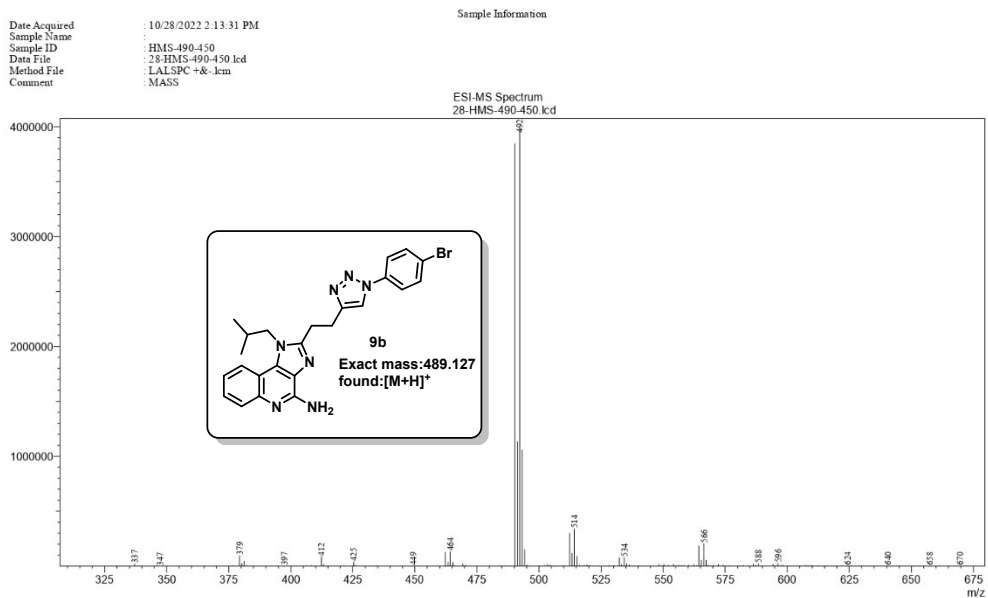

D:\Data\MASS\OCT-2022\28-HMS-490-450.lcd

Item name: 20200728\_Elemental Compostion Sep 30, 2021 11:18:40 India Standard Time

Created time: 10:07:45 India Standard Time

Item name: HMS-AN-4BR-49D4

Item name: HMS-AN-4BR-49D4, Sample position: 2:D,2, Replicate number: 1

|   | Component name | Observed neutral mass (Da) | Neutral mass (Da) | Observed m/z | Mass error (ppm) | Adducts |
|---|----------------|----------------------------|-------------------|--------------|------------------|---------|
| 1 | C24H24BrN7     | 489.1276                   | 489.12766         | 490.1348     | -0.2             | +H      |

Component name: C24H24BrN7

Item name: HMS-AN-4BR-49D4  
Item description:

Channel name: Low energy : Time 0.3076 +/- 0.0701 minutes

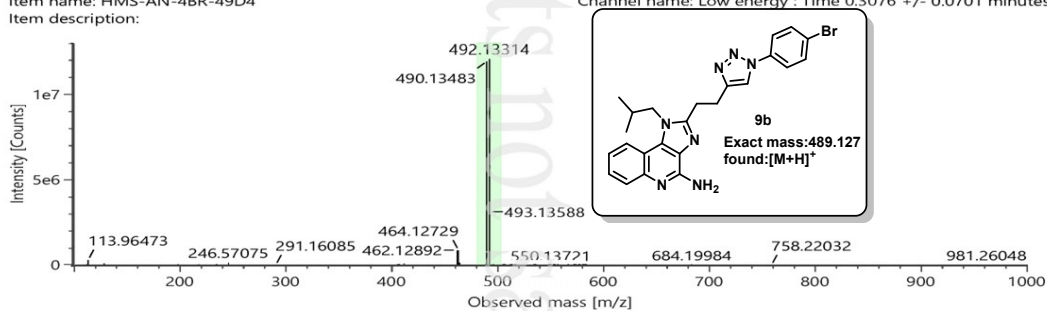

### 9c. 1-isobutyl-2-(2-(1-(4-isopropylphenyl)-1H-1,2,3-triazol-4-yl)ethyl)-1H-imidazo[4,5-c]quinolin-4-amine

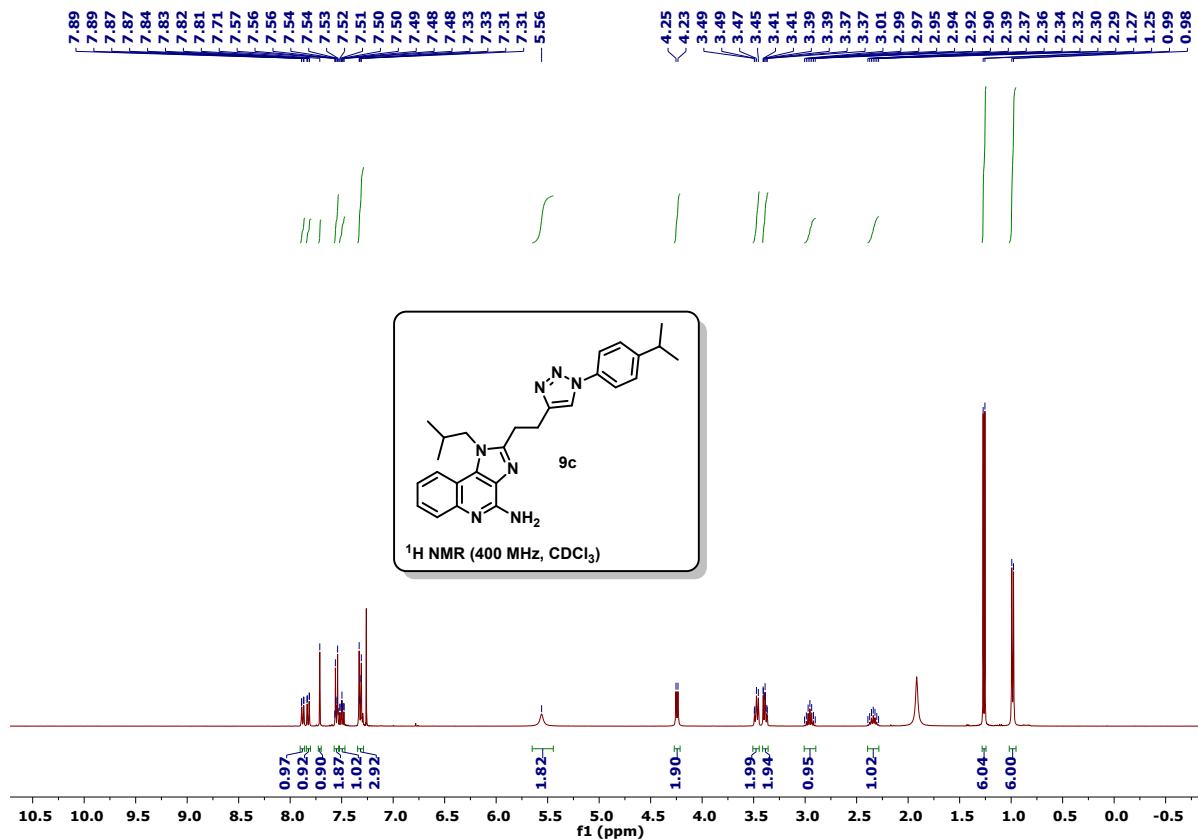

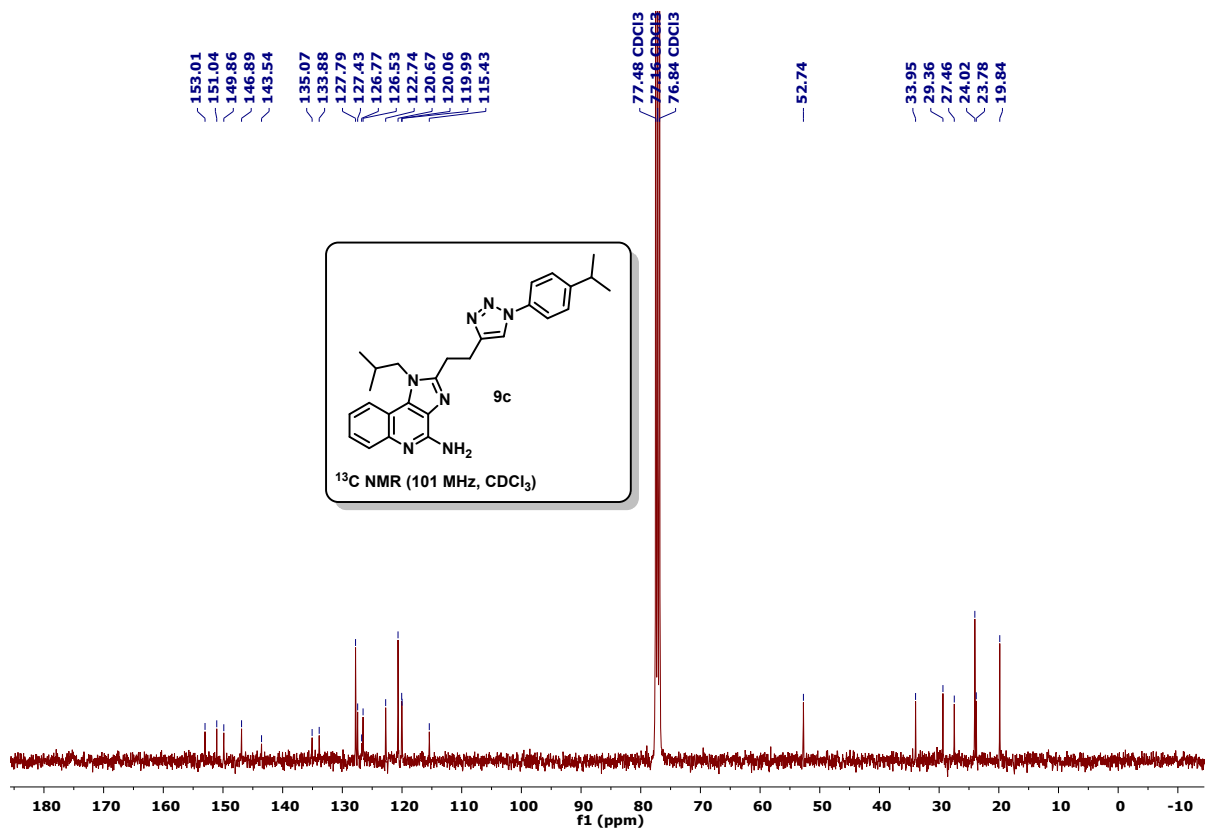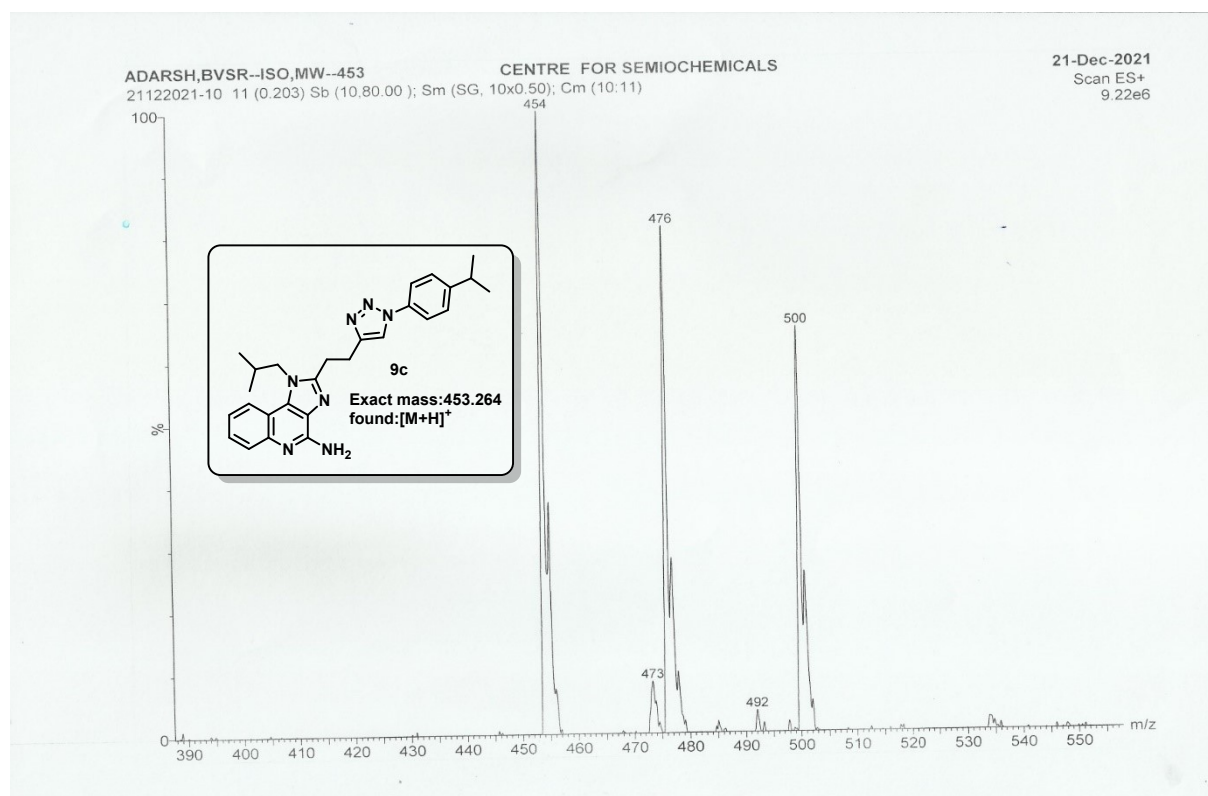

1  
07/26/22 16:19:24  
HMS-AN-ISO #2-15 RT: 0.04-0.19 AV: 7 NL: 1.50E8  
T: FTMS (1,1) + p ESI Full ms [100.00-2000.00]

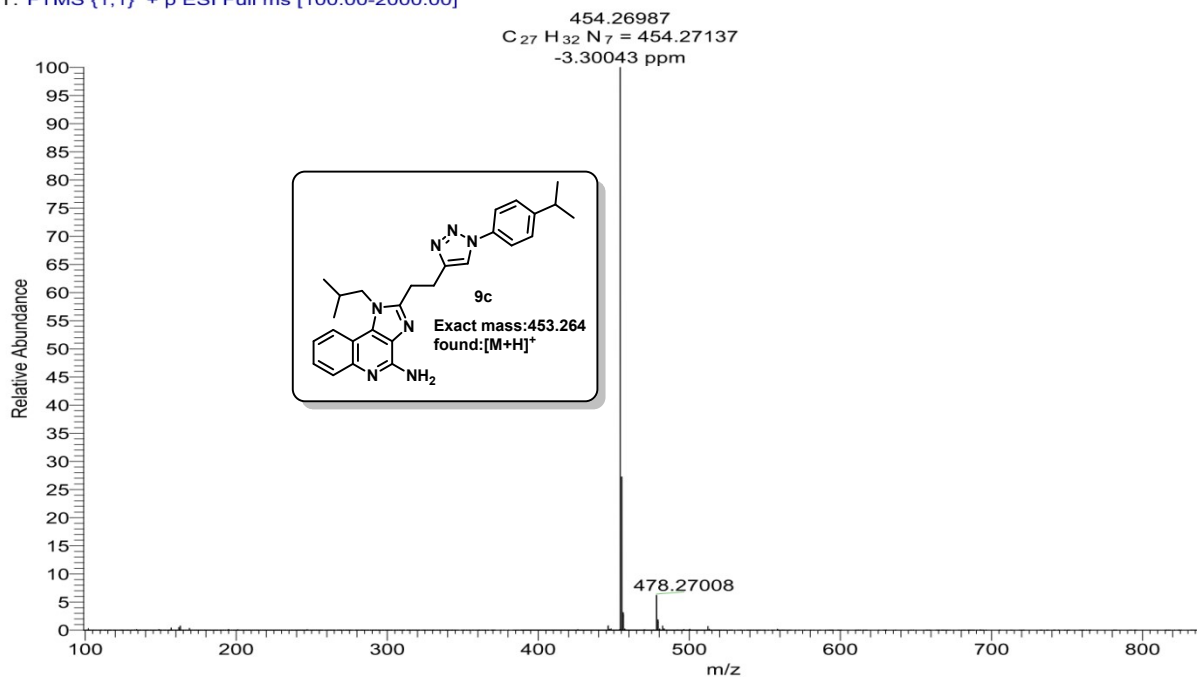

### 9d. 2-(2-(1-(4-(tert-butyl)phenyl)-1H-1,2,3-triazol-4-yl)ethyl)-1-isobutyl-1H-imidazo[4,5-c]quinolin-4-amine

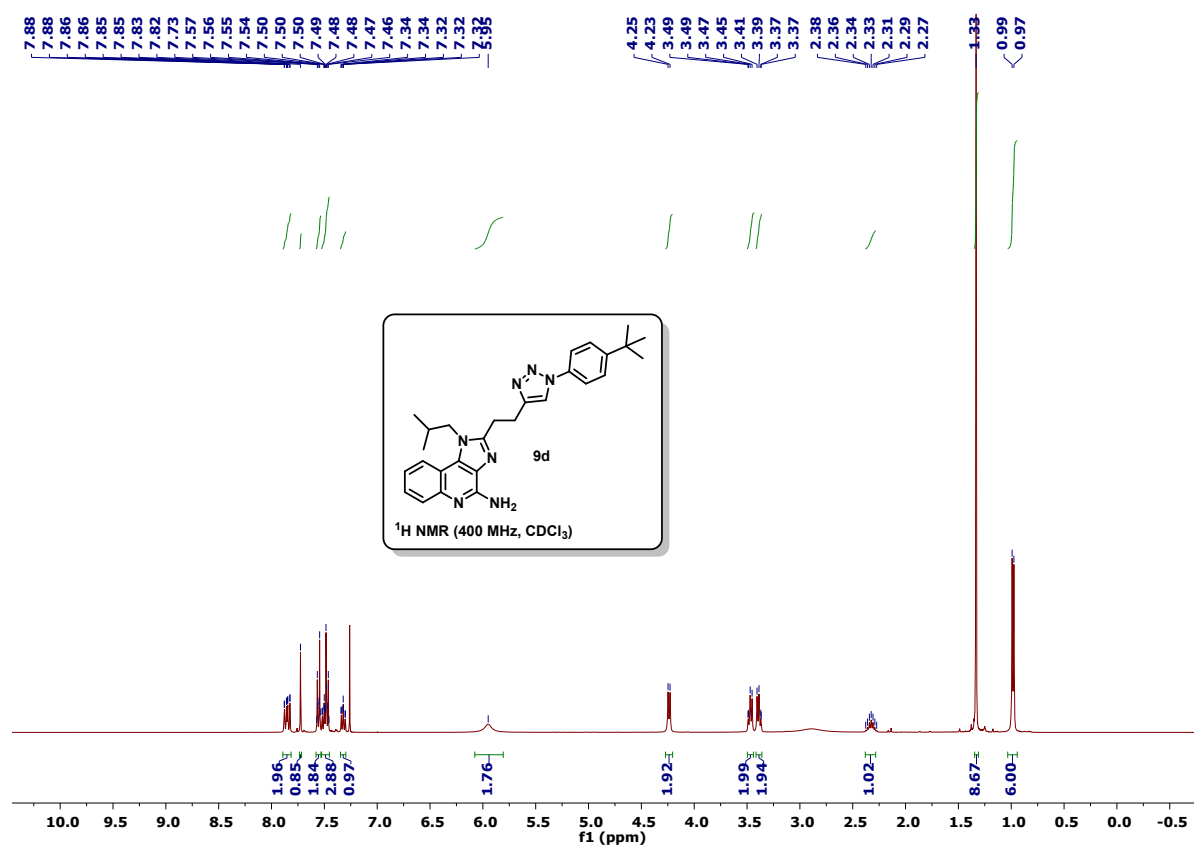

153.07  
 152.02  
 151.04  
 146.83  
 143.01  
 134.67  
 133.85  
 127.44  
 126.64  
 126.01  
 122.73  
 120.19  
 120.06  
 119.97  
 115.19  
 77.48 CDCl<sub>3</sub>  
 77.16 CDCl<sub>3</sub>  
 76.84 CDCl<sub>3</sub>  
 52.65  
 34.82  
 31.33  
 29.28  
 27.39  
 23.62  
 19.77

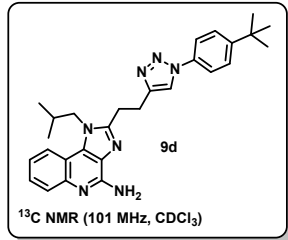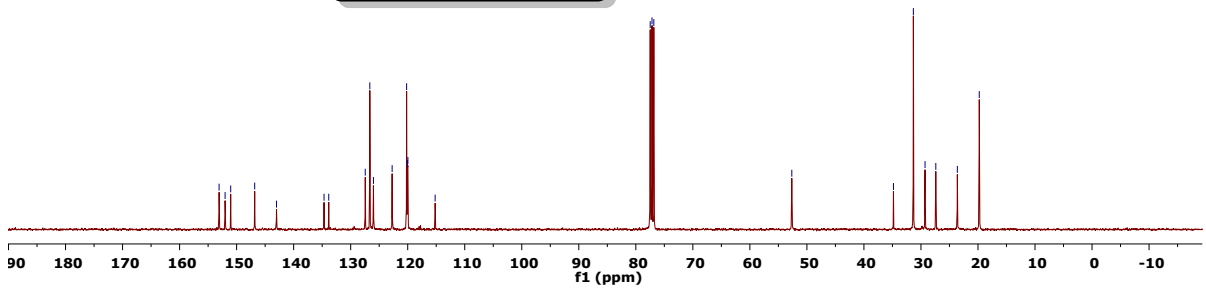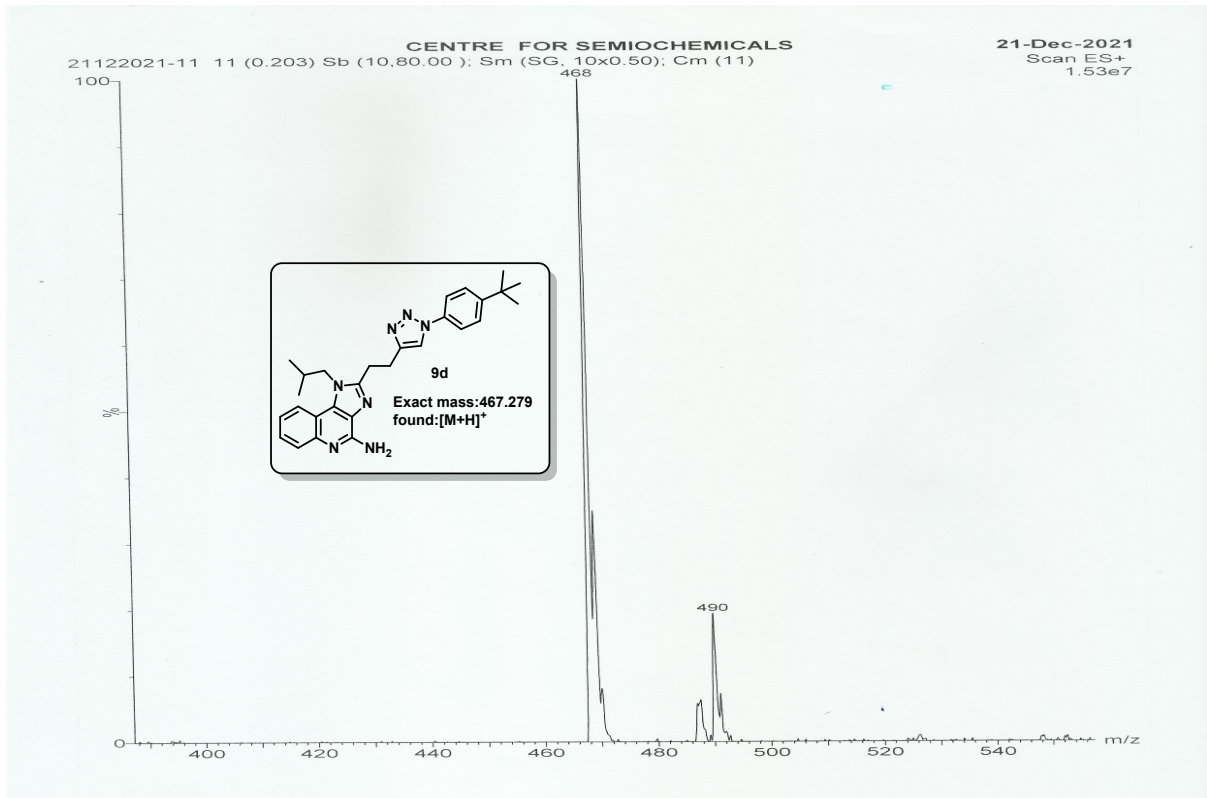

Item name: HRMS Elemental composition Mar 07, 2022 16:47:47 India Standard Time

Created time: 17:20:41 India Standard Time

**Item name: HMSAN-TERT-467**

Item name: HMSAN-TERT-467, Sample position: 1:B,4, Replicate number: 1

| Component name | Observed neutral mass (Da) | Neutral mass (Da) | Observed m/z | Mass error (ppm) | Adducts |    |
|----------------|----------------------------|-------------------|--------------|------------------|---------|----|
| 1              | C28H33N7                   | 467.2796          | 467.27974    | 468.2868         | -0.4    | +H |

**Component name: C28H33N7**

Item name: HMSAN-TERT-467  
Item description:

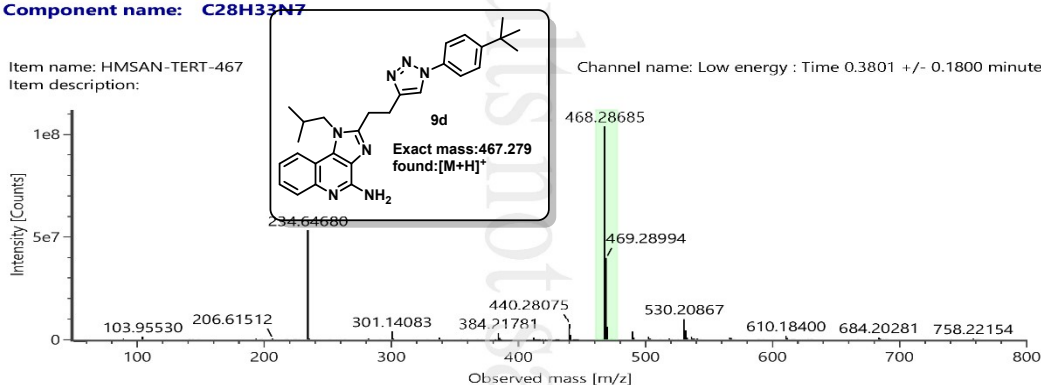

**9e. 1-isobutyl-2-(2-(1-(4-nitrophenyl)-1H-1,2,3-triazol-4-yl)ethyl)-1H-imidazo[4,5-c]quinolin-4-amine**

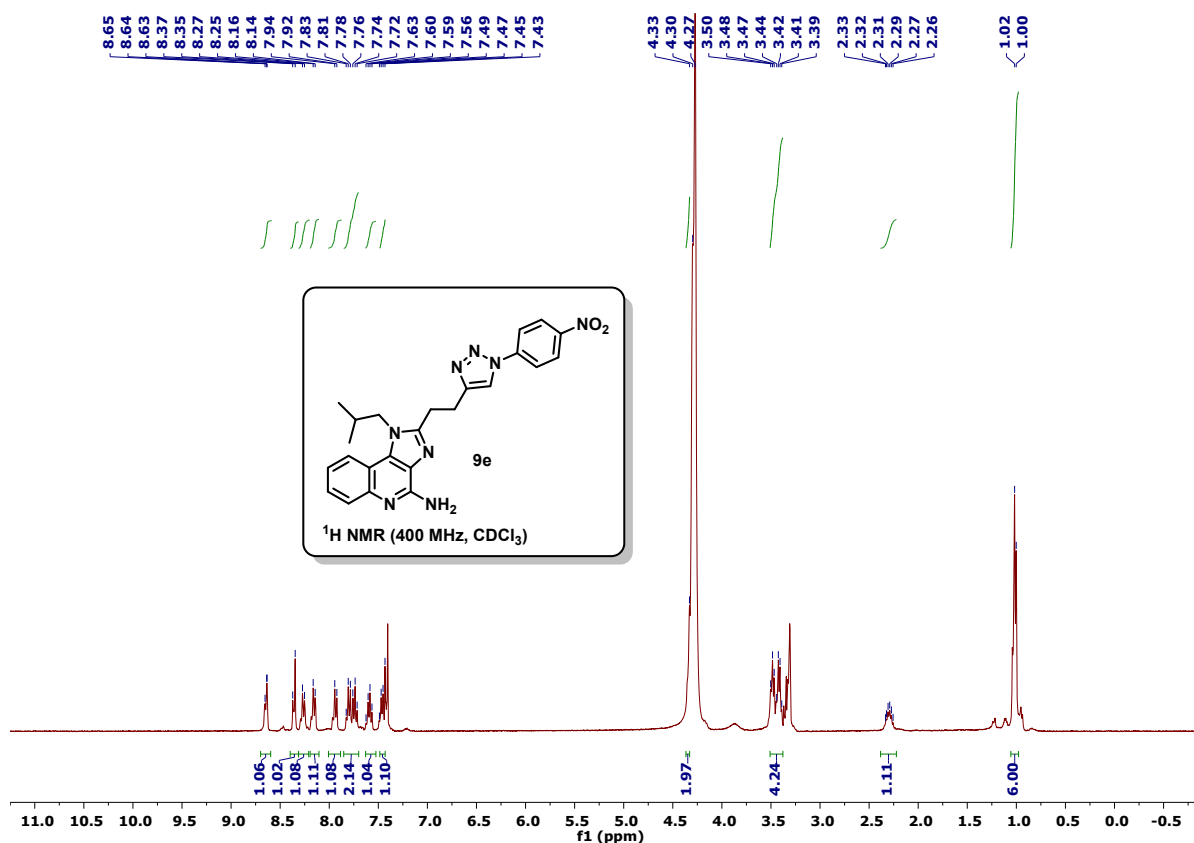



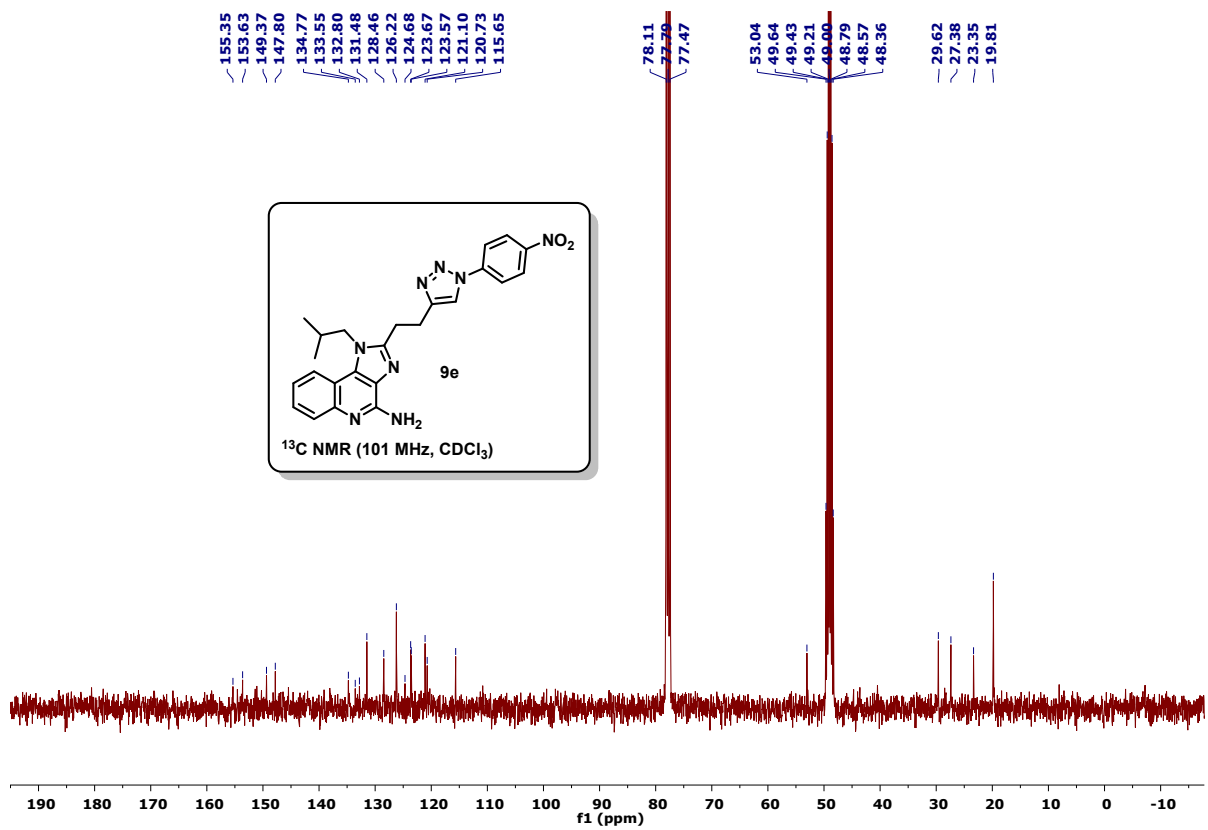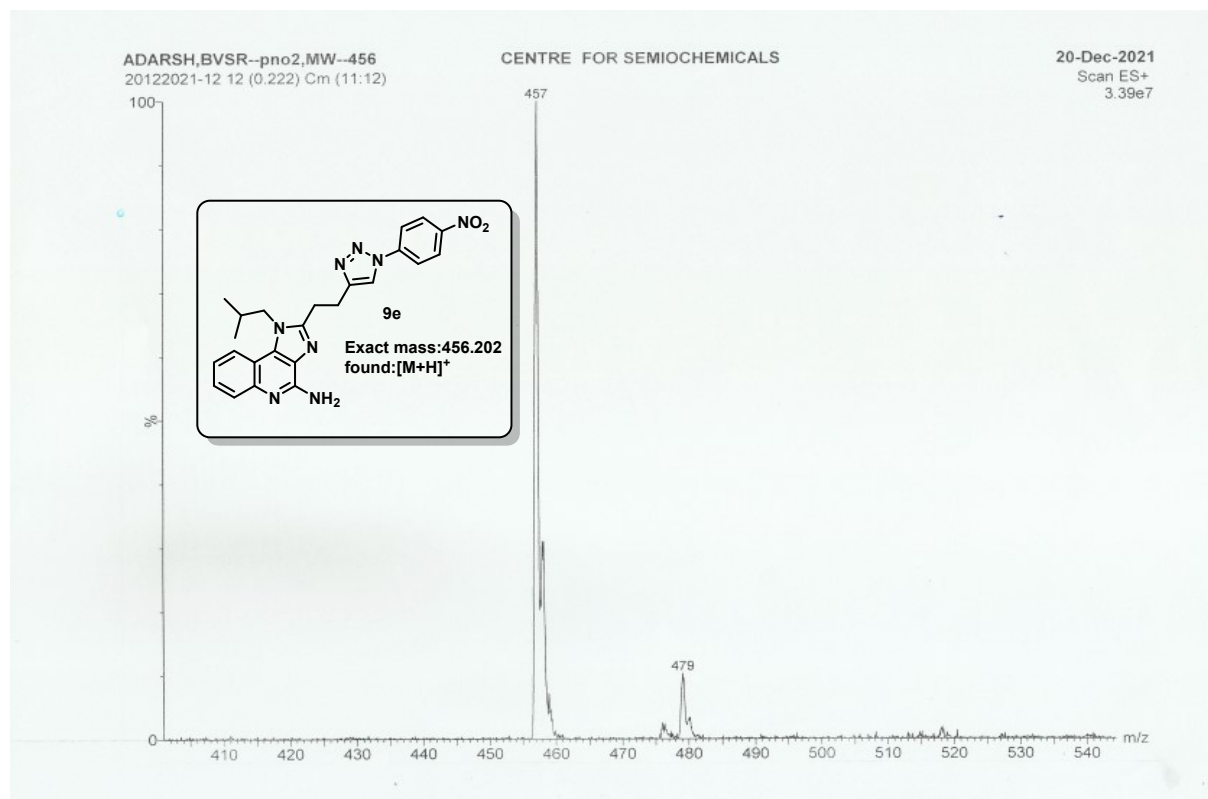

1  
07/26/22 16:15:45  
HMS-AN-456 #3-12 RT: 0.04-0.13 AV: 5 NL: 1.33E8  
T: FTMS (1,1) + p ESI Full ms [100.00-2000.00]

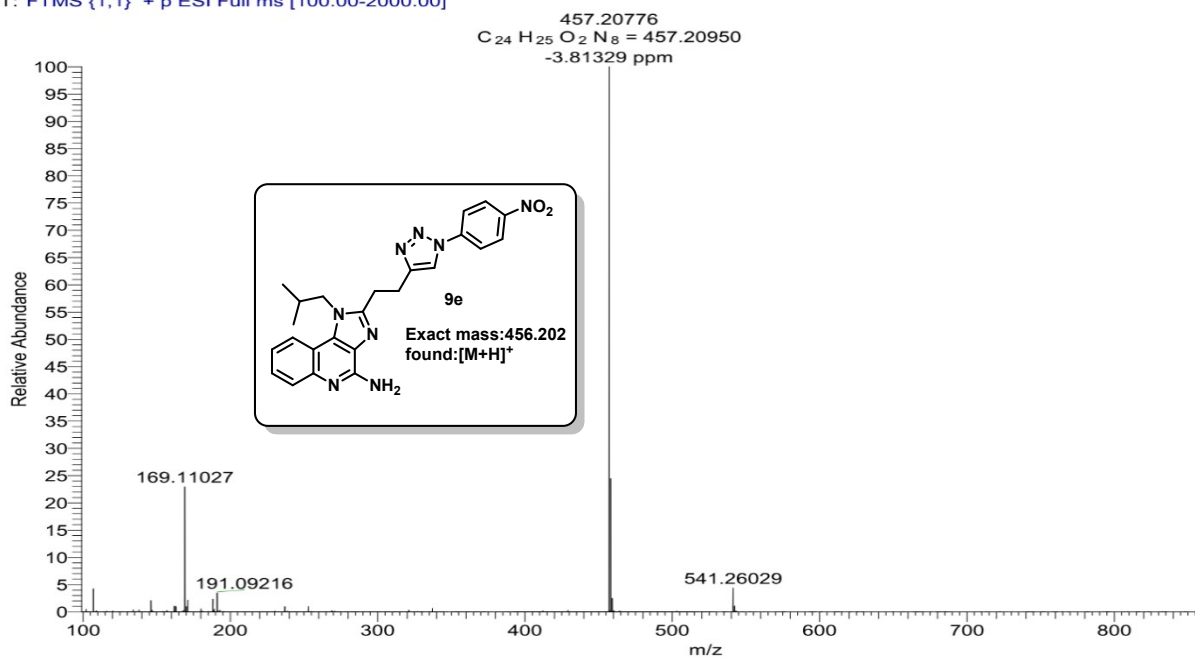

### 9f. 1-isobutyl-2-(2-(1-(4-methoxyphenyl)-1H-1,2,3-triazol-4-yl)ethyl)-1H-imidazo[4,5-c]quinolin-4-amine

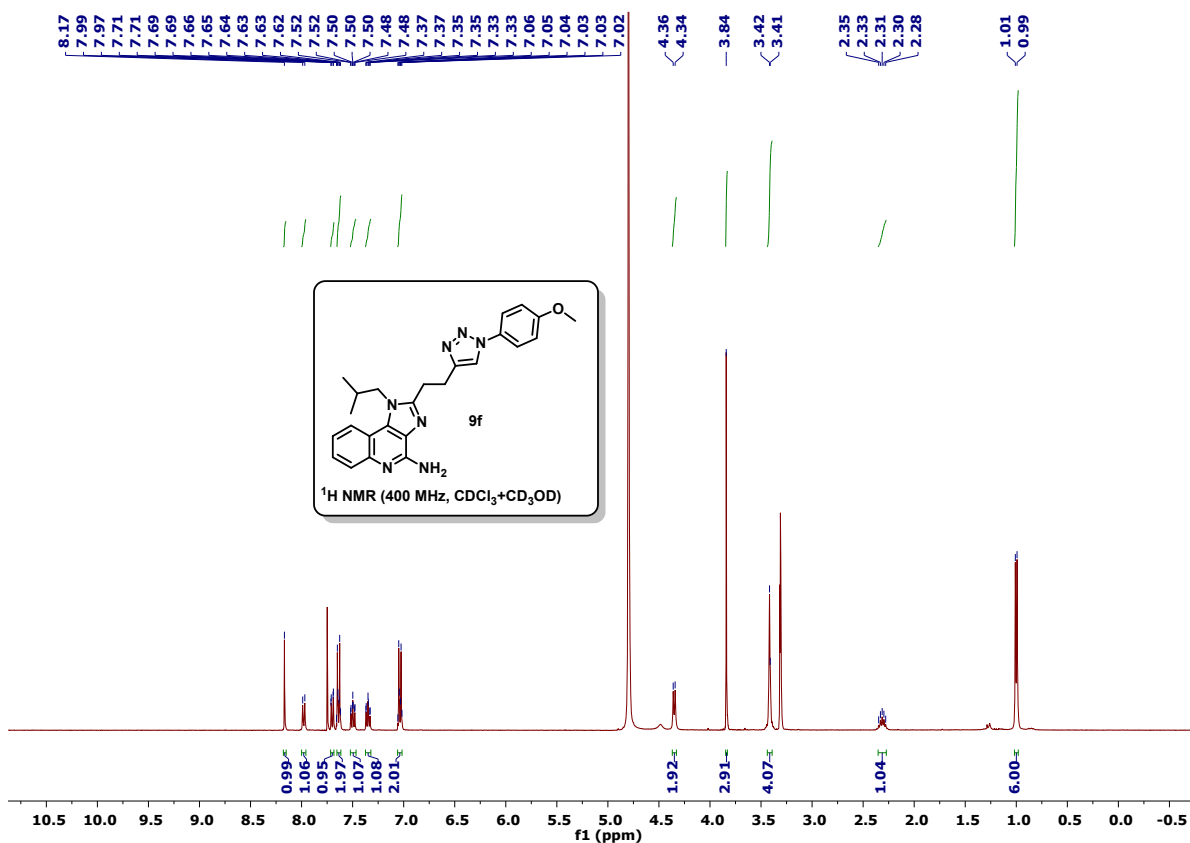

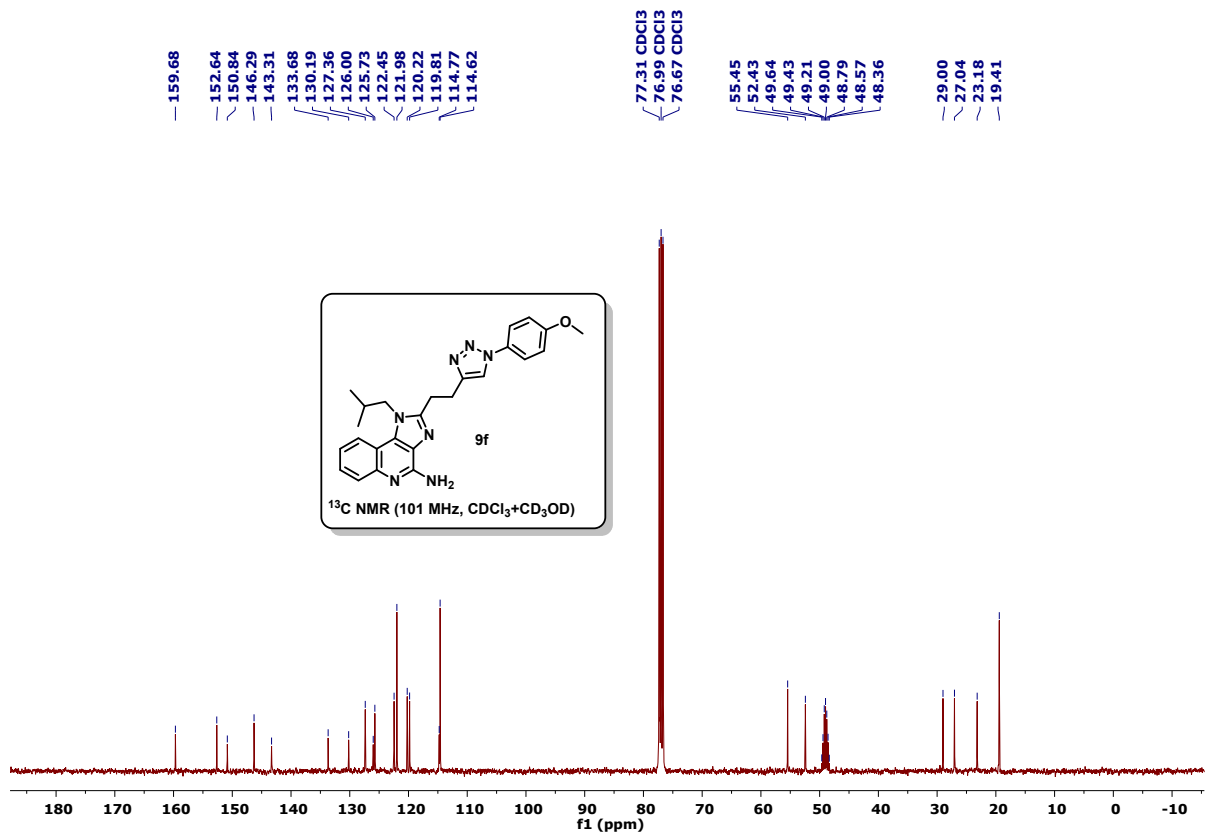

OSPC, Dr RATHOD

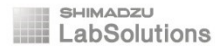

### MASS REPORT

Sample Name : HMS-AN-OME-441  
 Data File : 01102021.41.lcd  
 Date Acquired : 10/1/2021 3:11:43 PM  
 Batch File : 01102021.3.lcb

MS Spectrum  
 D:\DATA\OCT-2021\01102021.41.lcd

Averaged ESI Positive+  
 Spectrum Mode: Averaged 0.169-0.372(11-23)

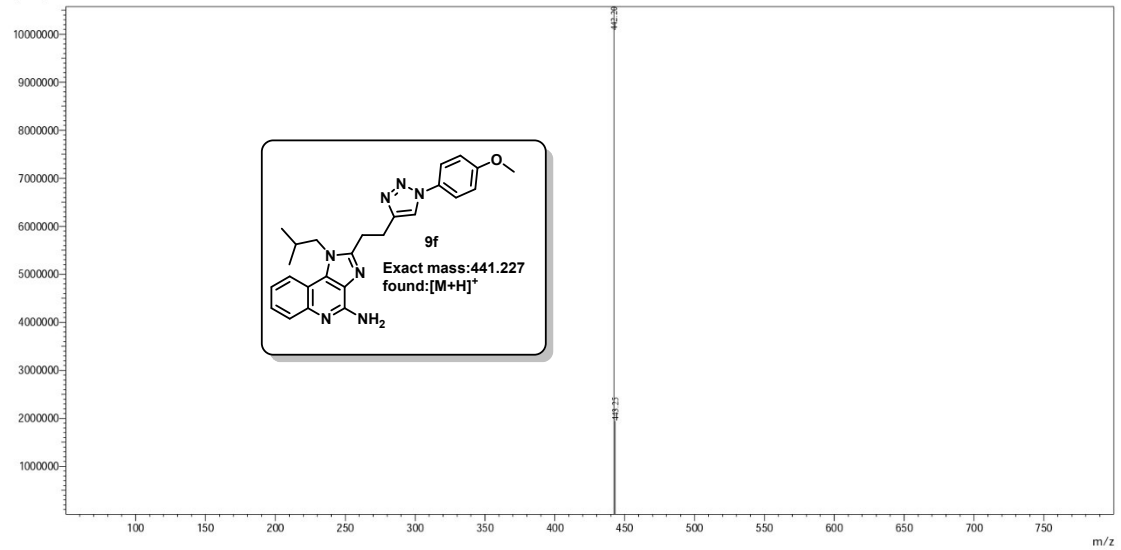

Item name: HRMS Elemental composition Mar 08, 2022 14:13:44 India Standard Time

Created time: 14:53:24 India Standard Time

**Item name: HMSAN-MA-441**

Item name: HMSAN-MA-441, Sample position: 1:C,1, Replicate number: 1

| Component name | Observed neutral mass (Da) | Neutral mass (Da) | Observed m/z | Mass error (ppm) | Adducts |    |
|----------------|----------------------------|-------------------|--------------|------------------|---------|----|
| 1              | C25H27N7O                  | 441.2275          | 441.22771    | 442.2347         | -0.6    | +H |

**Component name: C25H27N7O**

Item name: HMSAN-MA-441

Item description:

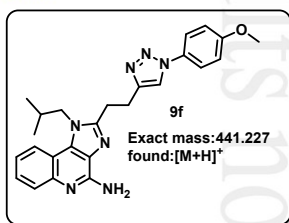

Channel name: Low energy : Time 0.3792 +/- 0.0581 minutes

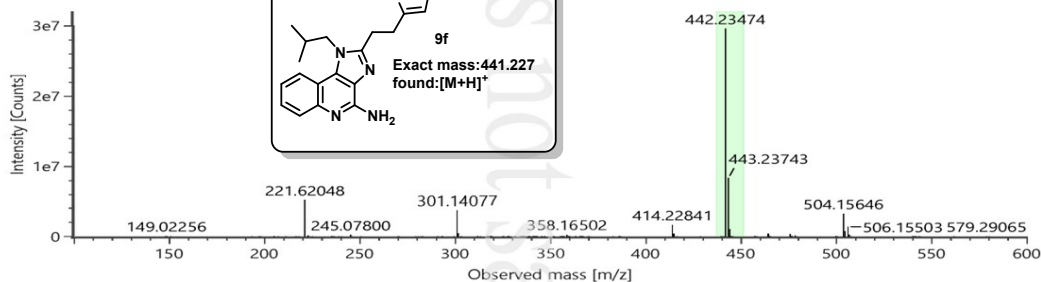

**9g. 2-(2-(1-(4-chlorophenyl)-1H-1,2,3-triazol-4-yl)ethyl)-1-isobutyl-1H-imidazo[4,5-c]quinolin-4-amine**

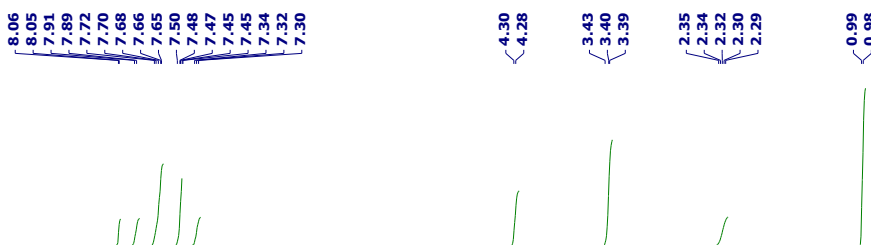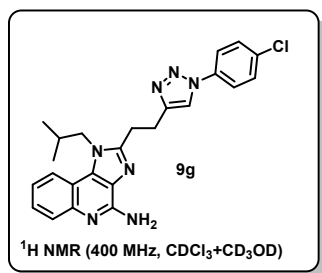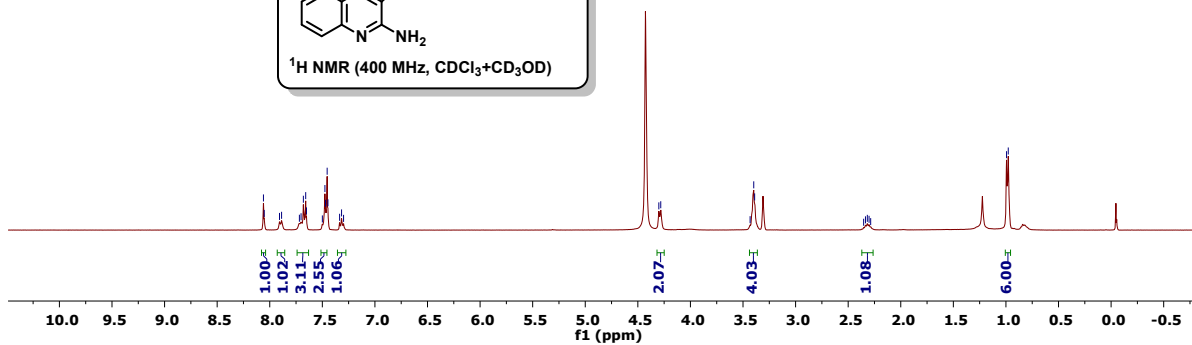

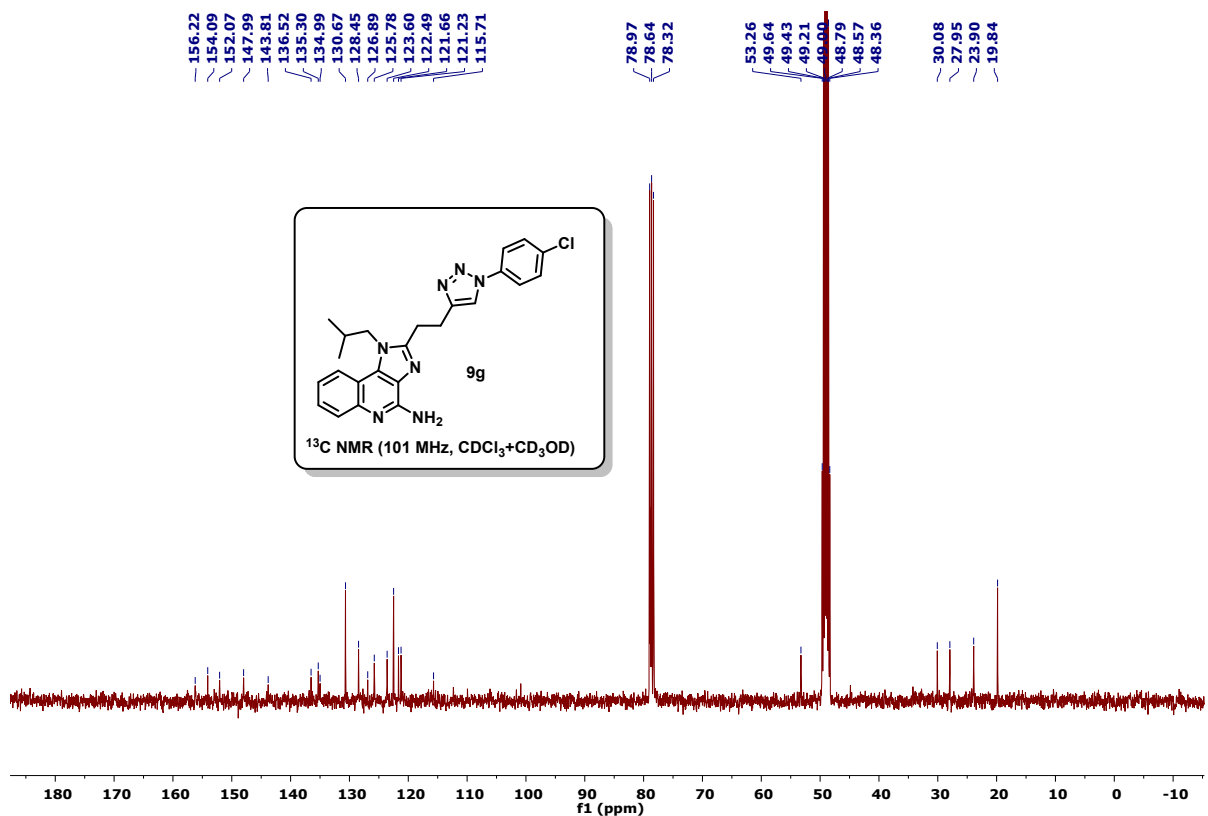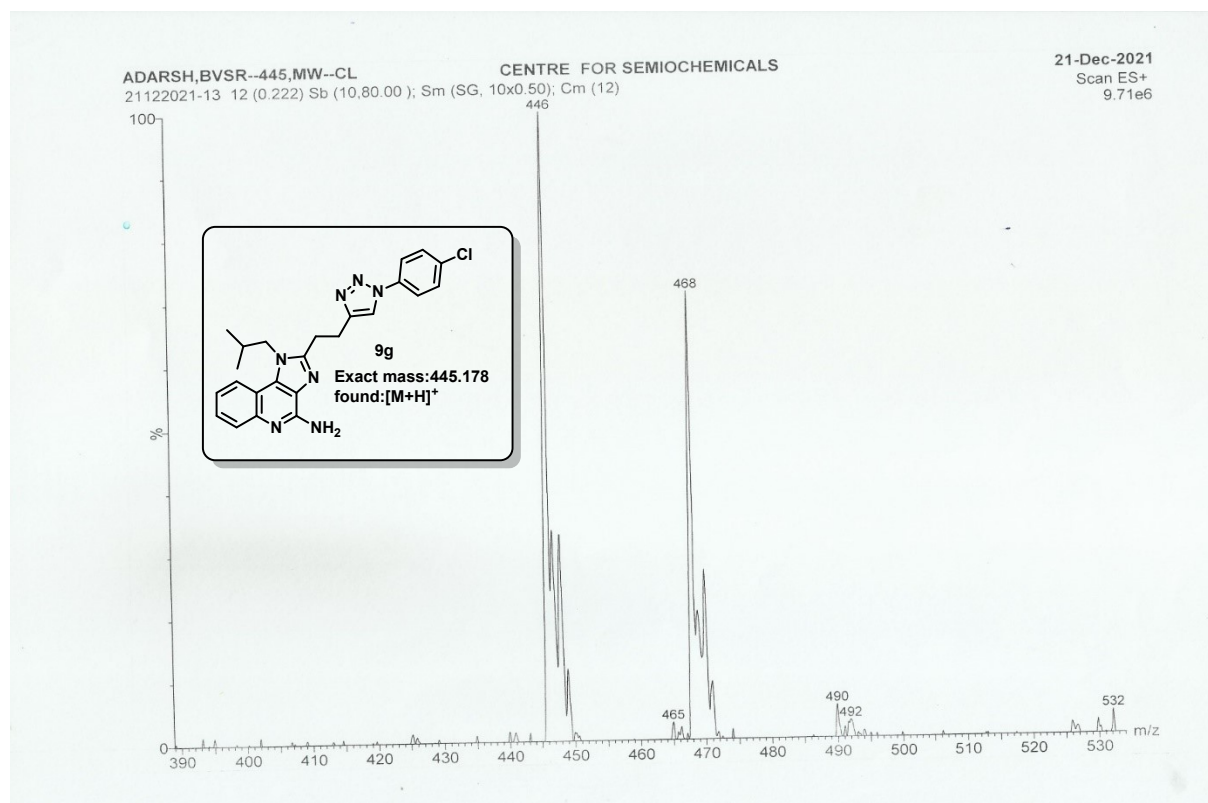

1  
07/26/22 16:12:04  
HMS-AN-CL #2-15 RT: 0.04-0.18 AV: 7 NL: 7.98E7  
T: FTMS (1,1) + p ESI Full ms [100.00-2000.00]

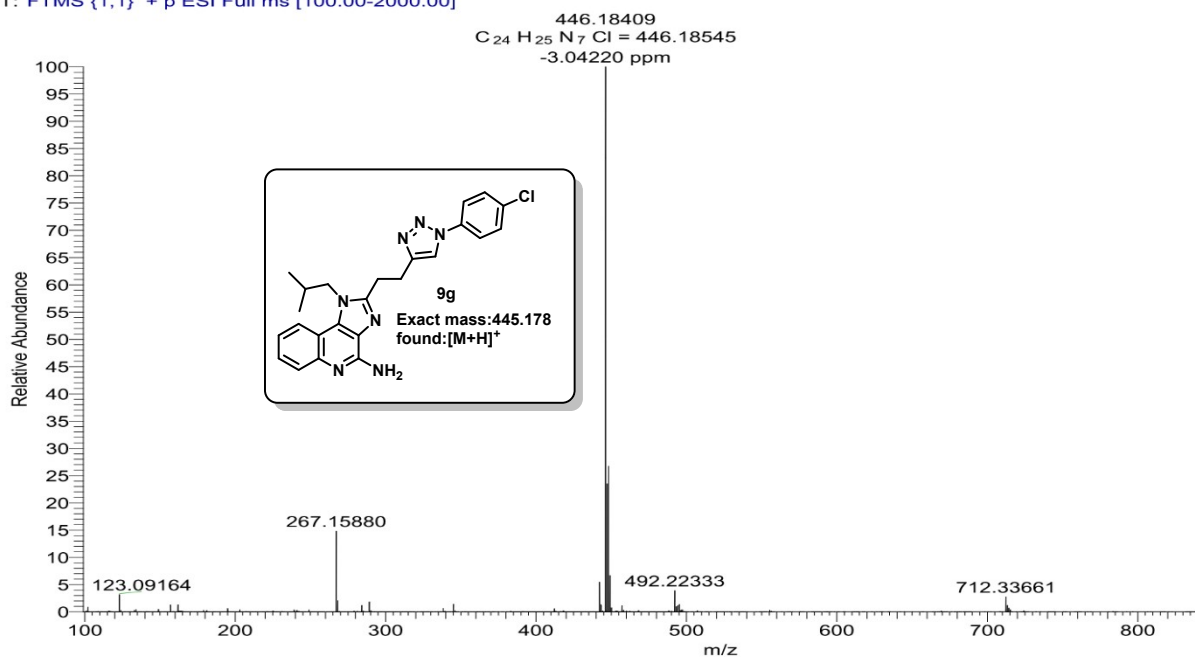

### 9h. 1-isobutyl-2-(2-(1-(3-nitrophenyl)-1H-1,2,3-triazol-4-yl)ethyl)-1H-imidazo[4,5-c]quinolin-4-amine

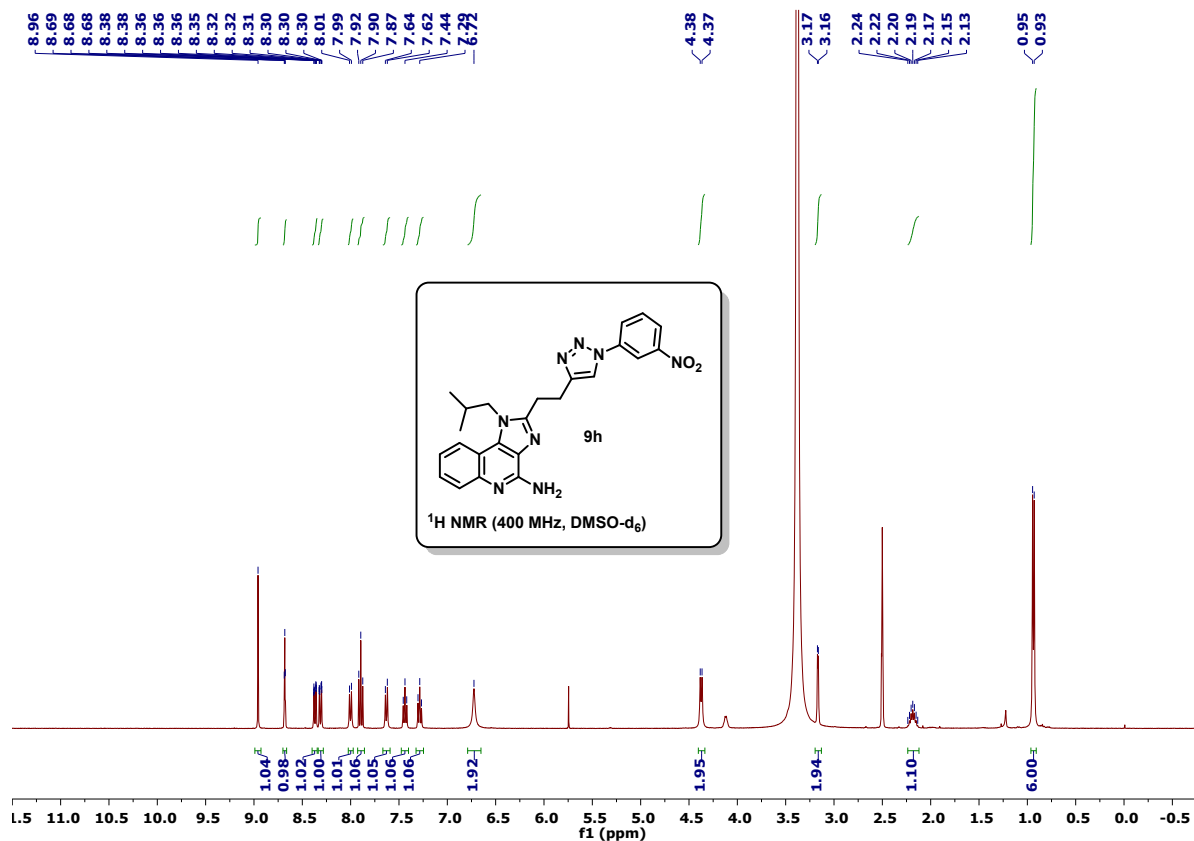

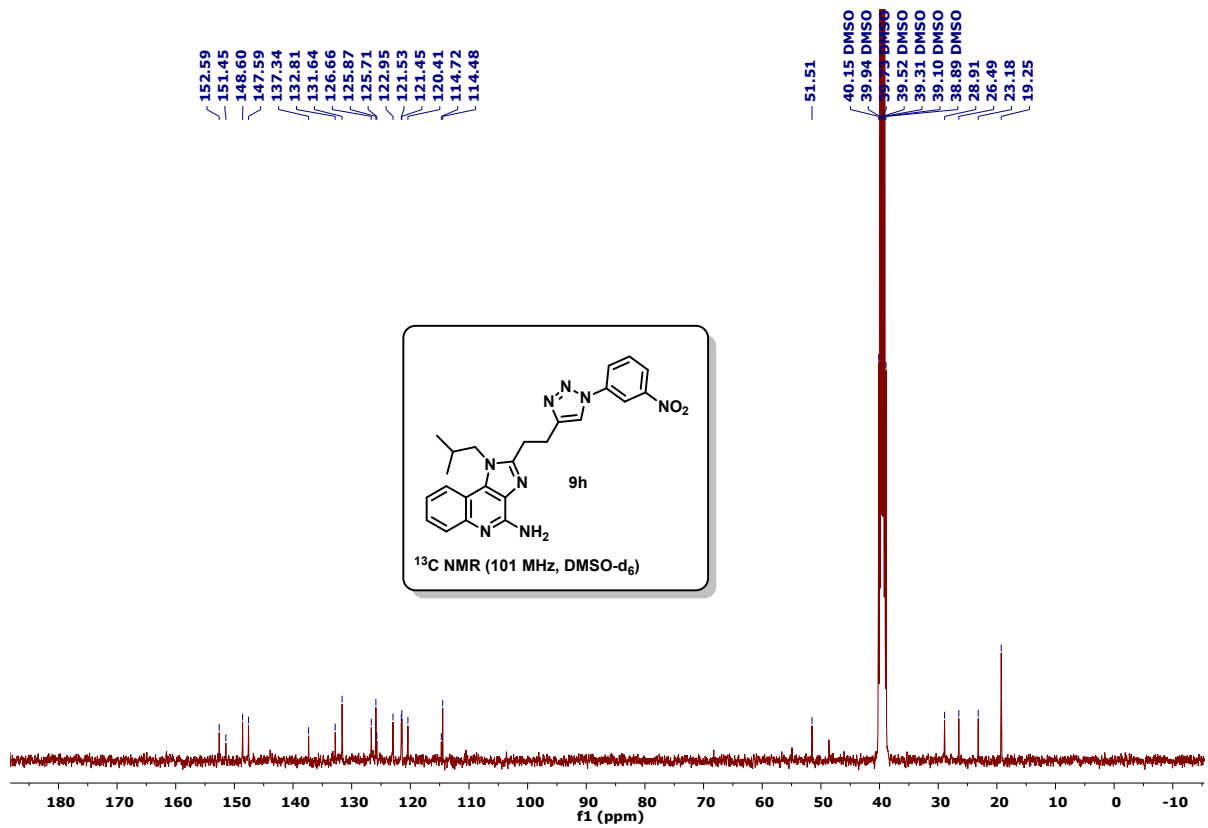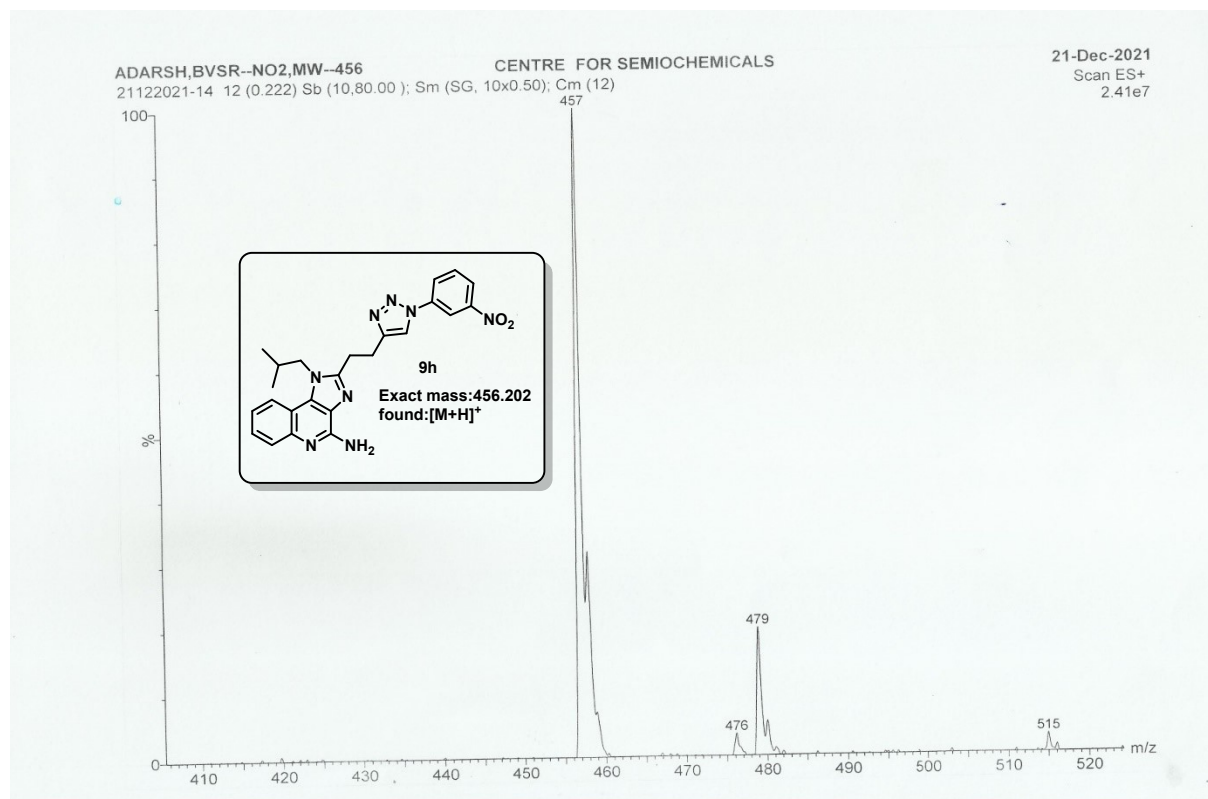

Item name: HRMS Elemental composition Mar 08, 2022 14:13:44 India Standard Time

Created time: 14:55:19 India Standard Time

**Item name: HMSAN-NO2-456**

Item name: HMSAN-NO2-456, Sample position: 1:C,2, Replicate number: 1

| Component name | Observed neutral mass (Da) | Neutral mass (Da) | Observed m/z | Mass error (ppm) | Adducts |    |
|----------------|----------------------------|-------------------|--------------|------------------|---------|----|
| 1              | C24H24N8O2                 | 456.2021          | 456.2022     | 457.2094         | -0.2    | +H |

**Component name: C24H24N8O2**

Item name: HMSAN-NO2-456  
Item description:

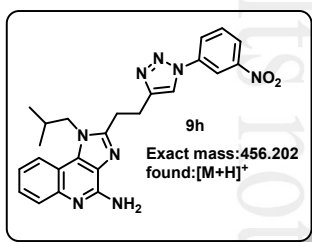

Channel name: Low energy : Time 0.3815 +/- 0.0560 minutes

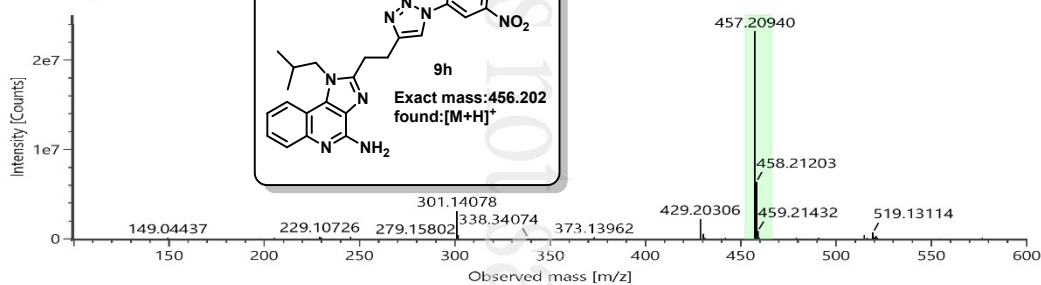

### 9i. 1-isobutyl-2-(2-(1-(3-methoxyphenyl)-1H-1,2,3-triazol-4-yl)ethyl)-1H-imidazo[4,5-c]quinolin-4-amine

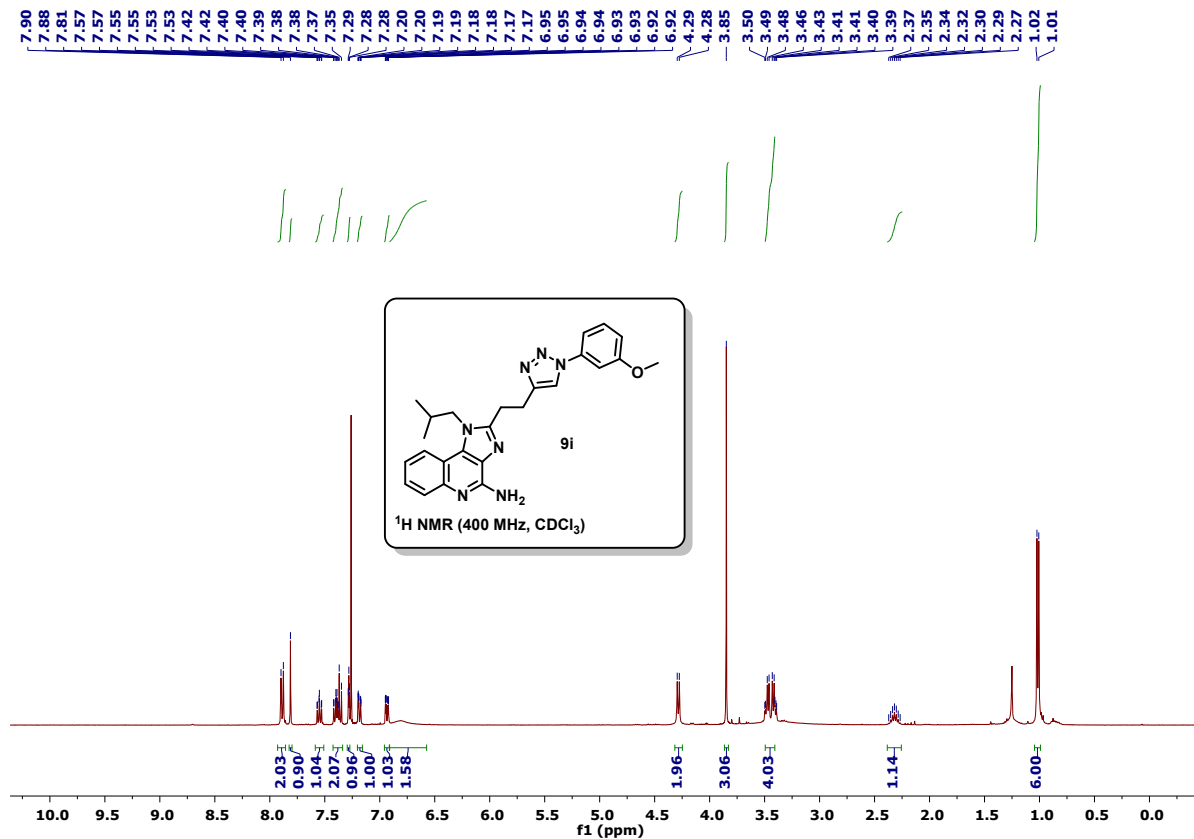



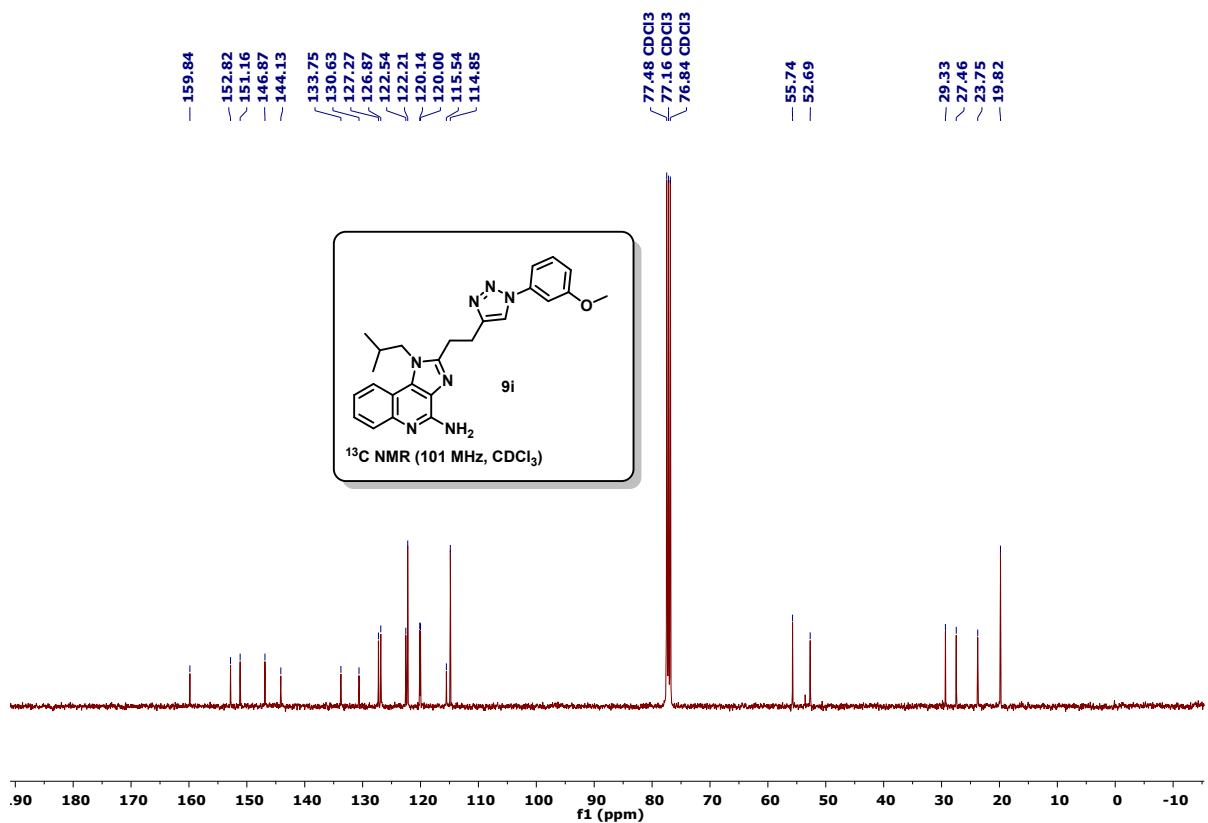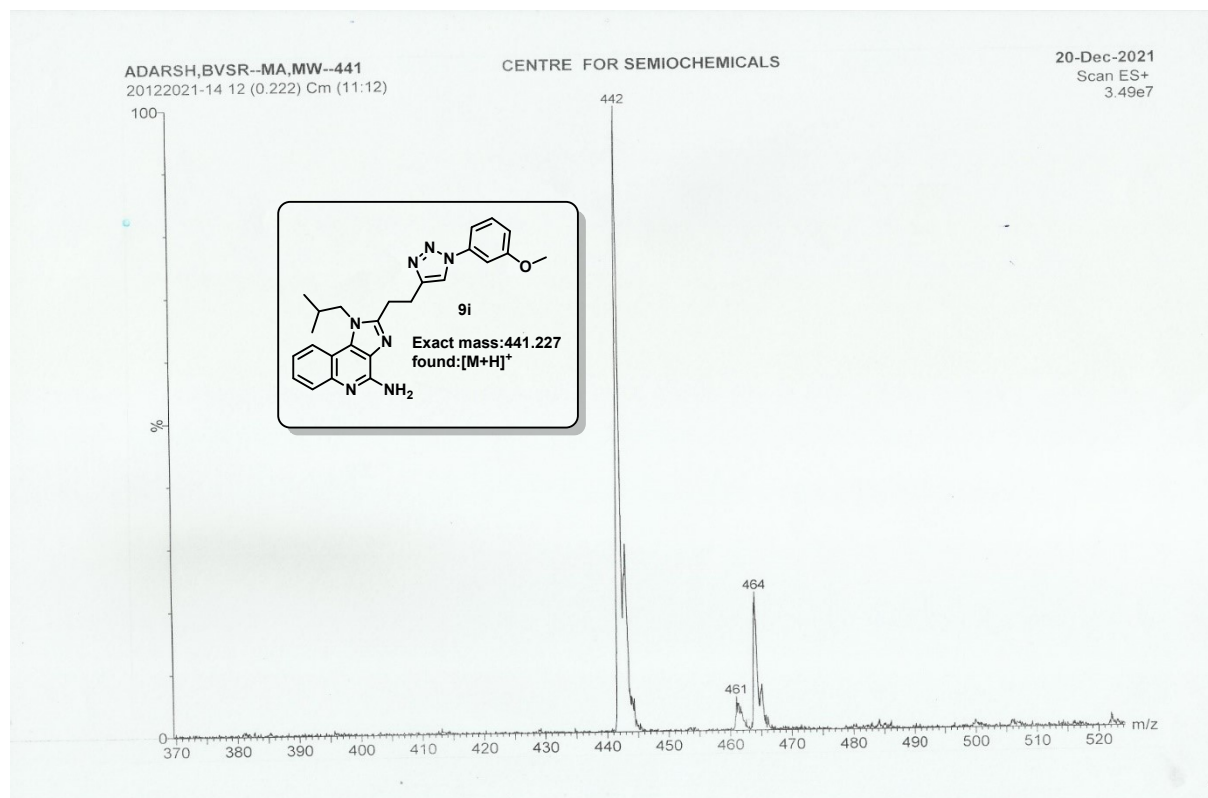

11/03/22 18:51:25

Thermo Scientific Orbitrap Exploris 120  
Analysed by G SAIKRISHNAHMS-AN-M-441 #2-17 RT: 0.01-0.09 AV: 8 SB: 80 0.32-1.20 NL: 1.00E9  
T: FTMS + p ESI Full ms [50.0000-1800.0000]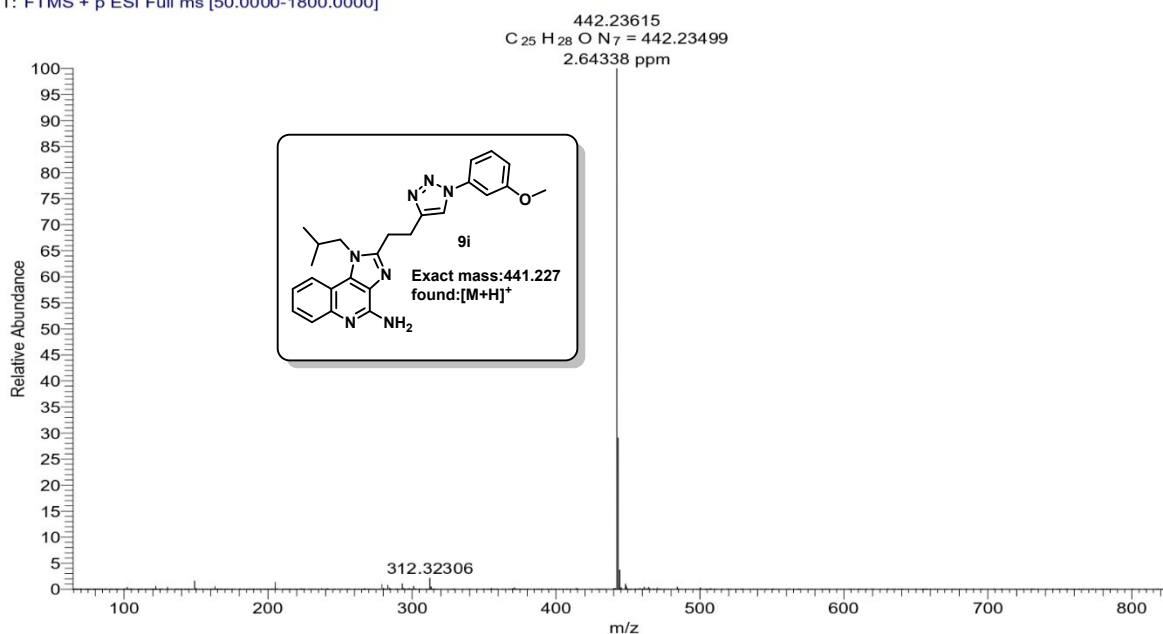

### 9j. 1-isobutyl-2-(2-(1-(2-methoxyphenyl)-1H-1,2,3-triazol-4-yl)ethyl)-1H-imidazo[4,5-c]quinolin-4-amine

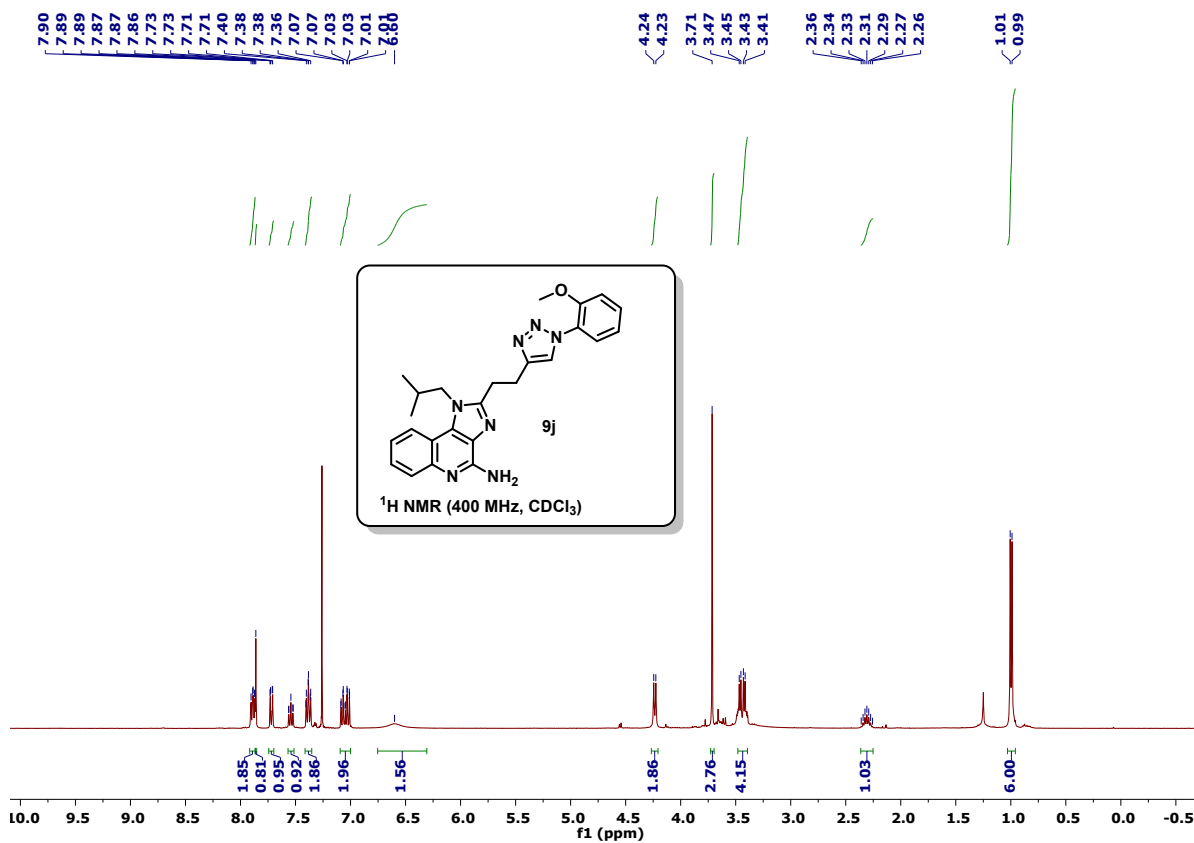

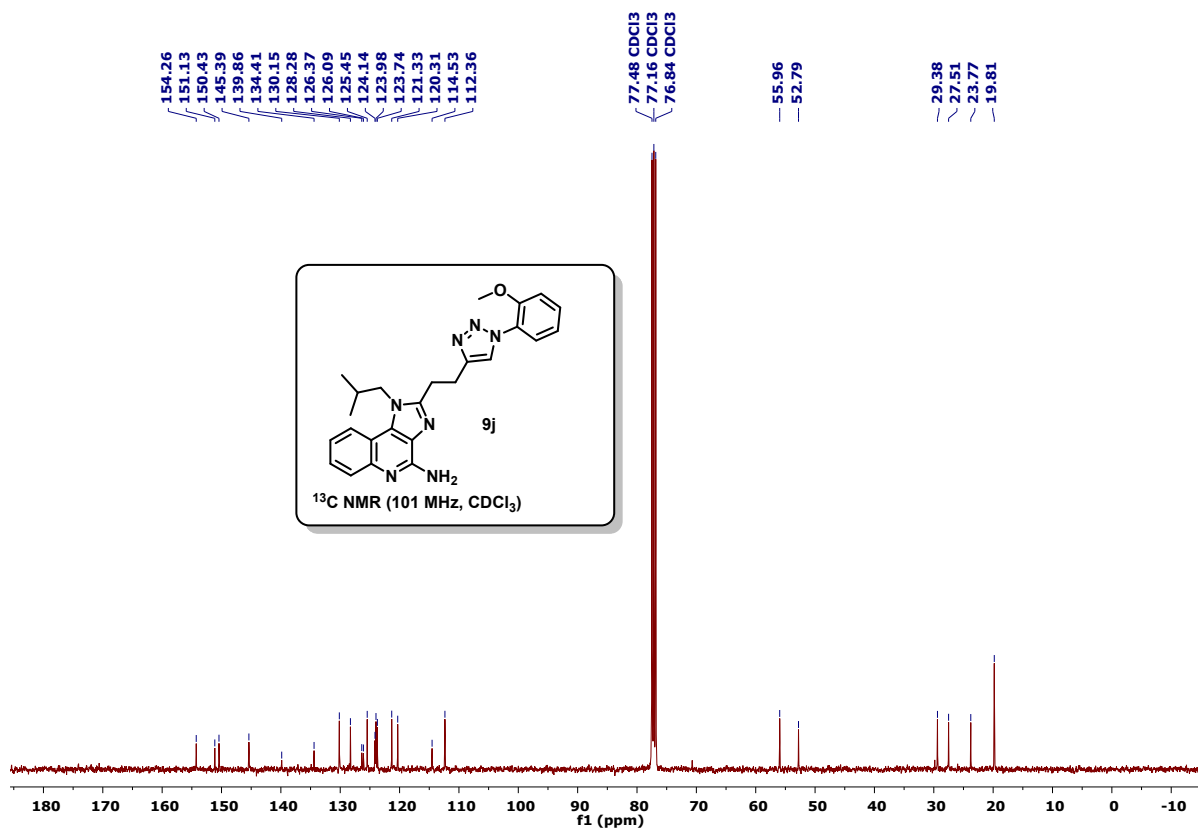

10/28/2022 2:39:07 PM Page 1 / 1

====Department of Organic Synthesis and Process Chemistry, CSIR-IICT ====

Date Acquired : 10/28/2022 2:16:17 PM  
Sample Name : HMS-AN-1-441  
Sample ID : HMS-AN-1-441  
Data File : 28-HMS-AN-1-441.lcd  
Method File : LALSPEC+&-1cm  
Comment : MASS

Sample Information

ESI-MS Spectrum  
28-HMS-AN-1-441.lcd

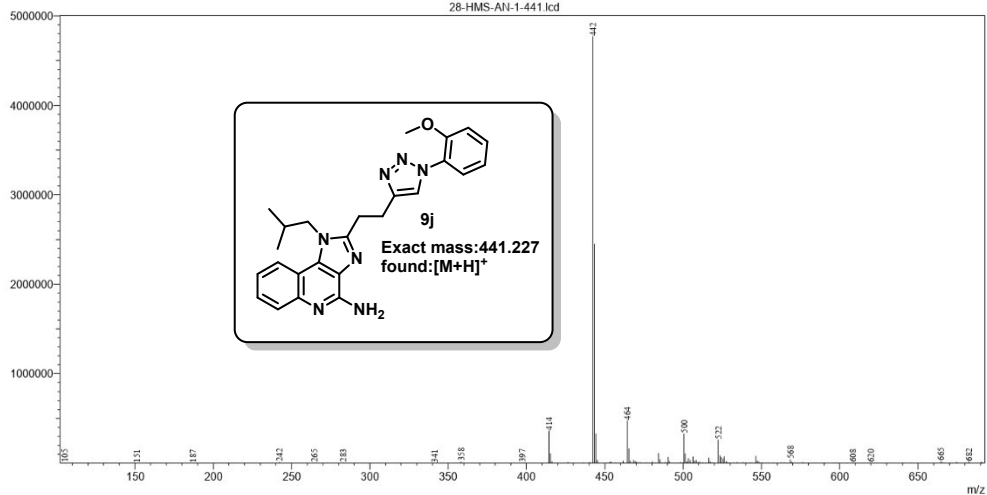

D:\Data\MASS\OCT-2022\28-HMS-AN-1-441.lcd

11/03/22 18:47:57

Thermo Scientific Orbitrap Exploris 120  
Analysed by G SAIKRISHNAHMS-AN-0-441 #9-32 RT: 0.05-0.17 AV: 12 SB: 80 0.32-1.20 NL: 4.23E8  
T: FTMS + p ESI Full ms [50.0000-1800.0000]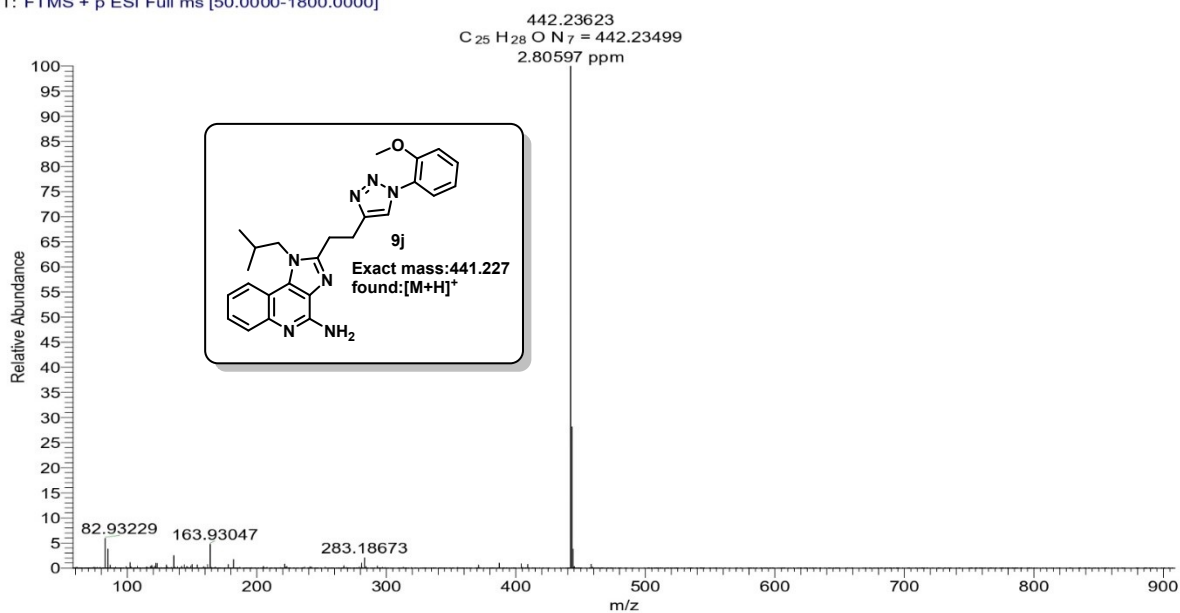

### 9k. 2-(2-(1-benzyl-1H-1,2,3-triazol-4-yl)ethyl)-1-isobutyl-1H-imidazo[4,5-c]quinolin-4-amine

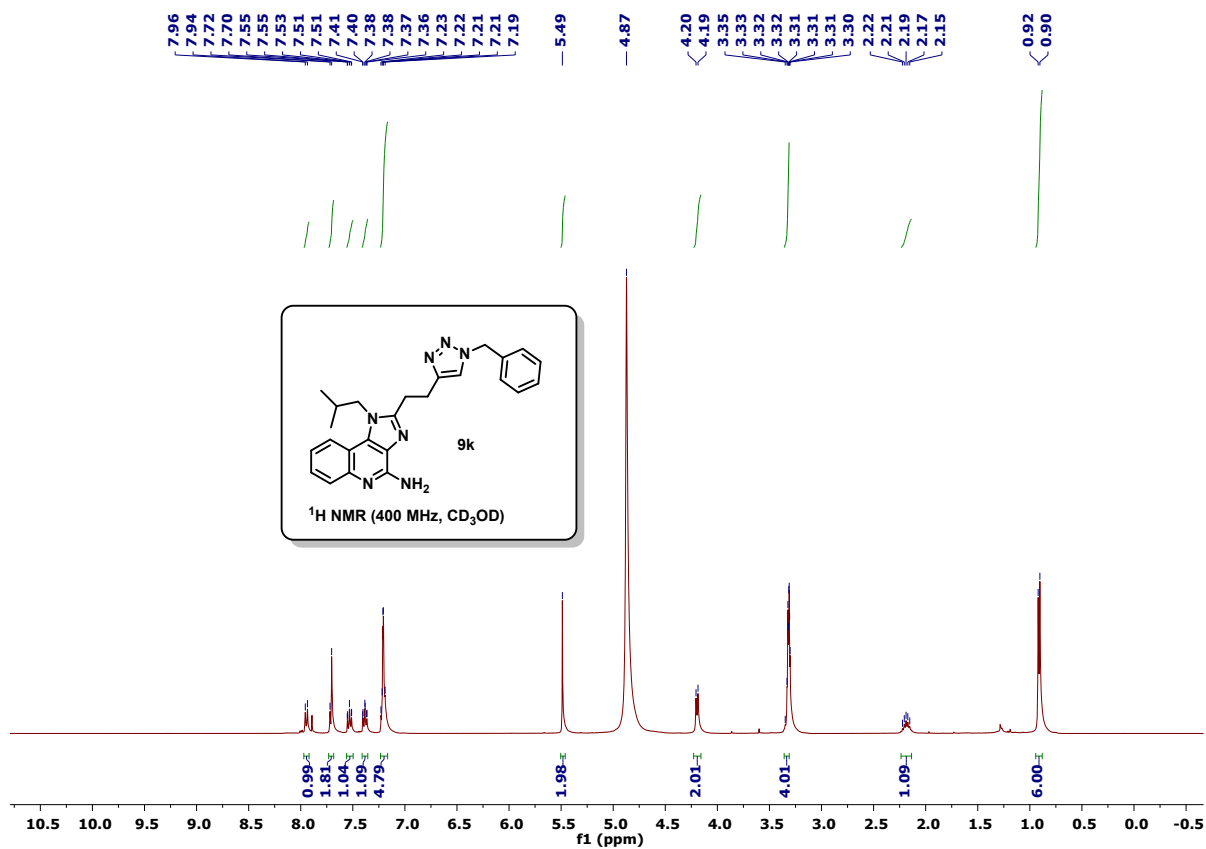

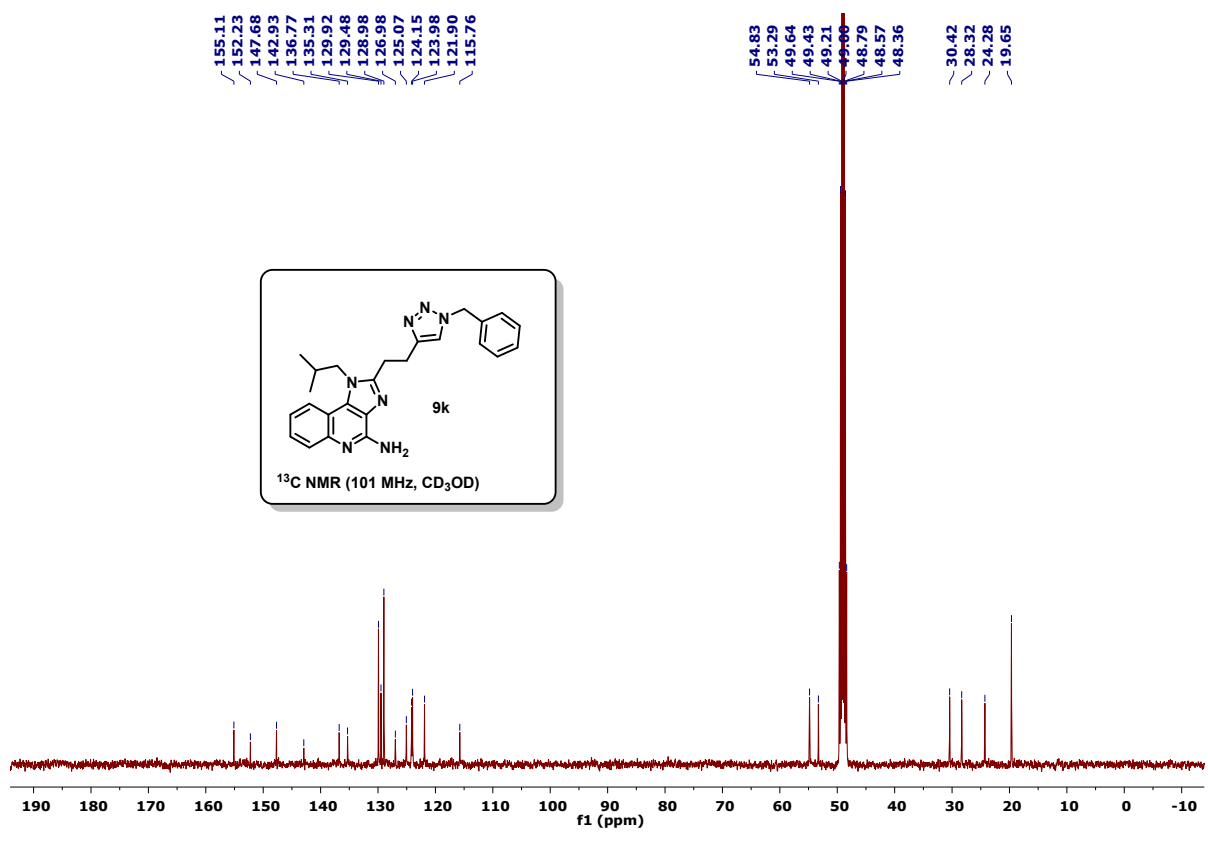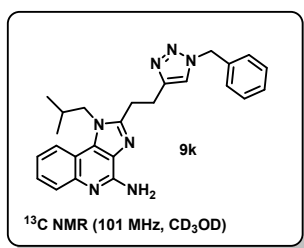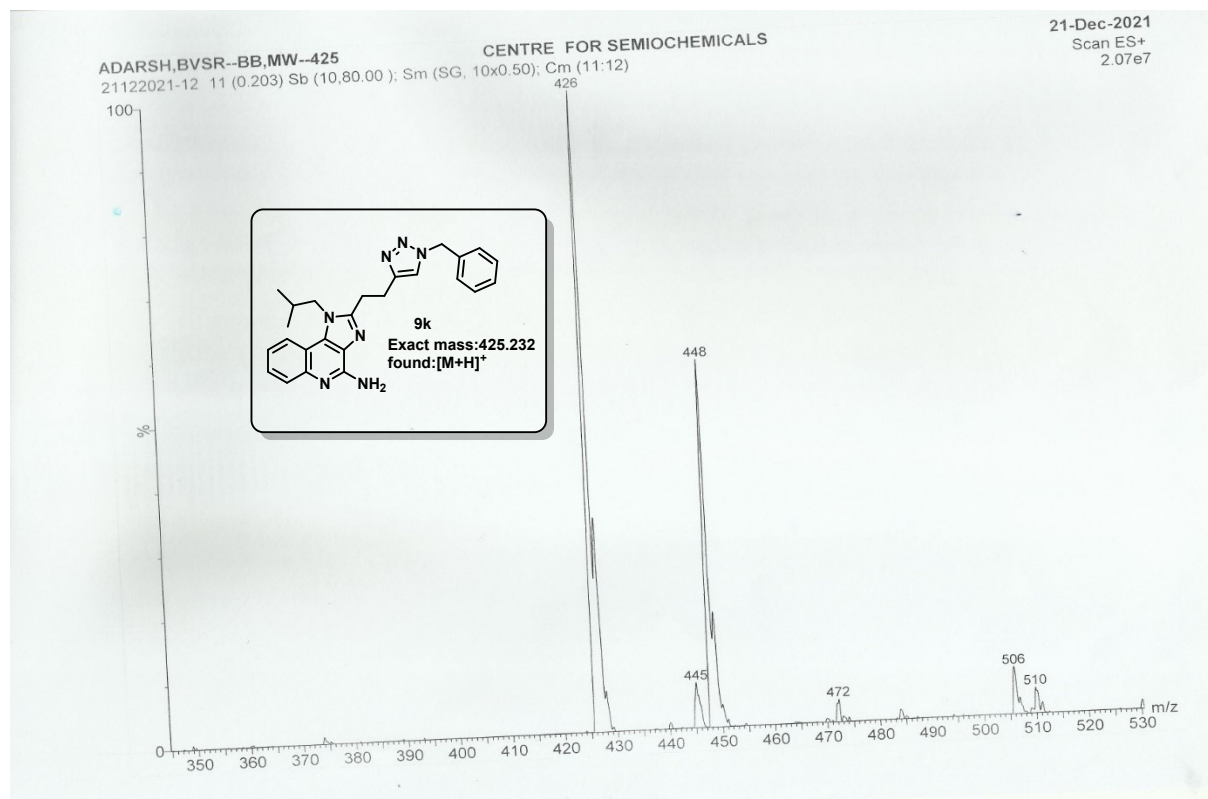

Item name: HRMS Elemental composition Mar 08, 2022 14:13:44 India Standard Time

Created time: 14:58:07 India Standard Time

Item name: **HMSAN-BB-425**

Item name: HMSAN-BB-425, Sample position: 1:C,4, Replicate number: 1

|   | Component name | Observed neutral mass (Da) | Neutral mass (Da) | Observed m/z | Mass error (ppm) | Adducts |
|---|----------------|----------------------------|-------------------|--------------|------------------|---------|
| 1 | C25H27N7       | 425.2329                   | 425.23279         | 426.2402     | 0.4              | +H      |

Component name: **C25H27N7**

Item name: HMSAN-BB-425  
Item description:

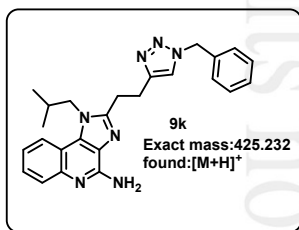

Channel name: Low energy : Time 0.3811 +/- 0.1777 minutes

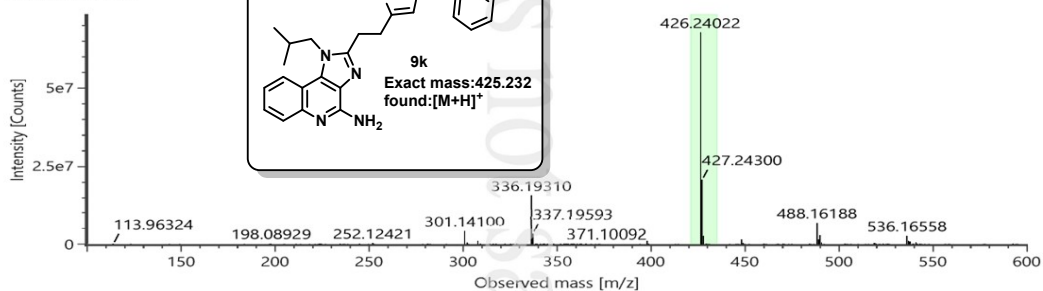

**9l. 3-(4-(2-(4-amino-1-isobutyl-1H-imidazo[4,5-c]quinolin-2-yl)ethyl)-1H-1,2,3-triazol-1-yl)propane-1,2-diol**

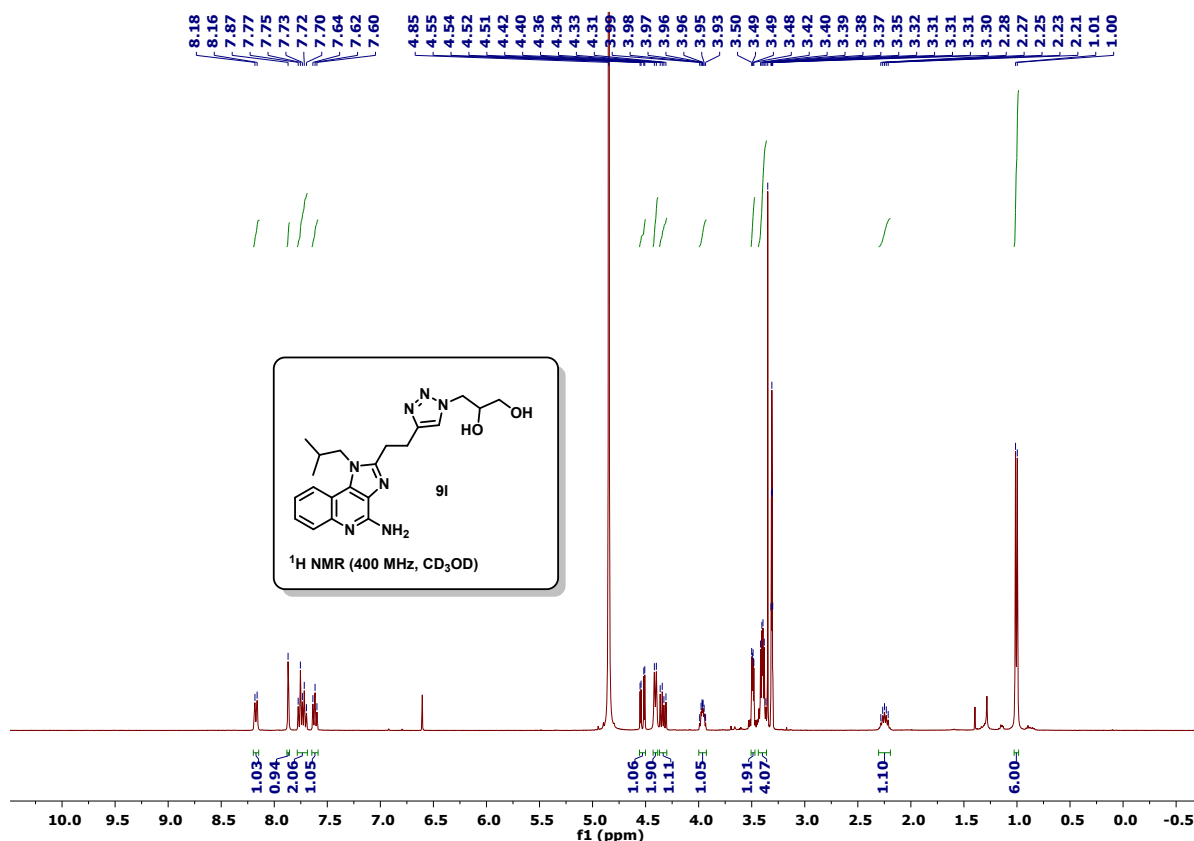

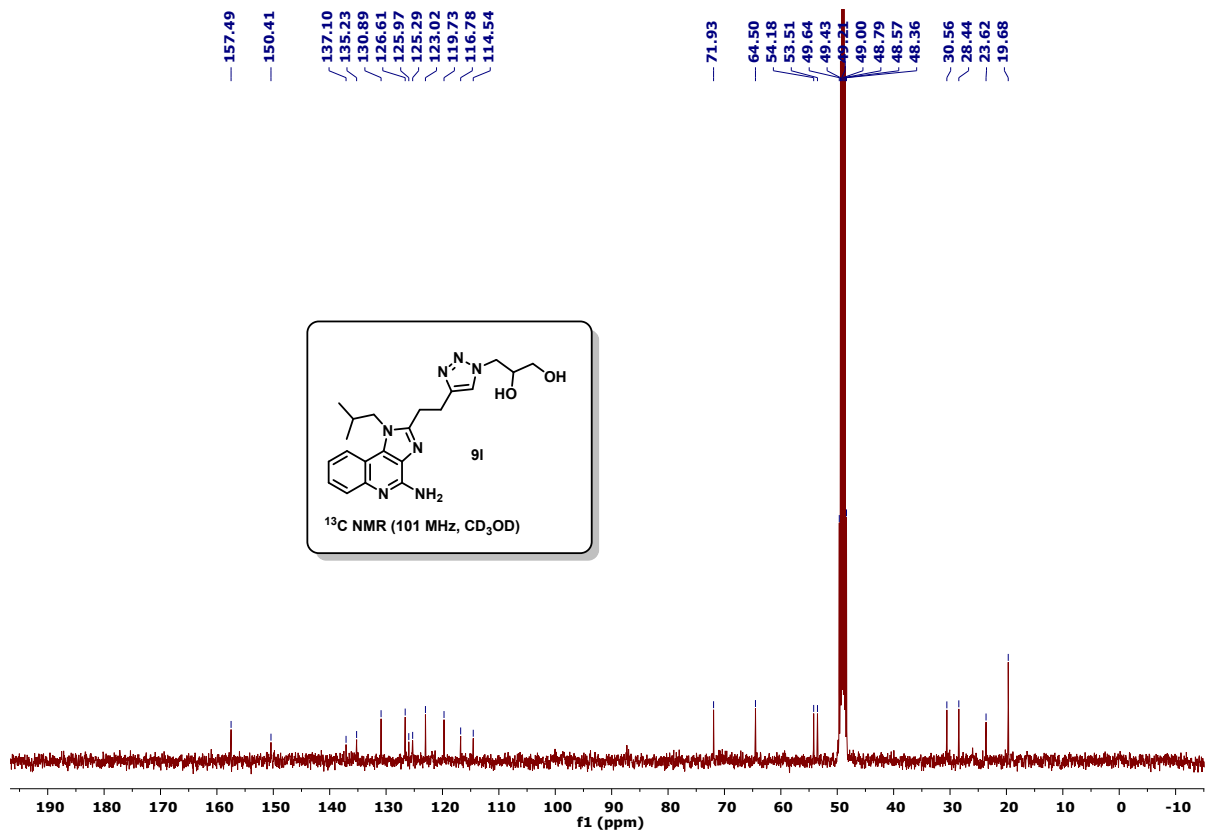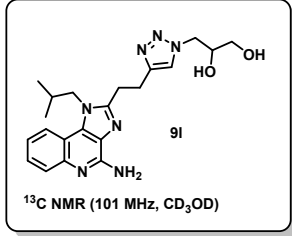

SHIMADZU  
 LabSolutions

### MASS REPORT

OSPC, Dr RATHOD

Sample Name : HMS-AN-20H-41.5  
 Data File : 01102021.42.lcd  
 Date Acquired : 10/1/2021 3:4:19 PM  
 Batch File : 01102021.3.lcb

MS Spectrum  
 D:\DATA\OCT-2021\01102021.42.lcd

Averaged ESI Positive+  
 Spectrum Mode: Averaged 0.169-0.440(11-27)  
 [CPS]

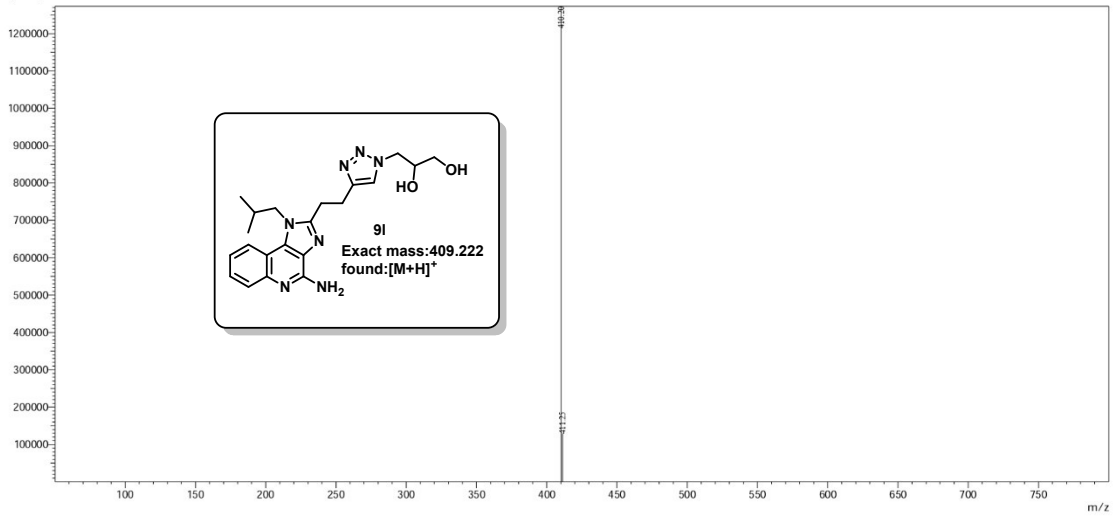

1

08/04/22 16:35:00

1180145675

Thermo Scientific Orbitrap Exploris 120

Analysed by G SAIKRISHNA

HMS-GAL2 #16-35 RT: 0.09-0.19 AV: 10 SB: 81 0.32-1.20 NL: 8.05E8

T: FTMS + p ESI Full ms [50.0000-1900.0000]

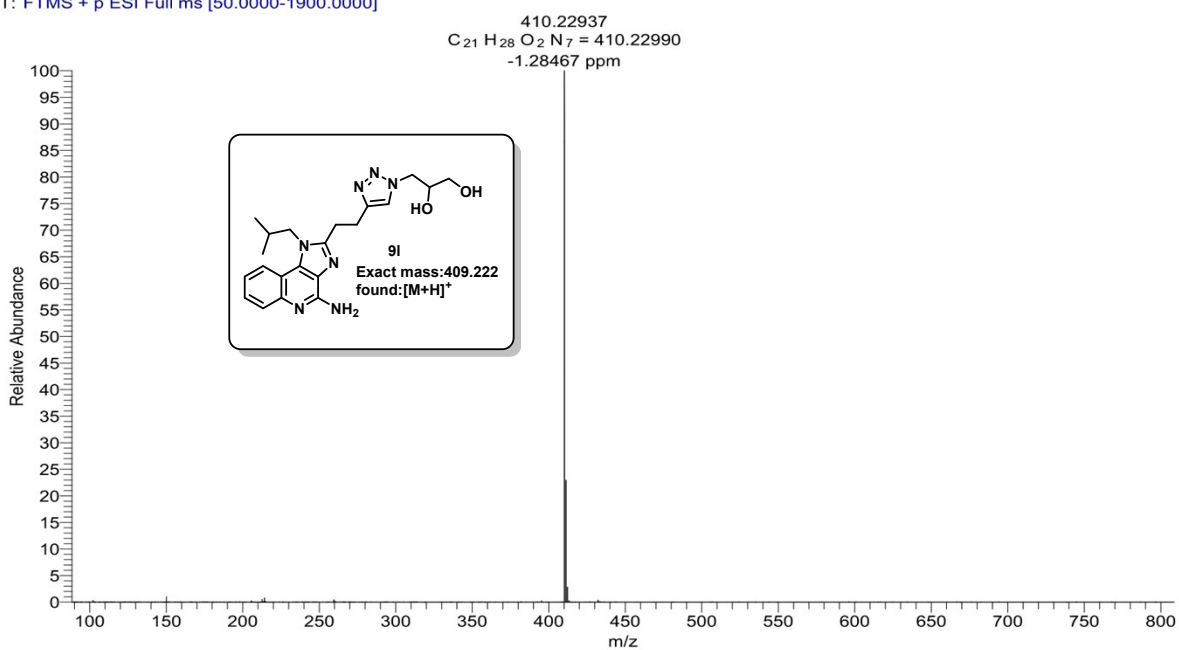

**9m. 8-(4-(4-(2-(4-amino-1-isobutyl-1H-imidazo[4,5-c]quinolin-2-yl)ethyl)-1H-1,2,3-triazol-1-yl)phenyl)octan-1-ol**

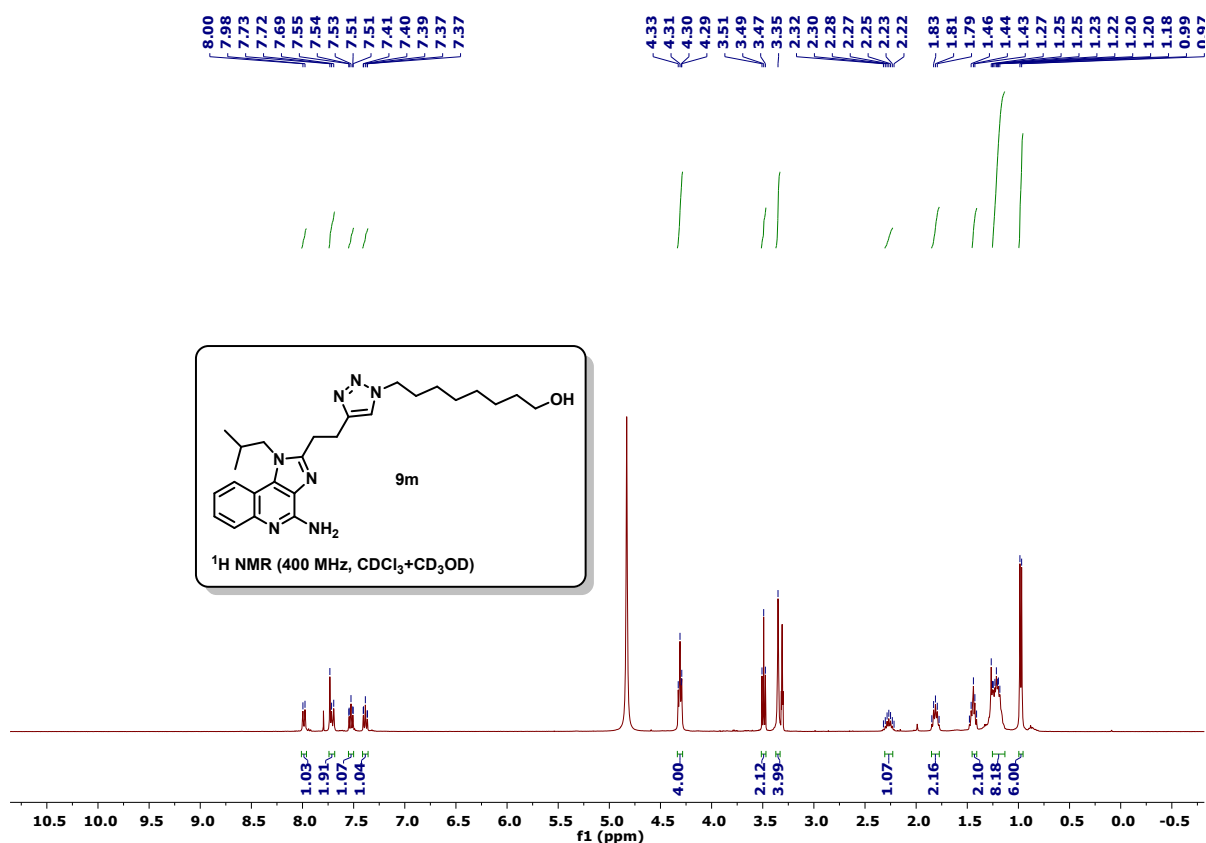



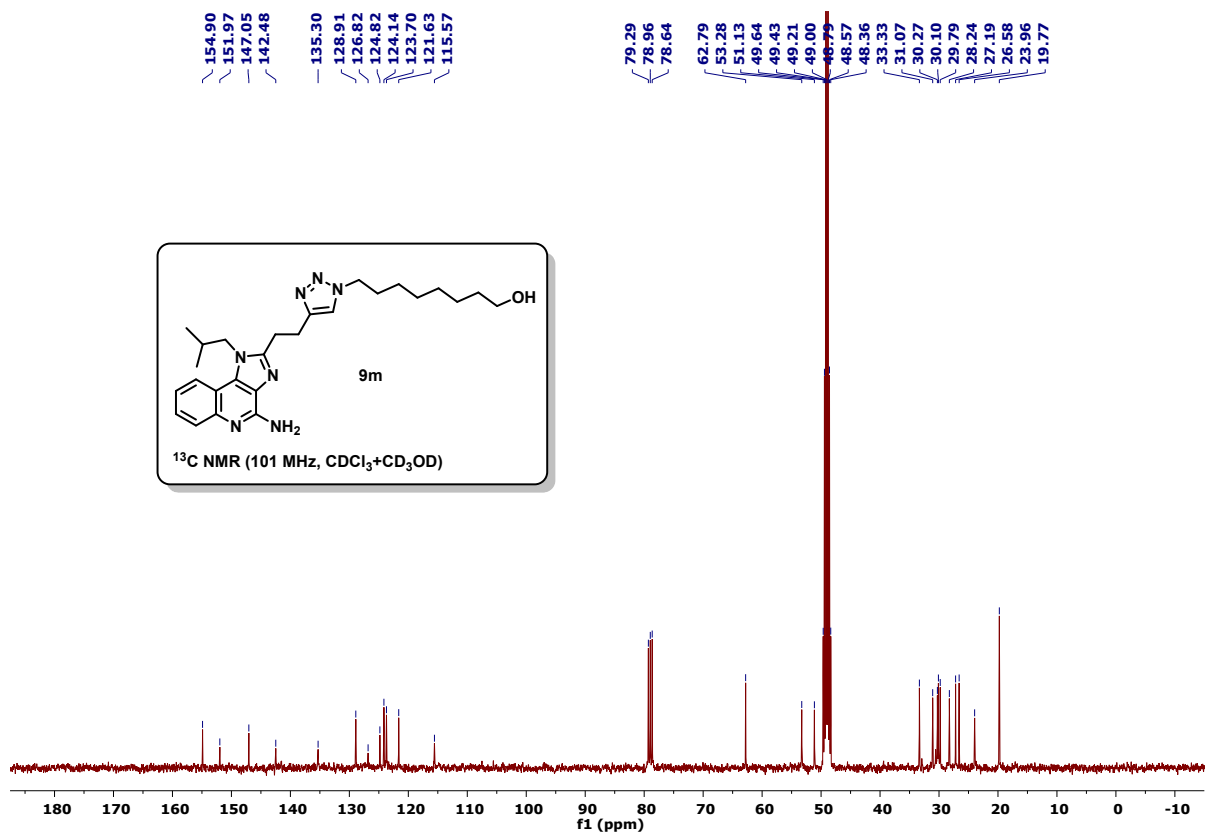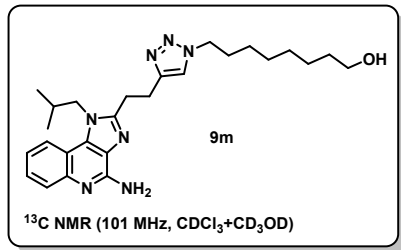

OSPC, Dr RATHOD

SHIMADZU  
LabSolutions

## MASS REPORT

Sample Name : HMS-AN-464  
 Data File : 21102021.59.lcd  
 Date Acquired : 10/21/2021 3:56:37 PM  
 Batch File : 21102021.3.lcd

MS Spectrum  
D:\DATA\OCT-2021\21102021.59.lcd

Averaged ESI Positive+  
 Spectrum Mode: Averaged 0.271-0.305(17-19)  
 [CPS]

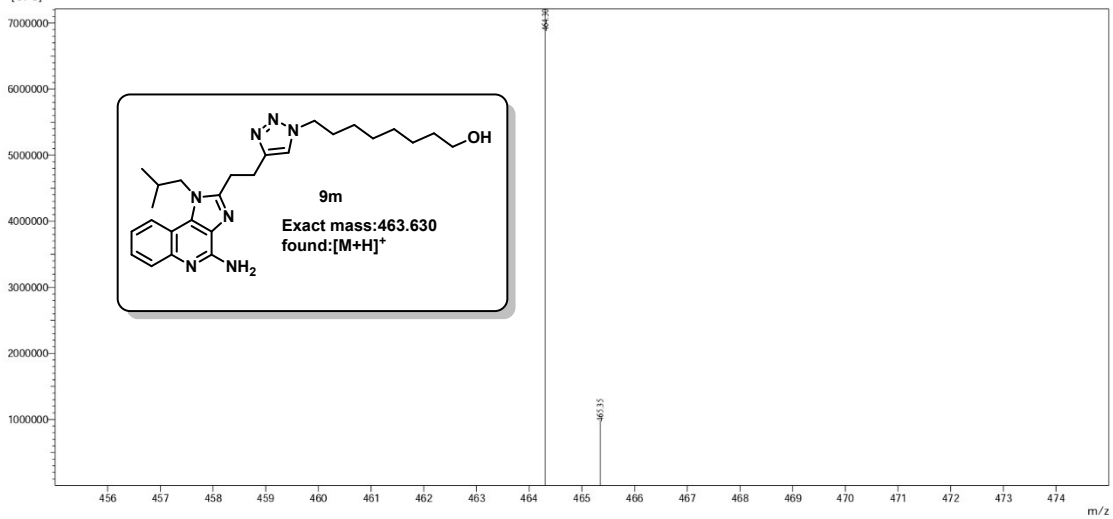

1

08/04/22 16:38:10

1180145676

Thermo Scientific Orbitrap Exploris 120

Analysed by G SAIKRISHNA

HMS-GAL3 #14-35 RT: 0.08-0.19 AV: 11 SB: 81 0.32-1.20 NL: 9.55E8

T: FTMS + p ESI Full ms [50.0000-1900.0000]

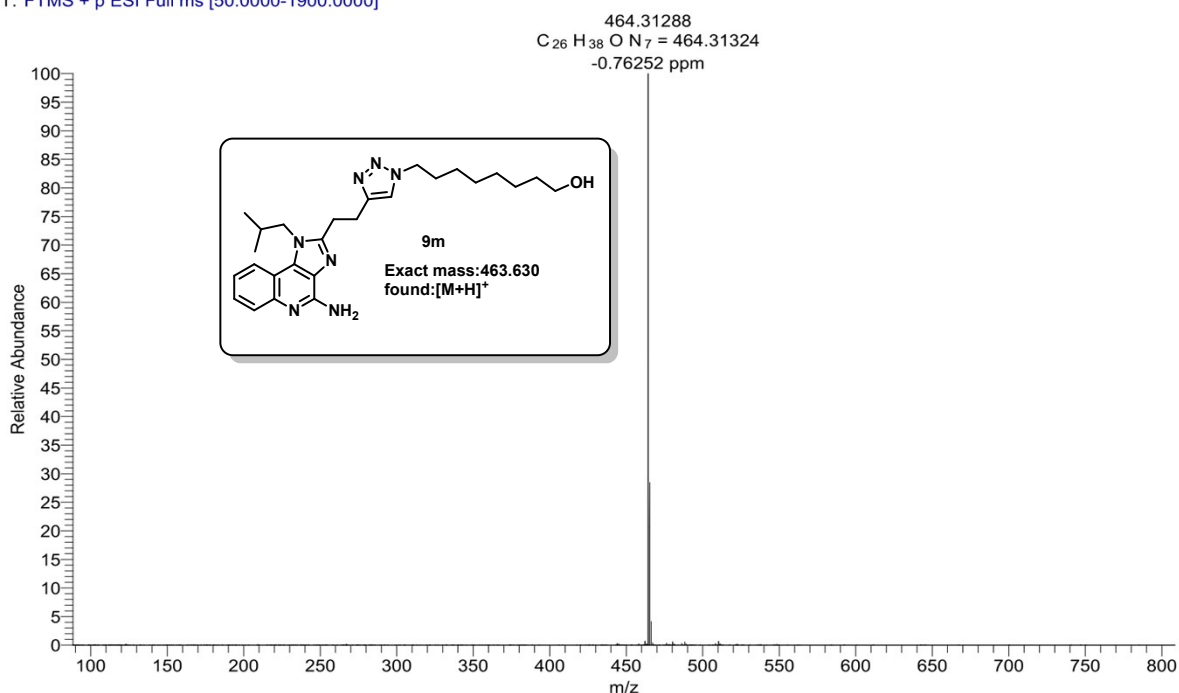

### HPLC traces of compounds 9a, 9b, 9c, 9d, 9e, 9f, 9g, 9h, 9i, 9j, 9k, 9l and 9m

Analytical HPLC was carried out on an Agilent 1260 series system equipped with a DAD detector and a ZORBAX SB-C18 column (particle size: 5 $\mu$ m, dimensions: 4.6 $\times$ 250mm), eluting with 0.1% formic acid in water (Solvent A) and CH<sub>3</sub>CN (Solvent B), gradient 5–100% Solvent B in Solvent A over 10 min with the flow rate of 1.0 mL/min. HPLC purity was determined by UV absorption at 244 nm.

### Compound 9a (Purity=97.47%)

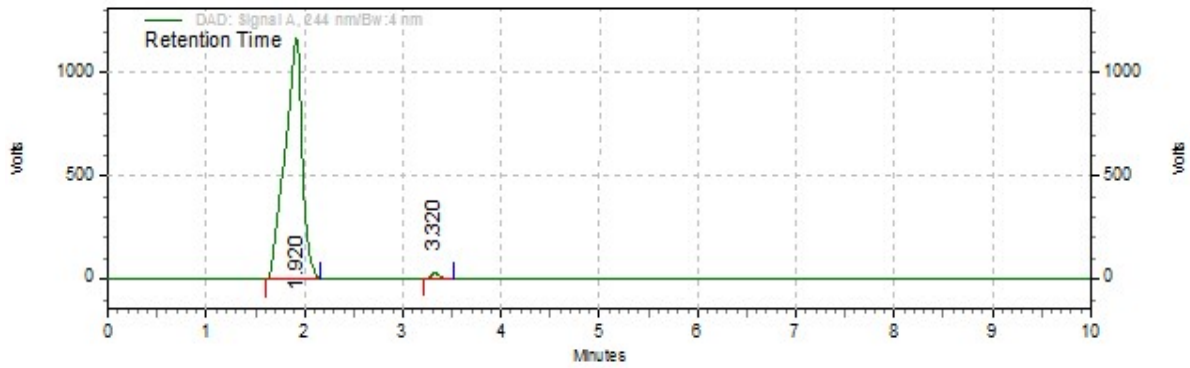

DAD: Signal A,  
244 nm/Bw :4 nm  
Results

| Retention Time | Area     | Area % | Height  | Height % |
|----------------|----------|--------|---------|----------|
| 1.920          | 29680418 | 98.65  | 2450364 | 97.47    |
| 3.320          | 405043   | 1.35   | 63675   | 2.53     |

| Totals | Area     | Area % | Height  | Height % |
|--------|----------|--------|---------|----------|
|        | 30085461 | 100.00 | 2514039 | 100.00   |

### Compound 9b (Purity=98.59%)

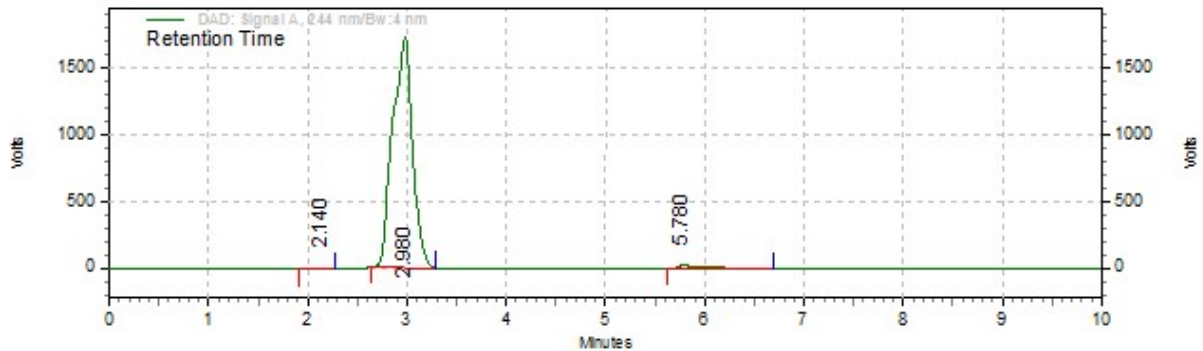

DAD: Signal A,  
244 nm/Bw :4 nm  
Results

| Retention Time | Area     | Area % | Height  | Height % |
|----------------|----------|--------|---------|----------|
| 2.140          | 63191    | 0.12   | 6733    | 0.18     |
| 2.980          | 49991263 | 97.78  | 3617386 | 98.59    |
| 5.780          | 1073554  | 2.10   | 45116   | 1.23     |

| Totals | Area     | Area % | Height  | Height % |
|--------|----------|--------|---------|----------|
|        | 51128008 | 100.00 | 3669235 | 100.00   |

### Compound 9c (Purity=97.79%)

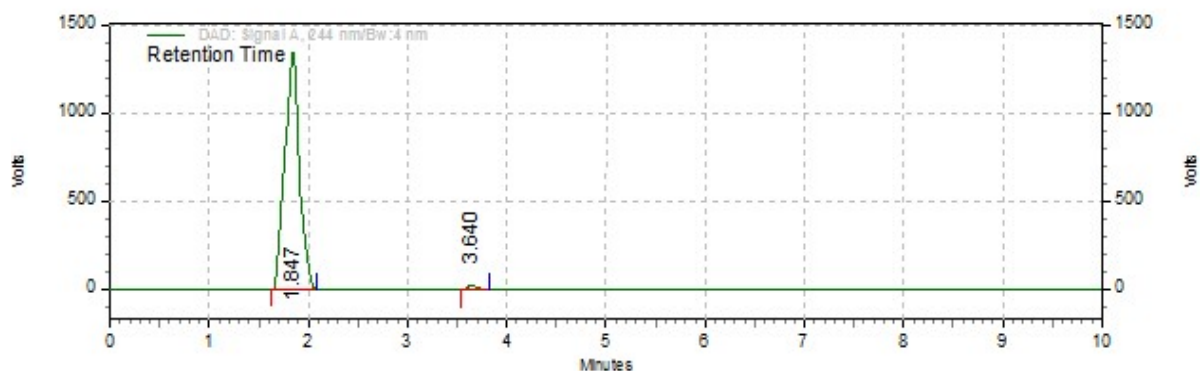

DAD: Signal A,  
244 nm/Bw :4 nm  
Results

| Retention Time | Area     | Area % | Height  | Height % |
|----------------|----------|--------|---------|----------|
| 1.847          | 29380857 | 98.65  | 2821100 | 97.79    |
| 3.640          | 401494   | 1.35   | 63737   | 2.21     |

| Totals | Area     | Area % | Height  | Height % |
|--------|----------|--------|---------|----------|
|        | 29782351 | 100.00 | 2884837 | 100.00   |

### Compound 9d (Purity=98.69%)

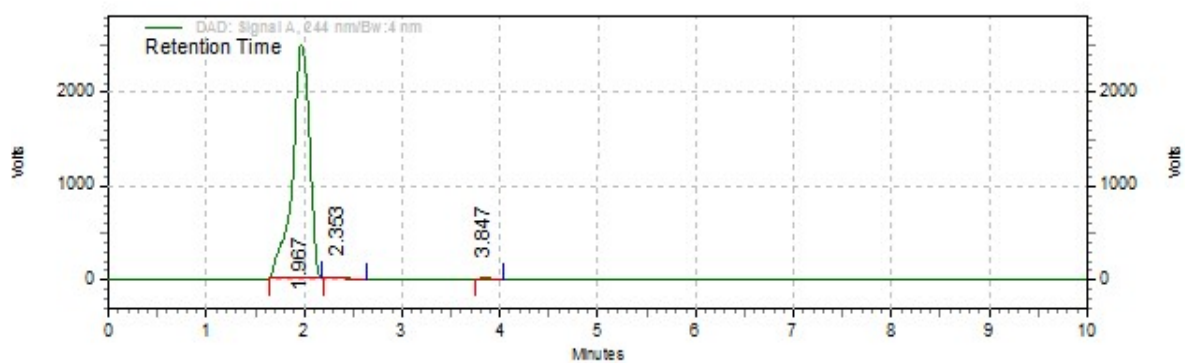

DAD: Signal A,  
244 nm/Bw :4 nm  
Results

| Retention Time | Area     | Area % | Height  | Height % |
|----------------|----------|--------|---------|----------|
| 1.967          | 62945704 | 99.03  | 5212329 | 98.69    |
| 2.353          | 336431   | 0.53   | 30163   | 0.57     |
| 3.847          | 278073   | 0.44   | 39201   | 0.74     |

| Totals | Area     | Area % | Height  | Height % |
|--------|----------|--------|---------|----------|
|        | 63560208 | 100.00 | 5281693 | 100.00   |

### Compound 9e (Purity=96.95%)

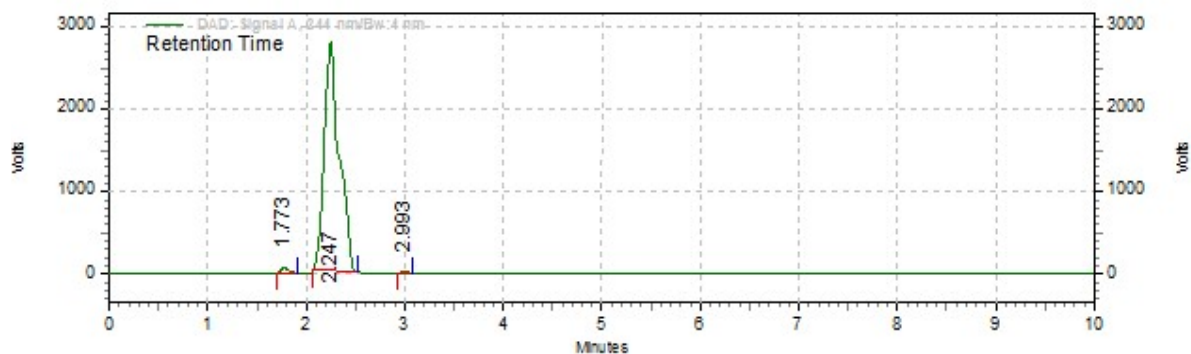

DAD: Signal A,  
244 nm/Bw :4 nm  
Results

| Retention Time | Area     | Area % | Height  | Height % |
|----------------|----------|--------|---------|----------|
| 1.773          | 829014   | 1.33   | 145875  | 2.42     |
| 2.247          | 61400086 | 98.36  | 5842118 | 96.95    |
| 2.993          | 197736   | 0.32   | 37720   | 0.63     |

| Totals | Area     | Area % | Height  | Height % |
|--------|----------|--------|---------|----------|
|        | 62426836 | 100.00 | 6025713 | 100.00   |

### Compound 9f (Purity=99.79%)

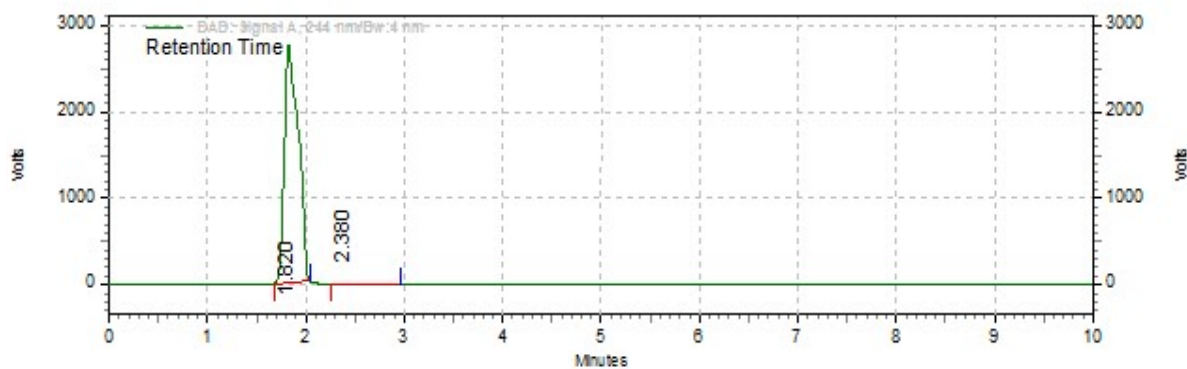

DAD: Signal A,  
244 nm/Bw :4 nm  
Results

| Retention Time | Area     | Area % | Height  | Height % |
|----------------|----------|--------|---------|----------|
| 1.820          | 56893914 | 99.21  | 5758991 | 99.79    |
| 2.380          | 450628   | 0.79   | 12070   | 0.21     |

| Totals | Area     | Area % | Height  | Height % |
|--------|----------|--------|---------|----------|
|        | 57344542 | 100.00 | 5771061 | 100.00   |

### Compound 9g (Purity=97.24%)

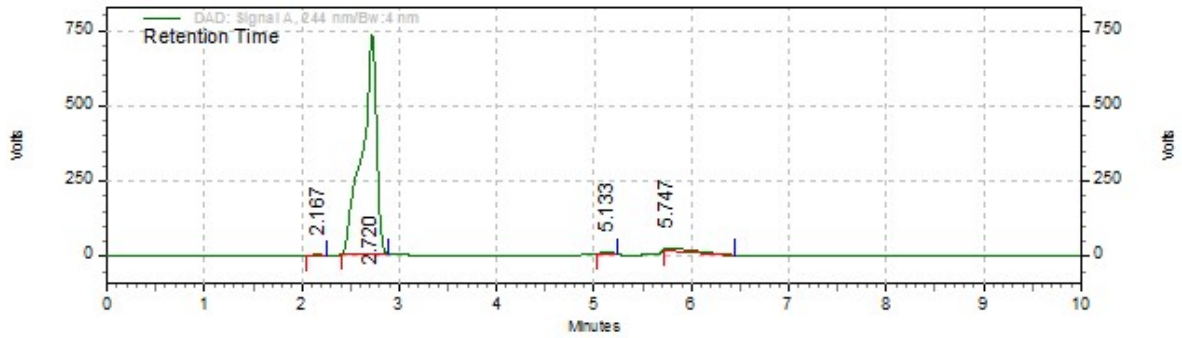

DAD: Signal A,  
244 nm/Bw:4 nm  
Results

| Retention Time | Area     | Area % | Height  | Height % |
|----------------|----------|--------|---------|----------|
| 2.167          | 48811    | 0.30   | 7901    | 0.50     |
| 2.720          | 15924833 | 96.68  | 1528413 | 97.24    |
| 5.133          | 123386   | 0.75   | 17258   | 1.10     |
| 5.747          | 374332   | 2.27   | 18217   | 1.16     |

| Totals | Area     | Area % | Height  | Height % |
|--------|----------|--------|---------|----------|
|        | 16471362 | 100.00 | 1571789 | 100.00   |

### Compound 9h (Purity=98.05%)

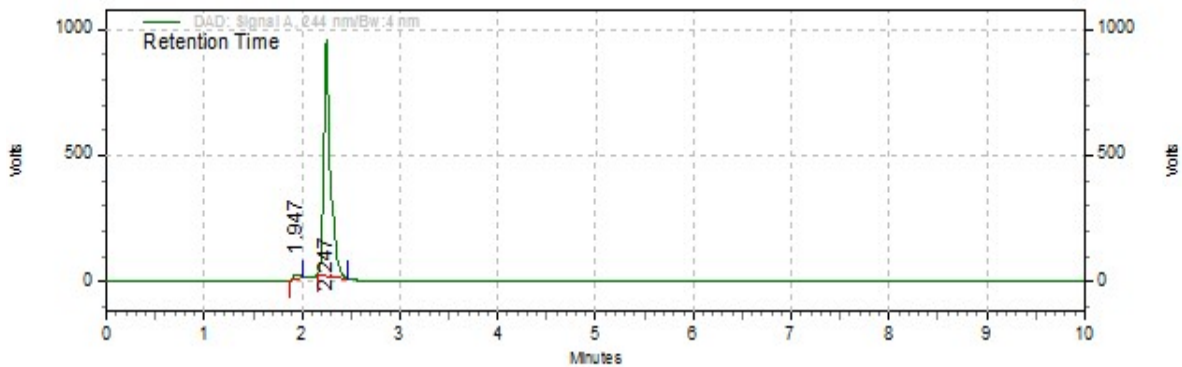

DAD: Signal A,  
244 nm/Bw:4 nm  
Results

| Retention Time | Area    | Area % | Height  | Height % |
|----------------|---------|--------|---------|----------|
| 1.947          | 173268  | 1.86   | 39041   | 1.95     |
| 2.247          | 9164142 | 98.14  | 1965088 | 98.05    |

| Totals | Area    | Area % | Height  | Height % |
|--------|---------|--------|---------|----------|
|        | 9337410 | 100.00 | 2004129 | 100.00   |

### Compound 9i (Purity=98.78%)

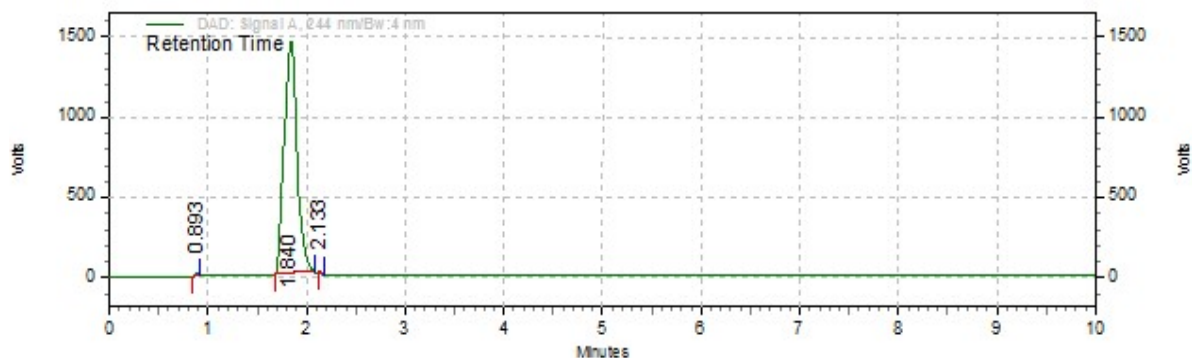

DAD: Signal A,  
244 nm/Bw :4 nm  
Results

| Retention Time | Area     | Area % | Height  | Height % |
|----------------|----------|--------|---------|----------|
| 0.893          | 56598    | 0.20   | 20087   | 0.66     |
| 1.840          | 27567079 | 99.68  | 3028262 | 98.78    |
| 2.133          | 32328    | 0.12   | 17205   | 0.56     |

| Totals | Area     | Area % | Height  | Height % |
|--------|----------|--------|---------|----------|
|        | 27656005 | 100.00 | 3065554 | 100.00   |

### Compound 9j (Purity=97.74%)

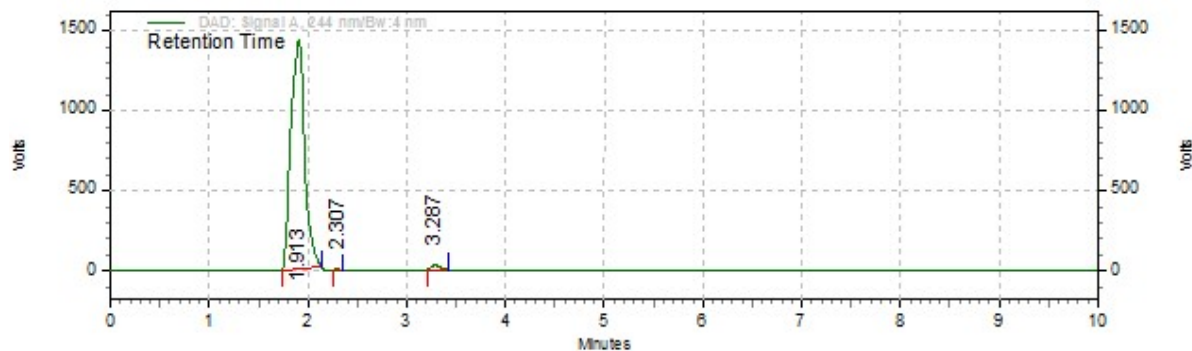

DAD: Signal A,  
244 nm/Bw :4 nm  
Results

| Retention Time | Area     | Area % | Height  | Height % |
|----------------|----------|--------|---------|----------|
| 1.913          | 29022596 | 98.73  | 3000432 | 97.74    |
| 2.307          | 33876    | 0.12   | 12882   | 0.42     |
| 3.287          | 339292   | 1.15   | 56392   | 1.84     |

| Totals | Area     | Area % | Height  | Height % |
|--------|----------|--------|---------|----------|
|        | 29395764 | 100.00 | 3069706 | 100.00   |

### Compound 9k (Purity=97.66%)

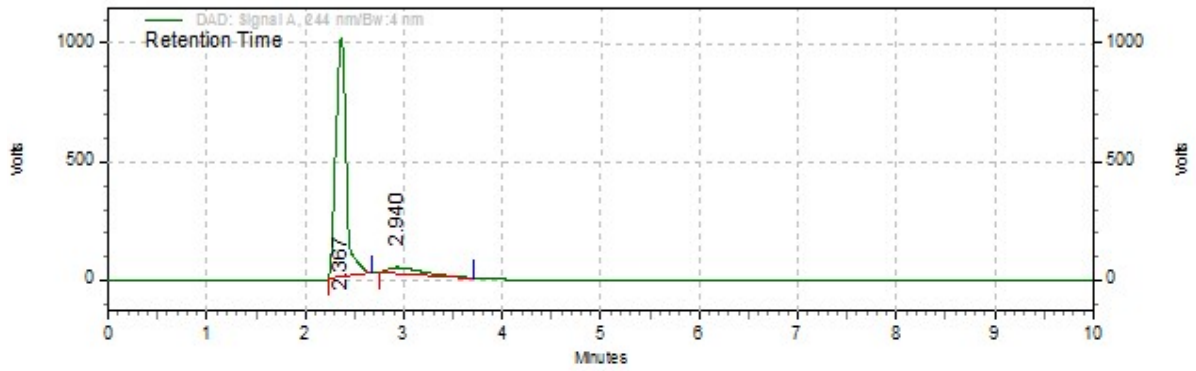

DAD: Signal A,  
244 nm/Bw:4 nm  
Results

| Retention Time | Area     | Area % | Height  | Height % |
|----------------|----------|--------|---------|----------|
| 2.367          | 15236991 | 92.90  | 2111510 | 97.66    |
| 2.940          | 1164723  | 7.10   | 50575   | 2.34     |
| Totals         | 16401714 | 100.00 | 2162085 | 100.00   |

### Compound 9l (Purity=98.69%)

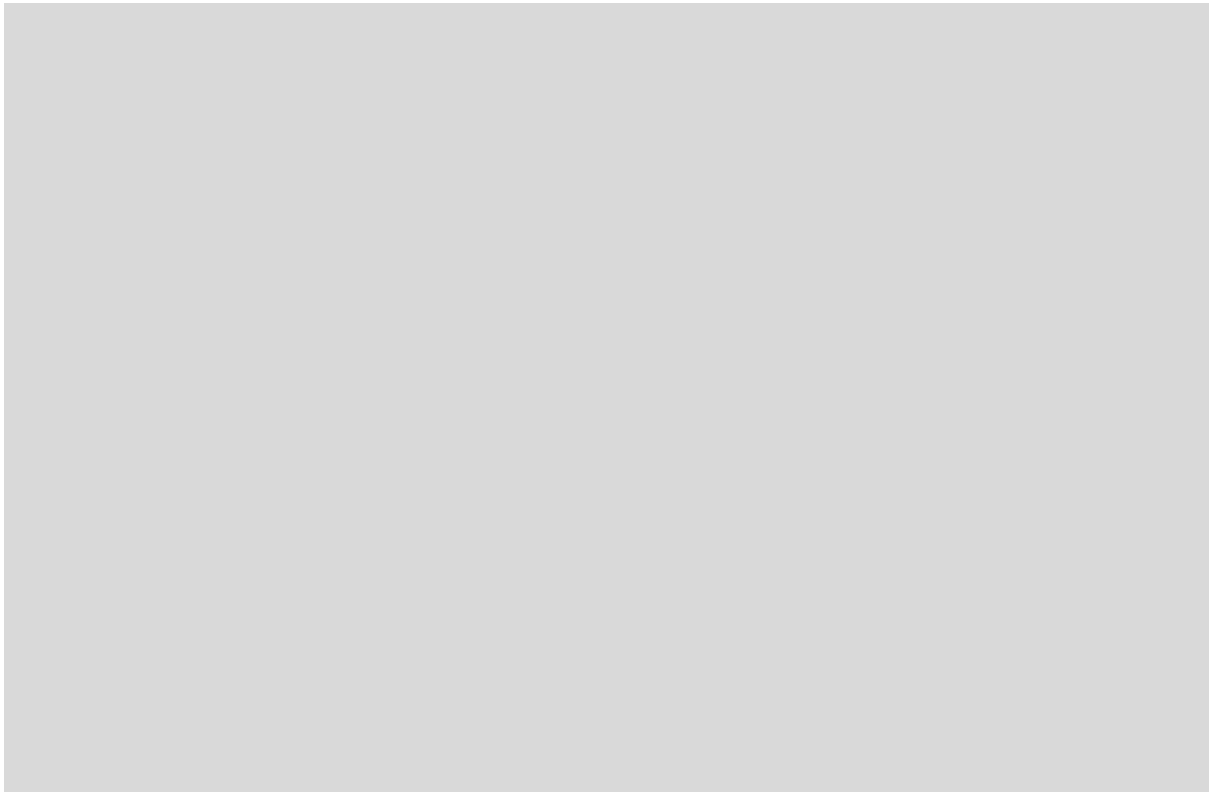



### Compound 9m (Purity=97.58%)

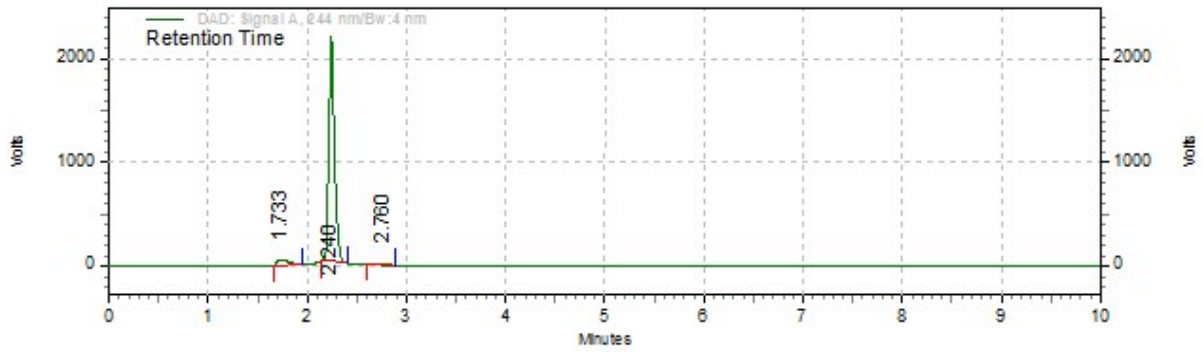

DAD: Signal A,  
244 nm/Bw:4 nm  
Results

| Retention Time | Area            | Area %        | Height         | Height %      |
|----------------|-----------------|---------------|----------------|---------------|
| 1.733          | 861723          | 4.61          | 96124          | 2.05          |
| 2.240          | 17670101        | 94.55         | 4565743        | 97.58         |
| 2.760          | 156970          | 0.84          | 16973          | 0.36          |
| <b>Totals</b>  | <b>18688794</b> | <b>100.00</b> | <b>4678840</b> | <b>100.00</b> |
